# Supplementary material for: A large genomic insertion containing a duplicated follistatin gene is linked to the pea aphid male wing dimorphism
Source: eLife. 2020 Mar 6;9:e50608. doi: 10.7554/eLife.50608 (PMC7060042; doi:10.7554/eLife.50608)
Supplement: Source data 2. [file elife-50608-data2.xlsx]

## Sheet: Sheet1
Source data 2: Fst values for winged versus wingless pool-seq comparisons
Reference contig	Position of the window (middle)	SNPs identified in the window	fraction of window having sufficient coverage	average minimum coverage	Fst values
CM016664.1	10000	109	0.082	44.5	0.0141305
CM016664.1	20000	34	0.067	33.4	0.0283048
CM016664.1	30000	79	0.348	41	0.0105485
CM016664.1	40000	163	0.701	42.1	0.0102819
CM016664.1	50000	177	0.587	42.3	0.0125201
CM016664.1	60000	182	0.625	42	0.0120769
CM016664.1	70000	274	0.804	43.3	0.0114558
CM016664.1	80000	568	0.584	47	0.0122464
CM016664.1	90000	528	0.351	50.2	0.00963918
CM016664.1	100000	236	0.32	45.5	0.00766528
CM016664.1	110000	173	0.629	41.7	0.0158414
CM016664.1	120000	103	0.819	40.7	0.0161292
CM016664.1	130000	215	0.71	42.1	0.0152518
CM016664.1	140000	208	0.619	43.2	0.0155636
CM016664.1	150000	95	0.659	41.8	0.0161074
CM016664.1	160000	119	0.697	42.5	0.0135651
CM016664.1	170000	139	0.671	45.3	0.0136542
CM016664.1	180000	159	0.837	44.8	0.0159809
CM016664.1	190000	144	0.912	42.2	0.0152517
CM016664.1	200000	211	0.924	42	0.017482
CM016664.1	210000	234	0.899	42.2	0.0159709
CM016664.1	220000	181	0.589	41.7	0.0201592
CM016664.1	230000	87	0.175	41.6	0.0276948
CM016664.1	240000	179	0.202	63.1	0.00986234
CM016664.1	250000	230	0.501	48.9	0.0108944
CM016664.1	260000	133	0.673	40.1	0.0134586
CM016664.1	270000	133	0.735	39.6	0.0157509
CM016664.1	280000	122	0.799	39.3	0.0209485
CM016664.1	290000	136	0.867	41.6	0.0179495
CM016664.1	300000	131	0.804	42	0.0139435
CM016664.1	310000	116	0.722	39.7	0.0201362
CM016664.1	320000	145	0.766	39.7	0.0170087
CM016664.1	330000	193	0.71	41.8	0.0157639
CM016664.1	340000	157	0.704	42.8	0.017463
CM016664.1	350000	112	0.815	42.8	0.0188828
CM016664.1	360000	98	0.744	43.3	0.0152469
CM016664.1	370000	102	0.769	41.3	0.0183285
CM016664.1	380000	95	0.604	39.6	0.0218264
CM016664.1	390000	174	0.636	42.4	0.011426
CM016664.1	400000	287	0.903	42.9	0.0124231
CM016664.1	410000	373	0.841	40.3	0.0169069
CM016664.1	420000	358	0.704	39.2	0.0169473
CM016664.1	430000	270	0.693	41	0.0146876
CM016664.1	440000	222	0.738	41.4	0.0141444
CM016664.1	450000	163	0.649	41.3	0.0156207
CM016664.1	460000	168	0.721	41.4	0.0153967
CM016664.1	470000	224	0.842	41.7	0.0161698
CM016664.1	480000	220	0.765	40.8	0.0179476
CM016664.1	490000	224	0.729	40	0.0223408
CM016664.1	500000	242	0.709	40.6	0.0212159
CM016664.1	510000	177	0.661	40.2	0.0168549
CM016664.1	520000	251	0.735	41.8	0.0168327
CM016664.1	530000	226	0.548	41.8	0.016078
CM016664.1	540000	215	0.539	38.9	0.0217644
CM016664.1	550000	329	0.811	39.7	0.0216774
CM016664.1	560000	278	0.809	40.7	0.0179459
CM016664.1	570000	250	0.817	41.9	0.0164822
CM016664.1	580000	202	0.86	41.7	0.0177066
CM016664.1	590000	232	0.893	40.7	0.0137712
CM016664.1	600000	306	0.869	40.6	0.0145556
CM016664.1	610000	271	0.764	40.8	0.0154798
CM016664.1	620000	318	0.839	42.1	0.0149277
CM016664.1	630000	335	0.806	41.7	0.0170139
CM016664.1	640000	296	0.639	38.9	0.0156004
CM016664.1	650000	346	0.759	40.8	0.0134672
CM016664.1	660000	339	0.806	42.3	0.0143727
CM016664.1	670000	332	0.82	42.3	0.0168021
CM016664.1	680000	326	0.859	42.7	0.0165449
CM016664.1	690000	308	0.863	42.3	0.0187723
CM016664.1	700000	264	0.829	42.6	0.0197148
CM016664.1	710000	266	0.788	41.5	0.017138
CM016664.1	720000	305	0.788	40.1	0.014516
CM016664.1	730000	344	0.797	40.7	0.0116523
CM016664.1	740000	514	0.813	41.4	0.0123442
CM016664.1	750000	542	0.807	42.1	0.0124677
CM016664.1	760000	446	0.71	41.5	0.0151883
CM016664.1	770000	331	0.558	41	0.0174847
CM016664.1	780000	410	0.683	41	0.0144391
CM016664.1	790000	490	0.762	41.5	0.0129853
CM016664.1	800000	461	0.809	42.5	0.0119384
CM016664.1	810000	458	0.892	42.1	0.014413
CM016664.1	820000	377	0.841	42.2	0.0162141
CM016664.1	830000	357	0.837	42.2	0.014045
CM016664.1	840000	417	0.886	42.2	0.0120209
CM016664.1	850000	409	0.897	42.3	0.0118667
CM016664.1	860000	339	0.732	41.5	0.0133246
CM016664.1	870000	377	0.729	40.8	0.012824
CM016664.1	880000	353	0.558	40.2	0.013724
CM016664.1	890000	275	0.438	39.9	0.0173966
CM016664.1	900000	206	0.51	39.7	0.0162992
CM016664.1	910000	305	0.651	39.8	0.0149315
CM016664.1	920000	327	0.623	41.1	0.0148385
CM016664.1	930000	134	0.232	41.7	0.0172256
CM016664.1	940000	158	0.27	41	0.0162187
CM016664.1	950000	372	0.592	40.5	0.0167294
CM016664.1	960000	484	0.76	40.1	0.0172765
CM016664.1	970000	707	0.836	47.8	0.0119691
CM016664.1	980000	729	0.882	46.9	0.0135512
CM016664.1	990000	534	0.873	40.6	0.0148682
CM016664.1	1000000	478	0.886	40.9	0.0140934
CM016664.1	1010000	402	0.867	41	0.0160273
CM016664.1	1020000	427	0.882	41.5	0.014201
CM016664.1	1030000	423	0.828	41.5	0.0140207
CM016664.1	1040000	400	0.516	41.6	0.0131977
CM016664.1	1050000	278	0.214	39	0.0146919
CM016664.1	1060000	191	0.189	37.8	0.0168403
CM016664.1	1070000	143	0.152	38.1	0.0138762
CM016664.1	1080000	172	0.234	44.7	0.0110581
CM016664.1	1090000	369	0.493	46.8	0.0108291
CM016664.1	1100000	417	0.661	43.1	0.015009
CM016664.1	1110000	390	0.647	40.4	0.0156782
CM016664.1	1120000	342	0.447	40.7	0.0135863
CM016664.1	1130000	304	0.414	42.8	0.0154022
CM016664.1	1140000	256	0.396	44.1	0.0157014
CM016664.1	1150000	360	0.514	41.4	0.0134724
CM016664.1	1160000	381	0.85	42.1	0.0132595
CM016664.1	1170000	248	0.947	43.8	0.0125402
CM016664.1	1180000	177	0.643	43.1	0.0140659
CM016664.1	1190000	294	0.636	42.7	0.015621
CM016664.1	1200000	362	0.931	43.1	0.0147283
CM016664.1	1210000	332	0.877	41.5	0.014406
CM016664.1	1220000	382	0.673	40.7	0.0158208
CM016664.1	1230000	336	0.546	39.6	0.0166141
CM016664.1	1240000	291	0.71	41.1	0.0161809
CM016664.1	1250000	219	0.881	42.5	0.0162756
CM016664.1	1260000	236	0.661	43.3	0.0134933
CM016664.1	1270000	270	0.58	45.2	0.0136218
CM016664.1	1280000	324	0.681	46.8	0.0140106
CM016664.1	1290000	341	0.646	45.2	0.0134585
CM016664.1	1300000	185	0.541	39.7	0.0163076
CM016664.1	1310000	160	0.668	40.6	0.0156585
CM016664.1	1320000	297	0.948	43	0.0171009
CM016664.1	1330000	377	0.88	42.8	0.0164133
CM016664.1	1340000	333	0.804	40.7	0.0137315
CM016664.1	1350000	278	0.827	42	0.0152904
CM016664.1	1360000	310	0.836	43.2	0.0155777
CM016664.1	1370000	314	0.87	42.5	0.0129477
CM016664.1	1380000	293	0.704	42.5	0.0119653
CM016664.1	1390000	289	0.511	40.3	0.0155168
CM016664.1	1400000	317	0.59	39.4	0.0183085
CM016664.1	1410000	340	0.705	40.3	0.0181309
CM016664.1	1420000	377	0.79	40.6	0.0164024
CM016664.1	1430000	391	0.865	40.5	0.0150142
CM016664.1	1440000	339	0.91	40	0.014719
CM016664.1	1450000	333	0.709	40	0.015855
CM016664.1	1460000	185	0.257	41.3	0.0161823
CM016664.1	1470000	18	0.072	41.4	0.00717197
CM016664.1	1480000	21	0.069	39.7	0.00775099
CM016664.1	1490000	93	0.203	39.5	0.0138048
CM016664.1	1500000	308	0.527	42.1	0.0144627
CM016664.1	1510000	363	0.66	42.7	0.0142797
CM016664.1	1520000	277	0.525	42.3	0.0130431
CM016664.1	1530000	251	0.506	43.5	0.0129889
CM016664.1	1540000	199	0.472	42.4	0.0182024
CM016664.1	1550000	248	0.614	42.8	0.0155415
CM016664.1	1560000	326	0.91	42.8	0.0144856
CM016664.1	1570000	284	0.863	41.2	0.0164666
CM016664.1	1580000	266	0.843	40.9	0.0160624
CM016664.1	1590000	208	0.567	40.6	0.0149324
CM016664.1	1600000	156	0.325	39.6	0.0154989
CM016664.1	1610000	123	0.285	38.6	0.0183527
CM016664.1	1620000	33	0.089	35.9	0.0161092
CM016664.1	1630000	35	0.067	37.3	0.0136873
CM016664.1	1640000	240	0.461	40.8	0.0132906
CM016664.1	1650000	462	0.84	41.2	0.0141279
CM016664.1	1660000	478	0.927	41.1	0.0146845
CM016664.1	1670000	277	0.623	40.6	0.0150757
CM016664.1	1680000	279	0.605	39.9	0.0141645
CM016664.1	1690000	438	0.928	40.8	0.0142269
CM016664.1	1700000	338	0.806	40.6	0.0140728
CM016664.1	1710000	265	0.667	39	0.0150421
CM016664.1	1720000	181	0.378	38.1	0.0154544
CM016664.1	1730000	244	0.491	39.6	0.0136834
CM016664.1	1740000	391	0.908	41.1	0.0158991
CM016664.1	1750000	345	0.85	41.4	0.0166346
CM016664.1	1760000	353	0.822	40.6	0.0170067
CM016664.1	1770000	290	0.6	40.5	0.0168657
CM016664.1	1780000	286	0.551	39.7	0.0185445
CM016664.1	1790000	410	0.835	40	0.0171958
CM016664.1	1800000	423	0.834	39.9	0.0142004
CM016664.1	1810000	425	0.822	39.5	0.0170835
CM016664.1	1820000	362	0.73	39.9	0.0181964
CM016664.1	1830000	347	0.699	39.8	0.0156349
CM016664.1	1840000	278	0.61	40	0.0166962
CM016664.1	1850000	71	0.212	40.5	0.0199951
CM016664.1	1860000	185	0.36	40.7	0.014347
CM016664.1	1870000	368	0.782	41.4	0.0142513
CM016664.1	1880000	261	0.621	41.9	0.0149759
CM016664.1	1890000	78	0.198	42	0.0168805
CM016664.1	1900000	0	0.001	30.5	0
CM016664.1	1910000	128	0.29	38.3	0.0147596
CM016664.1	1920000	337	0.71	41.2	0.0160426
CM016664.1	1930000	394	0.804	42.5	0.0167227
CM016664.1	1940000	345	0.826	42.5	0.0150455
CM016664.1	1950000	411	0.889	44.1	0.0124408
CM016664.1	1960000	502	0.912	44.5	0.0146674
CM016664.1	1970000	466	0.891	43.6	0.0147371
CM016664.1	1980000	405	0.762	42.4	0.0124653
CM016664.1	1990000	353	0.688	41.1	0.013888
CM016664.1	2000000	380	0.793	42.2	0.0152259
CM016664.1	2010000	414	0.835	42.4	0.0142197
CM016664.1	2020000	399	0.879	42.5	0.0135066
CM016664.1	2030000	531	0.885	43.6	0.0153683
CM016664.1	2040000	506	0.74	41.8	0.0159212
CM016664.1	2050000	370	0.678	40.5	0.014636
CM016664.1	2060000	309	0.623	41.2	0.0139503
CM016664.1	2070000	396	0.578	42.9	0.0144351
CM016664.1	2080000	286	0.302	44.7	0.0135563
CM016664.1	2090000	6	0.009	32.3	0.0107508
CM016664.1	2100000	50	0.04	43.7	0.0112251
CM016664.1	2110000	117	0.222	42.8	0.0125519
CM016664.1	2120000	114	0.279	41.4	0.0145747
CM016664.1	2130000	219	0.514	40.3	0.0135209
CM016664.1	2140000	316	0.784	41.1	0.0131188
CM016664.1	2150000	369	0.801	41.7	0.0138052
CM016664.1	2160000	389	0.803	41	0.0143296
CM016664.1	2170000	309	0.708	41.4	0.0155683
CM016664.1	2180000	391	0.747	42.8	0.0148011
CM016664.1	2190000	378	0.72	43.6	0.0145118
CM016664.1	2200000	174	0.326	44.5	0.0156111
CM016664.1	2210000	76	0.136	45.1	0.0158401
CM016664.1	2220000	162	0.42	44.3	0.016099
CM016664.1	2230000	269	0.64	44	0.012699
CM016664.1	2240000	309	0.751	45.1	0.0109786
CM016664.1	2250000	295	0.825	45.4	0.0101032
CM016664.1	2260000	337	0.875	44.7	0.0105955
CM016664.1	2270000	376	0.869	44.6	0.0124055
CM016664.1	2280000	307	0.826	44.9	0.0142339
CM016664.1	2290000	277	0.857	45.1	0.0156829
CM016664.1	2300000	293	0.87	44.6	0.0158605
CM016664.1	2310000	320	0.878	44.9	0.0161021
CM016664.1	2320000	365	0.889	44.7	0.0147683
CM016664.1	2330000	398	0.805	43	0.0148623
CM016664.1	2340000	197	0.368	42	0.0158503
CM016664.1	2350000	165	0.409	44.9	0.0131341
CM016664.1	2360000	187	0.496	44.1	0.0134723
CM016664.1	2370000	30	0.101	39.1	0.0154427
CM016664.1	2380000	189	0.491	43.8	0.0145544
CM016664.1	2390000	318	0.905	43.1	0.0136846
CM016664.1	2400000	311	0.838	43.9	0.014293
CM016664.1	2410000	311	0.823	46	0.0152854
CM016664.1	2420000	282	0.854	45.1	0.0140452
CM016664.1	2430000	341	0.9	43.4	0.0130611
CM016664.1	2440000	357	0.894	42.8	0.01561
CM016664.1	2450000	347	0.895	43.1	0.0155868
CM016664.1	2460000	365	0.833	43.3	0.0135318
CM016664.1	2470000	416	0.85	44.2	0.0143547
CM016664.1	2480000	398	0.746	42.9	0.0157885
CM016664.1	2490000	378	0.667	42.1	0.0151291
CM016664.1	2500000	423	0.827	42.7	0.0154566
CM016664.1	2510000	450	0.848	41.3	0.015683
CM016664.1	2520000	487	0.825	41.6	0.0144395
CM016664.1	2530000	474	0.864	43.1	0.0133588
CM016664.1	2540000	409	0.833	42.7	0.012389
CM016664.1	2550000	361	0.74	41.6	0.0154899
CM016664.1	2560000	395	0.788	43	0.0162649
CM016664.1	2570000	442	0.851	42.5	0.0130442
CM016664.1	2580000	490	0.863	42	0.013937
CM016664.1	2590000	448	0.894	43.9	0.0147007
CM016664.1	2600000	370	0.847	43.8	0.0130749
CM016664.1	2610000	374	0.771	42.3	0.0128554
CM016664.1	2620000	372	0.742	42.4	0.0152441
CM016664.1	2630000	415	0.803	42.8	0.0172953
CM016664.1	2640000	312	0.614	42.1	0.0156968
CM016664.1	2650000	269	0.561	40.8	0.012505
CM016664.1	2660000	408	0.81	41.5	0.0137107
CM016664.1	2670000	488	0.9	43.3	0.0158257
CM016664.1	2680000	484	0.889	42.4	0.0139717
CM016664.1	2690000	422	0.856	41.7	0.0126701
CM016664.1	2700000	265	0.519	43.4	0.0162929
CM016664.1	2710000	285	0.427	44.2	0.0149162
CM016664.1	2720000	437	0.81	43.1	0.0151528
CM016664.1	2730000	431	0.899	42.4	0.0157662
CM016664.1	2740000	399	0.844	42.3	0.0139
CM016664.1	2750000	381	0.859	42.8	0.0133565
CM016664.1	2760000	317	0.738	42.5	0.0126459
CM016664.1	2770000	163	0.358	40.2	0.0107392
CM016664.1	2780000	209	0.373	41	0.0110544
CM016664.1	2790000	338	0.707	41.9	0.0127012
CM016664.1	2800000	180	0.41	41.9	0.013806
CM016664.1	2810000	196	0.352	43.2	0.0156939
CM016664.1	2820000	317	0.561	40.9	0.0159426
CM016664.1	2830000	132	0.251	37	0.0172595
CM016664.1	2840000	116	0.343	39.7	0.0161303
CM016664.1	2850000	279	0.732	40.8	0.0168216
CM016664.1	2860000	230	0.678	41.3	0.0166839
CM016664.1	2870000	196	0.633	41	0.0128682
CM016664.1	2880000	284	0.683	42	0.015661
CM016664.1	2890000	332	0.473	42.4	0.0173849
CM016664.1	2900000	624	0.573	51.9	0.0107205
CM016664.1	2910000	682	0.851	49.3	0.0107107
CM016664.1	2920000	310	0.589	42.4	0.0179189
CM016664.1	2930000	70	0.174	39.1	0.0307733
CM016664.1	2940000	87	0.075	64.3	0.0061044
CM016664.1	2950000	237	0.315	45.8	0.0141223
CM016664.1	2960000	164	0.327	38.9	0.0160895
CM016664.1	2970000	135	0.417	38.8	0.0141776
CM016664.1	2980000	336	0.848	40.5	0.0151059
CM016664.1	2990000	455	0.879	41.4	0.017266
CM016664.1	3000000	417	0.72	40.9	0.0172293
CM016664.1	3010000	302	0.584	41.3	0.014392
CM016664.1	3020000	142	0.272	42	0.0182878
CM016664.1	3030000	13	0.012	36.2	0.0485615
CM016664.1	3040000	78	0.057	42.1	0.0122255
CM016664.1	3050000	165	0.122	45.8	0.0113261
CM016664.1	3060000	191	0.163	42.8	0.0159944
CM016664.1	3070000	325	0.265	44.1	0.0145489
CM016664.1	3080000	224	0.179	46.3	0.0119109
CM016664.1	3090000	46	0.048	33.8	0.0926771
CM016664.1	3100000	99	0.137	37.8	0.0590099
CM016664.1	3110000	232	0.423	41.6	0.0135294
CM016664.1	3120000	322	0.607	42	0.0117459
CM016664.1	3130000	274	0.536	43.5	0.0113456
CM016664.1	3140000	313	0.583	42.4	0.0133293
CM016664.1	3150000	183	0.328	40.1	0.0149841
CM016664.1	3160000	0	0	0	0
CM016664.1	3170000	234	0.442	40.4	0.0166541
CM016664.1	3180000	444	0.898	43.1	0.0148821
CM016664.1	3190000	405	0.857	44.5	0.0152769
CM016664.1	3200000	323	0.584	41.7	0.0166904
CM016664.1	3210000	333	0.575	40.1	0.0154708
CM016664.1	3220000	386	0.699	40.4	0.0187975
CM016664.1	3230000	181	0.307	39.9	0.0214398
CM016664.1	3240000	0	0	30.1	0
CM016664.1	3250000	133	0.451	42.2	0.0188771
CM016664.1	3260000	331	0.934	42.9	0.015742
CM016664.1	3270000	321	0.906	42.4	0.0145735
CM016664.1	3280000	233	0.836	42	0.0152625
CM016664.1	3290000	284	0.855	42.8	0.0131897
CM016664.1	3300000	367	0.876	42.8	0.0126431
CM016664.1	3310000	351	0.85	41.5	0.0145726
CM016664.1	3320000	271	0.808	40.2	0.0181352
CM016664.1	3330000	167	0.554	42.2	0.0185531
CM016664.1	3340000	206	0.55	43.8	0.0145331
CM016664.1	3350000	268	0.741	43.2	0.0153069
CM016664.1	3360000	116	0.353	44.1	0.0166952
CM016664.1	3370000	0	0	30	0
CM016664.1	3380000	0	0	30	0
CM016664.1	3390000	202	0.307	39.6	0.0208864
CM016664.1	3400000	369	0.592	43	0.0185357
CM016664.1	3410000	264	0.411	44.6	0.0161453
CM016664.1	3420000	104	0.139	39.4	0.0210972
CM016664.1	3430000	193	0.253	37.9	0.0166035
CM016664.1	3440000	407	0.656	40.3	0.0138545
CM016664.1	3450000	373	0.691	42.3	0.0127566
CM016664.1	3460000	173	0.339	43.2	0.0120388
CM016664.1	3470000	21	0.063	42.8	0.0198886
CM016664.1	3480000	87	0.174	45.9	0.0208906
CM016664.1	3490000	227	0.546	43	0.0185118
CM016664.1	3500000	299	0.823	42.3	0.015034
CM016664.1	3510000	371	0.912	43.5	0.01373
CM016664.1	3520000	319	0.875	43.7	0.0147639
CM016664.1	3530000	320	0.818	42.5	0.0150076
CM016664.1	3540000	384	0.81	42.2	0.013267
CM016664.1	3550000	339	0.82	41.8	0.0148619
CM016664.1	3560000	366	0.835	41	0.0163202
CM016664.1	3570000	208	0.432	40.9	0.0149332
CM016664.1	3580000	82	0.154	38.5	0.0177933
CM016664.1	3590000	245	0.442	40.6	0.0189154
CM016664.1	3600000	387	0.645	40.3	0.0182435
CM016664.1	3610000	365	0.739	40.6	0.0160627
CM016664.1	3620000	329	0.879	42.5	0.0128628
CM016664.1	3630000	371	0.846	42.4	0.0127002
CM016664.1	3640000	410	0.83	42	0.0132918
CM016664.1	3650000	313	0.664	42.4	0.0138982
CM016664.1	3660000	213	0.435	42.8	0.0162043
CM016664.1	3670000	179	0.347	43.3	0.0241038
CM016664.1	3680000	102	0.194	42.1	0.0277584
CM016664.1	3690000	59	0.123	39.8	0.0167072
CM016664.1	3700000	26	0.048	39.4	0.0156692
CM016664.1	3710000	7	0.012	41.1	0.00791969
CM016664.1	3720000	94	0.239	44.9	0.00985031
CM016664.1	3730000	257	0.626	44.4	0.0117754
CM016664.1	3740000	362	0.688	43.8	0.0136511
CM016664.1	3750000	434	0.734	42.1	0.0141799
CM016664.1	3760000	419	0.744	41.1	0.0149819
CM016664.1	3770000	392	0.692	41	0.0142877
CM016664.1	3780000	274	0.513	41.4	0.0122
CM016664.1	3790000	154	0.322	40.4	0.0130645
CM016664.1	3800000	228	0.609	39.5	0.0153279
CM016664.1	3810000	207	0.552	40.4	0.015294
CM016664.1	3820000	106	0.211	41.3	0.0149509
CM016664.1	3830000	47	0.097	37.7	0.0153951
CM016664.1	3840000	34	0.034	35.1	0.0248593
CM016664.1	3850000	180	0.207	40.3	0.0146261
CM016664.1	3860000	331	0.337	40.6	0.0122315
CM016664.1	3870000	222	0.189	39.6	0.0116575
CM016664.1	3880000	155	0.209	37	0.0146103
CM016664.1	3890000	138	0.227	37.3	0.0145102
CM016664.1	3900000	333	0.384	50.3	0.0130691
CM016664.1	3910000	472	0.589	48.8	0.0128394
CM016664.1	3920000	232	0.375	43.4	0.0141835
CM016664.1	3930000	168	0.193	47.7	0.0147294
CM016664.1	3940000	124	0.104	52	0.0104159
CM016664.1	3950000	132	0.125	44.9	0.0128873
CM016664.1	3960000	115	0.11	45.9	0.0143113
CM016664.1	3970000	4	0.004	35.2	0.0432948
CM016664.1	3980000	22	0.045	34.9	0.0265939
CM016664.1	3990000	34	0.057	34.6	0.016425
CM016664.1	4000000	112	0.088	45.2	0.0223566
CM016664.1	4010000	196	0.153	44.9	0.0213055
CM016664.1	4020000	123	0.104	41.2	0.0167286
CM016664.1	4030000	135	0.158	44.7	0.0175767
CM016664.1	4040000	226	0.316	43.7	0.0171825
CM016664.1	4050000	240	0.386	41.4	0.0149338
CM016664.1	4060000	122	0.201	41.1	0.0129868
CM016664.1	4070000	32	0.03	37.9	0.0126978
CM016664.1	4080000	89	0.089	40	0.0097898
CM016664.1	4090000	103	0.098	43.4	0.00816064
CM016664.1	4100000	59	0.056	43.1	0.0130474
CM016664.1	4110000	17	0.032	35.8	0.0296931
CM016664.1	4120000	4	0.016	37.5	0.0248658
CM016664.1	4130000	58	0.028	35.4	0.00950839
CM016664.1	4140000	62	0.048	34.7	0.00843514
CM016664.1	4150000	125	0.281	40.6	0.0143493
CM016664.1	4160000	238	0.417	40.4	0.0150432
CM016664.1	4170000	219	0.448	41.3	0.0167067
CM016664.1	4180000	337	0.724	41.6	0.0167259
CM016664.1	4190000	387	0.746	42.2	0.0144443
CM016664.1	4200000	250	0.478	43.3	0.0164696
CM016664.1	4210000	99	0.165	42.2	0.0217099
CM016664.1	4220000	1	0.001	30.3	0.0126516
CM016664.1	4230000	0	0	0	0
CM016664.1	4240000	203	0.36	42.3	0.0136547
CM016664.1	4250000	403	0.736	42.7	0.0139379
CM016664.1	4260000	416	0.79	41.8	0.0141231
CM016664.1	4270000	461	0.867	41.4	0.014216
CM016664.1	4280000	268	0.498	42.1	0.0145851
CM016664.1	4290000	262	0.465	42.4	0.0152802
CM016664.1	4300000	508	0.886	43	0.014871
CM016664.1	4310000	487	0.944	42.6	0.0151482
CM016664.1	4320000	450	0.942	42.8	0.0146779
CM016664.1	4330000	516	0.93	42.9	0.0155855
CM016664.1	4340000	533	0.919	42.1	0.0190586
CM016664.1	4350000	539	0.755	43.1	0.018037
CM016664.1	4360000	447	0.616	42.9	0.0152193
CM016664.1	4370000	300	0.69	40.6	0.0149029
CM016664.1	4380000	240	0.586	41.5	0.0143994
CM016664.1	4390000	97	0.208	44.1	0.0135821
CM016664.1	4400000	62	0.2	38.4	0.011889
CM016664.1	4410000	210	0.621	40.6	0.0137913
CM016664.1	4420000	324	0.83	41.1	0.0168639
CM016664.1	4430000	384	0.837	40.3	0.0161933
CM016664.1	4440000	266	0.597	40.2	0.0144165
CM016664.1	4450000	273	0.522	40.7	0.0146209
CM016664.1	4460000	303	0.56	40.7	0.0144045
CM016664.1	4470000	88	0.207	40.3	0.0151878
CM016664.1	4480000	0	0	0	0
CM016664.1	4490000	6	0.016	36.3	0.0244664
CM016664.1	4500000	69	0.194	44.5	0.0173802
CM016664.1	4510000	95	0.302	43.1	0.0146701
CM016664.1	4520000	88	0.201	39	0.00900739
CM016664.1	4530000	411	0.403	45.4	0.0124282
CM016664.1	4540000	440	0.546	44.6	0.012672
CM016664.1	4550000	174	0.712	42.5	0.0118254
CM016664.1	4560000	183	0.939	42.3	0.0161776
CM016664.1	4570000	191	0.721	40.4	0.0194787
CM016664.1	4580000	115	0.333	39.4	0.0179178
CM016664.1	4590000	20	0.075	38.9	0.0119981
CM016664.1	4600000	2	0.016	34.2	0.00187455
CM016664.1	4610000	95	0.133	49.8	0.0103088
CM016664.1	4620000	95	0.133	49.8	0.0103088
CM016664.1	4630000	48	0.111	39.4	0.0196212
CM016664.1	4640000	203	0.423	40.2	0.018029
CM016664.1	4650000	321	0.69	40.8	0.0161697
CM016664.1	4660000	234	0.484	41.9	0.0137382
CM016664.1	4670000	165	0.481	41.8	0.011771
CM016664.1	4680000	114	0.463	40.4	0.0136061
CM016664.1	4690000	169	0.443	40.3	0.0157745
CM016664.1	4700000	177	0.401	40.2	0.0173507
CM016664.1	4710000	79	0.115	64.1	0.0201904
CM016664.1	4720000	114	0.127	76.5	0.0112799
CM016664.1	4730000	166	0.417	44.2	0.0183891
CM016664.1	4740000	226	0.629	39.3	0.0179631
CM016664.1	4750000	315	0.706	40	0.0175682
CM016664.1	4760000	299	0.677	41.2	0.0194483
CM016664.1	4770000	104	0.242	41.3	0.0197535
CM016664.1	4780000	253	0.14	48.7	0.011062
CM016664.1	4790000	482	0.509	42.2	0.0144262
CM016664.1	4800000	469	0.827	40.3	0.0149314
CM016664.1	4810000	322	0.546	41.7	0.0131741
CM016664.1	4820000	128	0.178	44.3	0.0147509
CM016664.1	4830000	100	0.189	39.6	0.0150908
CM016664.1	4840000	97	0.148	39.5	0.0163976
CM016664.1	4850000	198	0.35	49.2	0.015024
CM016664.1	4860000	215	0.491	45.8	0.0138122
CM016664.1	4870000	225	0.631	39	0.0127016
CM016664.1	4880000	323	0.781	38.7	0.0126443
CM016664.1	4890000	241	0.553	38.1	0.0142725
CM016664.1	4900000	252	0.46	39.2	0.0138216
CM016664.1	4910000	172	0.249	40.4	0.0124887
CM016664.1	4920000	3	0.003	31.4	0.0264733
CM016664.1	4930000	77	0.126	38.8	0.0179544
CM016664.1	4940000	107	0.179	39	0.0181688
CM016664.1	4950000	162	0.252	40	0.0144242
CM016664.1	4960000	155	0.229	39.9	0.0137381
CM016664.1	4970000	103	0.137	38.3	0.0155266
CM016664.1	4980000	207	0.271	41.9	0.0128328
CM016664.1	4990000	218	0.336	43.9	0.013454
CM016664.1	5000000	298	0.59	41	0.0149501
CM016664.1	5010000	355	0.646	40.8	0.0158241
CM016664.1	5020000	287	0.452	41.7	0.0154867
CM016664.1	5030000	249	0.513	41.2	0.0122185
CM016664.1	5040000	188	0.492	41.3	0.0179082
CM016664.1	5050000	84	0.213	40.7	0.0231056
CM016664.1	5060000	18	0.018	33.6	0.00717292
CM016664.1	5070000	58	0.086	36.6	0.0184087
CM016664.1	5080000	123	0.162	47.3	0.0146056
CM016664.1	5090000	124	0.145	57.4	0.00872508
CM016664.1	5100000	105	0.146	47.6	0.0160239
CM016664.1	5110000	261	0.446	42.6	0.0159221
CM016664.1	5120000	221	0.395	42.9	0.0141686
CM016664.1	5130000	137	0.292	40.9	0.0122543
CM016664.1	5140000	332	0.654	40.7	0.0140935
CM016664.1	5150000	469	0.821	41.2	0.0153945
CM016664.1	5160000	479	0.802	41.7	0.0145271
CM016664.1	5170000	465	0.821	42.5	0.0131202
CM016664.1	5180000	376	0.707	42.4	0.0149025
CM016664.1	5190000	415	0.731	43.7	0.0142156
CM016664.1	5200000	517	0.867	44.2	0.0140828
CM016664.1	5210000	481	0.84	42.8	0.015285
CM016664.1	5220000	437	0.755	42.4	0.0163928
CM016664.1	5230000	287	0.467	41.7	0.0176969
CM016664.1	5240000	325	0.538	43.2	0.0140078
CM016664.1	5250000	501	0.76	44.2	0.0125365
CM016664.1	5260000	552	0.777	43.5	0.0124097
CM016664.1	5270000	441	0.628	42.9	0.0125236
CM016664.1	5280000	160	0.227	42.9	0.0128025
CM016664.1	5290000	59	0.081	38.3	0.0160255
CM016664.1	5300000	311	0.322	40.6	0.0134622
CM016664.1	5310000	297	0.315	41	0.0124802
CM016664.1	5320000	45	0.074	39.5	0.0115455
CM016664.1	5330000	152	0.222	38.4	0.0174438
CM016664.1	5340000	370	0.646	41.6	0.0160395
CM016664.1	5350000	353	0.657	42.6	0.0149643
CM016664.1	5360000	394	0.629	43.7	0.0134284
CM016664.1	5370000	499	0.871	44	0.0127621
CM016664.1	5380000	447	0.785	42.9	0.0125066
CM016664.1	5390000	324	0.493	41.9	0.013492
CM016664.1	5400000	328	0.65	42.9	0.0147836
CM016664.1	5410000	379	0.854	43.5	0.0135653
CM016664.1	5420000	297	0.651	42.4	0.013938
CM016664.1	5430000	317	0.643	43.3	0.0146803
CM016664.1	5440000	369	0.82	44.2	0.014504
CM016664.1	5450000	181	0.442	44.1	0.0147126
CM016664.1	5460000	63	0.123	43.5	0.0123108
CM016664.1	5470000	268	0.549	45.8	0.0128141
CM016664.1	5480000	412	0.89	44.4	0.0124612
CM016664.1	5490000	420	0.86	42.6	0.0119411
CM016664.1	5500000	445	0.792	43.2	0.0113912
CM016664.1	5510000	426	0.861	44.5	0.0111235
CM016664.1	5520000	404	0.907	43.7	0.0144964
CM016664.1	5530000	420	0.914	42.9	0.0150685
CM016664.1	5540000	421	0.881	42.8	0.0122167
CM016664.1	5550000	501	0.878	43.6	0.0144279
CM016664.1	5560000	483	0.918	43.2	0.0154101
CM016664.1	5570000	367	0.752	42.7	0.0140808
CM016664.1	5580000	191	0.336	44.5	0.0182162
CM016664.1	5590000	36	0.079	39.2	0.0278168
CM016664.1	5600000	200	0.43	43	0.0121338
CM016664.1	5610000	452	0.814	44.5	0.0118861
CM016664.1	5620000	514	0.902	45.5	0.0112251
CM016664.1	5630000	439	0.914	45.4	0.0129777
CM016664.1	5640000	441	0.885	43.2	0.0155447
CM016664.1	5650000	474	0.849	42.9	0.0151363
CM016664.1	5660000	441	0.823	43.5	0.0149651
CM016664.1	5670000	336	0.707	41.6	0.0143731
CM016664.1	5680000	150	0.347	40.9	0.0126657
CM016664.1	5690000	300	0.435	41.2	0.0151075
CM016664.1	5700000	461	0.784	41.5	0.0164741
CM016664.1	5710000	187	0.406	42.1	0.0179089
CM016664.1	5720000	208	0.358	44.5	0.0136229
CM016664.1	5730000	409	0.678	44.2	0.0183648
CM016664.1	5740000	473	0.799	44.3	0.0162264
CM016664.1	5750000	538	0.913	43.9	0.0141497
CM016664.1	5760000	493	0.817	41.5	0.0181653
CM016664.1	5770000	463	0.774	41	0.0171182
CM016664.1	5780000	387	0.574	41.7	0.0150065
CM016664.1	5790000	412	0.637	41.2	0.0144559
CM016664.1	5800000	312	0.554	42.4	0.0137338
CM016664.1	5810000	79	0.183	44.5	0.0168568
CM016664.1	5820000	141	0.292	42.7	0.0167799
CM016664.1	5830000	115	0.214	42.2	0.0158149
CM016664.1	5840000	2	0.005	30.5	0.00739571
CM016664.1	5850000	149	0.305	41	0.0157784
CM016664.1	5860000	255	0.707	43.1	0.0156732
CM016664.1	5870000	108	0.406	44.6	0.015822
CM016664.1	5880000	110	0.168	66.7	0.0162076
CM016664.1	5890000	129	0.212	67.7	0.0163653
CM016664.1	5900000	107	0.145	48.7	0.033725
CM016664.1	5910000	94	0.117	38.4	0.0340978
CM016664.1	5920000	252	0.385	39.1	0.0142895
CM016664.1	5930000	358	0.62	40.1	0.015339
CM016664.1	5940000	114	0.257	41.1	0.0171437
CM016664.1	5950000	107	0.203	40	0.0158784
CM016664.1	5960000	330	0.66	42.4	0.015332
CM016664.1	5970000	490	0.925	44.4	0.0133905
CM016664.1	5980000	421	0.719	44.2	0.0122088
CM016664.1	5990000	344	0.559	42.9	0.0278953
CM016664.1	6000000	474	0.521	45.2	0.0457314
CM016664.1	6010000	318	0.257	45.8	0.0473787
CM016664.1	6020000	112	0.092	46.8	0.0192899
CM016664.1	6030000	78	0.054	53.5	0.016948
CM016664.1	6040000	20	0.031	33	0.0121958
CM016664.1	6050000	33	0.039	34.9	0.0120944
CM016664.1	6060000	85	0.072	38.7	0.0141667
CM016664.1	6070000	96	0.091	39.6	0.0212439
CM016664.1	6080000	319	0.48	45.8	0.018607
CM016664.1	6090000	435	0.678	44.8	0.0151944
CM016664.1	6100000	140	0.23	42.1	0.0116876
CM016664.1	6110000	0	0	0	0
CM016664.1	6120000	189	0.371	46.3	0.017991
CM016664.1	6130000	404	0.758	45.5	0.0151923
CM016664.1	6140000	368	0.692	45.2	0.0130338
CM016664.1	6150000	428	0.734	44.2	0.0152037
CM016664.1	6160000	360	0.615	42.8	0.015582
CM016664.1	6170000	216	0.394	42.1	0.0150303
CM016664.1	6180000	376	0.615	42.7	0.0146165
CM016664.1	6190000	336	0.63	43.9	0.0137186
CM016664.1	6200000	291	0.677	43.9	0.0114645
CM016664.1	6210000	406	0.898	44.1	0.0121034
CM016664.1	6220000	482	0.876	43.9	0.0135409
CM016664.1	6230000	451	0.73	43.3	0.0135755
CM016664.1	6240000	344	0.716	45.1	0.0127737
CM016664.1	6250000	454	0.792	46.5	0.0135105
CM016664.1	6260000	353	0.517	46.1	0.0155466
CM016664.1	6270000	125	0.247	42.1	0.0151807
CM016664.1	6280000	57	0.107	41	0.0131005
CM016664.1	6290000	10	0.035	36.2	0.0190767
CM016664.1	6300000	169	0.329	42.6	0.0159052
CM016664.1	6310000	178	0.346	42.8	0.0153643
CM016664.1	6320000	140	0.389	43	0.0188399
CM016664.1	6330000	121	0.339	43.4	0.0201929
CM016664.1	6340000	1	0.01	36.4	0.0113852
CM016664.1	6350000	1	0.01	36.4	0.0113852
CM016664.1	6360000	1	0.001	30.8	0.0110031
CM016664.1	6370000	73	0.047	41.3	0.0143665
CM016664.1	6380000	184	0.293	42.5	0.0128469
CM016664.1	6390000	287	0.637	42.6	0.012357
CM016664.1	6400000	398	0.86	43.5	0.0142092
CM016664.1	6410000	404	0.957	44.3	0.01547
CM016664.1	6420000	382	0.965	44.1	0.0144089
CM016664.1	6430000	385	0.944	44.5	0.0158666
CM016664.1	6440000	353	0.893	44.3	0.0157851
CM016664.1	6450000	395	0.827	41.2	0.0132878
CM016664.1	6460000	390	0.851	40.9	0.0124996
CM016664.1	6470000	350	0.876	42.3	0.0137694
CM016664.1	6480000	371	0.877	42.4	0.0136839
CM016664.1	6490000	359	0.854	42.5	0.0122097
CM016664.1	6500000	338	0.802	41.3	0.0127524
CM016664.1	6510000	399	0.765	40.4	0.0131066
CM016664.1	6520000	418	0.761	41.3	0.0143539
CM016664.1	6530000	360	0.787	42.4	0.0173746
CM016664.1	6540000	345	0.762	41	0.0176294
CM016664.1	6550000	345	0.73	39.6	0.0131092
CM016664.1	6560000	199	0.406	40.6	0.0108478
CM016664.1	6570000	110	0.29	39	0.0140632
CM016664.1	6580000	128	0.402	38.5	0.0148831
CM016664.1	6590000	63	0.254	37.9	0.0155703
CM016664.1	6600000	141	0.402	37.7	0.0184699
CM016664.1	6610000	301	0.701	40	0.0155001
CM016664.1	6620000	293	0.682	40.6	0.0162111
CM016664.1	6630000	110	0.288	39.9	0.0209942
CM016664.1	6640000	4	0.006	32.2	0.0222007
CM016664.1	6650000	4	0.006	32.2	0.0222007
CM016664.1	6660000	0	0	0	0
CM016664.1	6670000	24	0.036	33.6	0.063948
CM016664.1	6680000	24	0.036	33.6	0.063948
CM016664.1	6690000	5	0.009	39.1	0.0157564
CM016664.1	6700000	50	0.211	39.8	0.0132511
CM016664.1	6710000	290	0.603	42	0.0133984
CM016664.1	6720000	431	0.732	40.9	0.0135756
CM016664.1	6730000	368	0.78	39.2	0.0146134
CM016664.1	6740000	339	0.686	40.3	0.0144119
CM016664.1	6750000	249	0.548	41	0.0129284
CM016664.1	6760000	162	0.553	40.9	0.0119759
CM016664.1	6770000	160	0.493	38.6	0.0146612
CM016664.1	6780000	207	0.492	38.1	0.0211827
CM016664.1	6790000	258	0.589	40.3	0.0187548
CM016664.1	6800000	267	0.719	41.5	0.0151269
CM016664.1	6810000	157	0.458	41.5	0.0197366
CM016664.1	6820000	31	0.09	38.5	0.0339327
CM016664.1	6830000	9	0.015	33.2	0.0299427
CM016664.1	6840000	209	0.33	38.4	0.016978
CM016664.1	6850000	398	0.676	39.7	0.0145164
CM016664.1	6860000	329	0.808	40.6	0.0117536
CM016664.1	6870000	162	0.544	40.5	0.0117271
CM016664.1	6880000	36	0.107	39.4	0.0242452
CM016664.1	6890000	36	0.076	37.2	0.026755
CM016664.1	6900000	228	0.489	41.5	0.0171951
CM016664.1	6910000	381	0.779	41.8	0.0144996
CM016664.1	6920000	378	0.702	40.8	0.0158228
CM016664.1	6930000	444	0.834	42.4	0.0186769
CM016664.1	6940000	477	0.907	43.2	0.016044
CM016664.1	6950000	483	0.908	43.5	0.0142704
CM016664.1	6960000	498	0.902	42.9	0.015889
CM016664.1	6970000	302	0.525	40.5	0.0169902
CM016664.1	6980000	106	0.165	42.2	0.0193512
CM016664.1	6990000	133	0.204	42.7	0.0199803
CM016664.1	7000000	391	0.555	42.3	0.0151188
CM016664.1	7010000	310	0.419	42.5	0.0139702
CM016664.1	7020000	33	0.048	42.1	0.0148212
CM016664.1	7030000	51	0.09	38.3	0.0158542
CM016664.1	7040000	196	0.419	38.5	0.0196813
CM016664.1	7050000	414	0.77	39.6	0.0197704
CM016664.1	7060000	461	0.796	39.8	0.0200662
CM016664.1	7070000	231	0.421	39.7	0.0193889
CM016664.1	7080000	14	0.034	38.4	0.00787571
CM016664.1	7090000	2	0.003	30.5	0.00601903
CM016664.1	7100000	28	0.04	63.2	0.0335953
CM016664.1	7110000	28	0.04	63.2	0.0335953
CM016664.1	7120000	23	0.039	37.7	0.0219552
CM016664.1	7130000	235	0.468	39.7	0.0154723
CM016664.1	7140000	436	0.903	40.4	0.0145699
CM016664.1	7150000	460	0.92	41.3	0.0161803
CM016664.1	7160000	356	0.674	41	0.0151117
CM016664.1	7170000	154	0.301	37.8	0.0100313
CM016664.1	7180000	222	0.455	39	0.016473
CM016664.1	7190000	301	0.586	40.7	0.0169014
CM016664.1	7200000	336	0.652	42.1	0.0172344
CM016664.1	7210000	483	0.937	42.1	0.0160058
CM016664.1	7220000	383	0.732	40.9	0.0136386
CM016664.1	7230000	312	0.665	41.7	0.0122067
CM016664.1	7240000	351	0.837	42.1	0.0148971
CM016664.1	7250000	305	0.791	41.7	0.0171633
CM016664.1	7260000	334	0.82	42.7	0.0150153
CM016664.1	7270000	438	0.891	41.9	0.0133212
CM016664.1	7280000	277	0.539	40.7	0.0135231
CM016664.1	7290000	30	0.092	39.4	0.0174345
CM016664.1	7300000	0	0	0	0
CM016664.1	7310000	182	0.306	43.4	0.013981
CM016664.1	7320000	389	0.711	42	0.0138308
CM016664.1	7330000	373	0.79	41.4	0.0137497
CM016664.1	7340000	389	0.781	41.2	0.0133598
CM016664.1	7350000	350	0.816	40.7	0.0117059
CM016664.1	7360000	251	0.789	42.4	0.0115996
CM016664.1	7370000	242	0.768	42.9	0.0137426
CM016664.1	7380000	256	0.771	41.3	0.0114285
CM016664.1	7390000	171	0.431	40.1	0.0112492
CM016664.1	7400000	56	0.136	37.6	0.0197164
CM016664.1	7410000	143	0.462	41.6	0.015217
CM016664.1	7420000	187	0.561	42.4	0.0153225
CM016664.1	7430000	218	0.494	40.7	0.0228108
CM016664.1	7440000	350	0.67	40.6	0.0182005
CM016664.1	7450000	388	0.719	40.2	0.0145605
CM016664.1	7460000	261	0.485	38.8	0.0151635
CM016664.1	7470000	190	0.368	39.8	0.0140028
CM016664.1	7480000	139	0.276	39.9	0.0152643
CM016664.1	7490000	89	0.197	36.6	0.0150264
CM016664.1	7500000	98	0.227	36.7	0.0117207
CM016664.1	7510000	36	0.08	35.5	0.0117925
CM016664.1	7520000	119	0.257	39.6	0.0170928
CM016664.1	7530000	245	0.577	39.8	0.0153604
CM016664.1	7540000	262	0.645	38.2	0.0137768
CM016664.1	7550000	315	0.703	39.6	0.0158575
CM016664.1	7560000	319	0.804	40.6	0.0180614
CM016664.1	7570000	286	0.795	39.8	0.0143121
CM016664.1	7580000	370	0.846	41	0.0139605
CM016664.1	7590000	418	0.92	42	0.0155925
CM016664.1	7600000	368	0.841	41.6	0.0149457
CM016664.1	7610000	373	0.837	40	0.0142029
CM016664.1	7620000	306	0.654	39.9	0.0137719
CM016664.1	7630000	115	0.227	40.5	0.01248
CM016664.1	7640000	56	0.149	34.8	0.0199908
CM016664.1	7650000	42	0.114	34.6	0.0254724
CM016664.1	7660000	46	0.098	84.3	0.00835204
CM016664.1	7670000	68	0.115	77.9	0.0116388
CM016664.1	7680000	70	0.028	73.6	0.0133714
CM016664.1	7690000	110	0.051	62.7	0.016504
CM016664.1	7700000	62	0.04	45.7	0.0186068
CM016664.1	7710000	38	0.059	42.4	0.0137665
CM016664.1	7720000	388	0.403	79.3	0.0104352
CM016664.1	7730000	453	0.515	73.6	0.0120189
CM016664.1	7740000	127	0.211	49.1	0.0222245
CM016664.1	7750000	25	0.042	46.2	0.00902032
CM016664.1	7760000	11	0.027	32.6	0.0166601
CM016664.1	7770000	330	0.368	44.2	0.00938002
CM016664.1	7780000	419	0.819	42.1	0.0113721
CM016664.1	7790000	307	0.803	40	0.0152874
CM016664.1	7800000	287	0.537	39.7	0.0172713
CM016664.1	7810000	229	0.587	39.5	0.0162752
CM016664.1	7820000	331	0.848	41.1	0.0118287
CM016664.1	7830000	354	0.941	42.4	0.0118091
CM016664.1	7840000	317	0.914	42.4	0.0133668
CM016664.1	7850000	322	0.811	40.7	0.0156684
CM016664.1	7860000	291	0.616	38.3	0.0162076
CM016664.1	7870000	211	0.398	38.9	0.0139671
CM016664.1	7880000	99	0.152	41.8	0.0123375
CM016664.1	7890000	17	0.027	32	0.00992663
CM016664.1	7900000	88	0.203	43.3	0.0119759
CM016664.1	7910000	307	0.646	42.2	0.0127098
CM016664.1	7920000	436	0.841	40.8	0.0159248
CM016664.1	7930000	201	0.372	40.3	0.0187293
CM016664.1	7940000	168	0.348	39.6	0.013167
CM016664.1	7950000	243	0.468	39.2	0.0150874
CM016664.1	7960000	80	0.154	37.9	0.017285
CM016664.1	7970000	247	0.483	42.1	0.0156992
CM016664.1	7980000	399	0.842	42.8	0.016177
CM016664.1	7990000	345	0.777	42.3	0.0167584
CM016664.1	8000000	375	0.738	42.7	0.0151862
CM016664.1	8010000	512	0.786	42.8	0.0107819
CM016664.1	8020000	496	0.837	41.3	0.0123048
CM016664.1	8030000	293	0.761	41	0.0168019
CM016664.1	8040000	334	0.819	42.2	0.0166212
CM016664.1	8050000	421	0.909	43.5	0.012319
CM016664.1	8060000	523	0.885	43.5	0.0123927
CM016664.1	8070000	479	0.853	43.8	0.0145985
CM016664.1	8080000	396	0.896	44.1	0.0129433
CM016664.1	8090000	450	0.926	41.8	0.014726
CM016664.1	8100000	413	0.918	42.5	0.014523
CM016664.1	8110000	436	0.653	44.7	0.0127227
CM016664.1	8120000	461	0.659	42.7	0.014327
CM016664.1	8130000	422	0.954	43	0.0139989
CM016664.1	8140000	349	0.85	43.8	0.0141058
CM016664.1	8150000	245	0.816	42.3	0.0140345
CM016664.1	8160000	170	0.643	41.4	0.0125106
CM016664.1	8170000	196	0.501	42.5	0.0113999
CM016664.1	8180000	230	0.556	42	0.0127661
CM016664.1	8190000	317	0.744	43.7	0.0153208
CM016664.1	8200000	294	0.721	43.5	0.016903
CM016664.1	8210000	232	0.722	42.1	0.0158589
CM016664.1	8220000	165	0.537	42.6	0.0148841
CM016664.1	8230000	15	0.05	37.6	0.0197255
CM016664.1	8240000	133	0.262	40.7	0.0203977
CM016664.1	8250000	354	0.745	42.5	0.0149189
CM016664.1	8260000	342	0.711	42.4	0.0129593
CM016664.1	8270000	322	0.653	40.7	0.0146898
CM016664.1	8280000	381	0.816	41.7	0.0156138
CM016664.1	8290000	405	0.845	41.8	0.0162619
CM016664.1	8300000	451	0.889	41.8	0.014168
CM016664.1	8310000	459	0.855	42.2	0.0111115
CM016664.1	8320000	476	0.841	41.2	0.011217
CM016664.1	8330000	334	0.656	40.4	0.0148793
CM016664.1	8340000	91	0.235	40.3	0.0211328
CM016664.1	8350000	120	0.223	40.3	0.0118292
CM016664.1	8360000	310	0.544	41	0.0145167
CM016664.1	8370000	288	0.491	40.6	0.0153891
CM016664.1	8380000	346	0.642	41.7	0.0114574
CM016664.1	8390000	391	0.886	41.7	0.0117041
CM016664.1	8400000	256	0.741	40.7	0.014194
CM016664.1	8410000	304	0.743	41	0.0122241
CM016664.1	8420000	194	0.428	40.9	0.0104297
CM016664.1	8430000	35	0.045	43.5	0.0329254
CM016664.1	8440000	55	0.054	48.1	0.0369279
CM016664.1	8450000	23	0.022	49.3	0.0336102
CM016664.1	8460000	140	0.37	43.4	0.0106973
CM016664.1	8470000	347	0.721	43.2	0.0110094
CM016664.1	8480000	426	0.774	43	0.0141486
CM016664.1	8490000	366	0.685	43.1	0.0167257
CM016664.1	8500000	340	0.653	43.7	0.0151226
CM016664.1	8510000	463	0.871	42.6	0.0130173
CM016664.1	8520000	473	0.919	42.6	0.0156693
CM016664.1	8530000	413	0.927	43.5	0.0167024
CM016664.1	8540000	380	0.93	44.1	0.0132611
CM016664.1	8550000	259	0.637	45	0.0126296
CM016664.1	8560000	210	0.387	44.6	0.0161319
CM016664.1	8570000	122	0.199	44.1	0.018264
CM016664.1	8580000	40	0.095	44.5	0.0255779
CM016664.1	8590000	141	0.464	45	0.0192441
CM016664.1	8600000	211	0.548	44.8	0.0109542
CM016664.1	8610000	275	0.506	42.3	0.0115013
CM016664.1	8620000	368	0.686	40.7	0.0135118
CM016664.1	8630000	343	0.741	40.8	0.0151463
CM016664.1	8640000	343	0.794	41.4	0.0144458
CM016664.1	8650000	257	0.585	41.5	0.0117192
CM016664.1	8660000	358	0.597	42.7	0.0148327
CM016664.1	8670000	519	0.861	44.2	0.015268
CM016664.1	8680000	357	0.702	43.8	0.0136142
CM016664.1	8690000	312	0.556	41.6	0.0118488
CM016664.1	8700000	409	0.763	42.9	0.0145726
CM016664.1	8710000	390	0.926	44.8	0.0159192
CM016664.1	8720000	336	0.793	44.6	0.0136441
CM016664.1	8730000	445	0.695	43.2	0.0118336
CM016664.1	8740000	510	0.756	43.7	0.0104292
CM016664.1	8750000	460	0.833	44	0.0119565
CM016664.1	8760000	406	0.839	44.7	0.0126852
CM016664.1	8770000	451	0.804	43.6	0.0133663
CM016664.1	8780000	504	0.874	42.8	0.0148503
CM016664.1	8790000	445	0.89	42.8	0.0150916
CM016664.1	8800000	453	0.852	41.7	0.0137198
CM016664.1	8810000	424	0.877	41.9	0.0141037
CM016664.1	8820000	328	0.902	42.3	0.013625
CM016664.1	8830000	362	0.909	42.7	0.0135845
CM016664.1	8840000	351	0.709	41.9	0.0129939
CM016664.1	8850000	301	0.67	42.8	0.0115765
CM016664.1	8860000	152	0.411	45.4	0.0126301
CM016664.1	8870000	2	0.004	31.2	0.00839439
CM016664.1	8880000	38	0.136	44.5	0.0122518
CM016664.1	8890000	223	0.494	44.6	0.0154579
CM016664.1	8900000	332	0.823	44.3	0.0136951
CM016664.1	8910000	349	0.934	43.8	0.0128319
CM016664.1	8920000	431	0.858	42.1	0.0143525
CM016664.1	8930000	338	0.613	41.5	0.0146845
CM016664.1	8940000	186	0.367	43.7	0.0127822
CM016664.1	8950000	75	0.139	44.2	0.00938999
CM016664.1	8960000	16	0.021	37.6	0.0164138
CM016664.1	8970000	288	0.489	41.5	0.0134289
CM016664.1	8980000	284	0.504	41.6	0.012976
CM016664.1	8990000	12	0.036	41.1	0.00631988
CM016664.1	9000000	0	0.002	30.6	0
CM016664.1	9010000	2	0.009	32	0.0249826
CM016664.1	9020000	193	0.44	43.4	0.0131475
CM016664.1	9030000	461	0.847	42.4	0.0147624
CM016664.1	9040000	276	0.419	41.1	0.0164733
CM016664.1	9050000	56	0.13	42.6	0.0204633
CM016664.1	9060000	61	0.164	42.5	0.0184676
CM016664.1	9070000	169	0.446	41.9	0.013117
CM016664.1	9080000	158	0.41	42	0.0133475
CM016664.1	9090000	0	0.002	30.6	0
CM016664.1	9100000	8	0.025	39.2	0.00642966
CM016664.1	9110000	223	0.406	42.9	0.0145956
CM016664.1	9120000	398	0.816	44.2	0.0133181
CM016664.1	9130000	258	0.549	45.1	0.0136362
CM016664.1	9140000	341	0.569	44.4	0.0167508
CM016664.1	9150000	471	0.895	43.1	0.0183056
CM016664.1	9160000	404	0.791	41.4	0.0209267
CM016664.1	9170000	336	0.585	40.8	0.018136
CM016664.1	9180000	382	0.593	40.7	0.0156766
CM016664.1	9190000	441	0.804	40.7	0.0142083
CM016664.1	9200000	423	0.913	42.1	0.012737
CM016664.1	9210000	369	0.717	41.9	0.0149732
CM016664.1	9220000	410	0.733	41.6	0.0145906
CM016664.1	9230000	519	0.943	43.7	0.0126713
CM016664.1	9240000	430	0.841	43.4	0.013597
CM016664.1	9250000	348	0.813	41.2	0.0147481
CM016664.1	9260000	347	0.801	41.2	0.0139718
CM016664.1	9270000	330	0.661	40.8	0.0176424
CM016664.1	9280000	351	0.704	41	0.0164349
CM016664.1	9290000	237	0.481	42.3	0.0138517
CM016664.1	9300000	216	0.478	42	0.0156669
CM016664.1	9310000	443	0.878	42.5	0.013149
CM016664.1	9320000	358	0.576	44	0.012704
CM016664.1	9330000	93	0.111	48	0.0144824
CM016664.1	9340000	2	0.008	44.5	0.0389288
CM016664.1	9350000	2	0.008	44.5	0.0389288
CM016664.1	9360000	44	0.058	41	0.0181364
CM016664.1	9370000	90	0.202	40.8	0.0175402
CM016664.1	9380000	160	0.264	55.6	0.0143508
CM016664.1	9390000	231	0.32	52.7	0.0134772
CM016664.1	9400000	230	0.635	40.3	0.0138447
CM016664.1	9410000	302	0.857	40.8	0.0131492
CM016664.1	9420000	346	0.659	41.5	0.0123091
CM016664.1	9430000	291	0.445	41	0.012917
CM016664.1	9440000	134	0.208	40.2	0.0145622
CM016664.1	9450000	71	0.207	40.5	0.0146842
CM016664.1	9460000	231	0.646	41.2	0.0129854
CM016664.1	9470000	211	0.611	41.6	0.0120624
CM016664.1	9480000	87	0.288	41.9	0.0114359
CM016664.1	9490000	102	0.25	42.6	0.0133974
CM016664.1	9500000	66	0.135	43	0.0151702
CM016664.1	9510000	12	0.009	32.4	0.00667192
CM016664.1	9520000	12	0.009	32.4	0.00667192
CM016664.1	9530000	65	0.218	41.3	0.0193724
CM016664.1	9540000	249	0.579	42.9	0.0158037
CM016664.1	9550000	372	0.814	42.7	0.0141937
CM016664.1	9560000	352	0.849	42	0.0145261
CM016664.1	9570000	326	0.728	41.7	0.0140511
CM016664.1	9580000	238	0.592	39.9	0.0140116
CM016664.1	9590000	188	0.516	38.3	0.0171024
CM016664.1	9600000	122	0.264	38.1	0.017525
CM016664.1	9610000	163	0.297	39.5	0.0140511
CM016664.1	9620000	187	0.392	39	0.0129489
CM016664.1	9630000	54	0.132	37.1	0.00959133
CM016664.1	9640000	187	0.362	40.4	0.0134104
CM016664.1	9650000	356	0.702	41.3	0.0145055
CM016664.1	9660000	377	0.761	40.4	0.014251
CM016664.1	9670000	352	0.738	41.4	0.0114451
CM016664.1	9680000	358	0.746	41.7	0.0133353
CM016664.1	9690000	352	0.782	38.9	0.0158782
CM016664.1	9700000	387	0.805	39.5	0.0158432
CM016664.1	9710000	421	0.793	40.8	0.0175507
CM016664.1	9720000	421	0.77	40	0.0177112
CM016664.1	9730000	402	0.822	40.4	0.0160935
CM016664.1	9740000	379	0.828	42	0.0147199
CM016664.1	9750000	453	0.778	42.5	0.0141101
CM016664.1	9760000	338	0.567	43.2	0.0139481
CM016664.1	9770000	312	0.577	40	0.0159231
CM016664.1	9780000	430	0.768	38.8	0.0146691
CM016664.1	9790000	418	0.716	39.4	0.0129152
CM016664.1	9800000	370	0.66	39.3	0.0144595
CM016664.1	9810000	397	0.741	40.1	0.0151936
CM016664.1	9820000	501	0.83	40	0.0136762
CM016664.1	9830000	456	0.77	38.9	0.0126237
CM016664.1	9840000	402	0.704	39.2	0.0132572
CM016664.1	9850000	565	0.77	42.4	0.0135267
CM016664.1	9860000	531	0.874	43	0.014957
CM016664.1	9870000	274	0.615	43.1	0.015749
CM016664.1	9880000	145	0.297	42.7	0.0125006
CM016664.1	9890000	258	0.528	41.1	0.0141925
CM016664.1	9900000	217	0.393	41.8	0.0148627
CM016664.1	9910000	7	0.004	31.1	0.0163951
CM016664.1	9920000	0	0.001	30.9	0
CM016664.1	9930000	10	0.032	46	0.0359698
CM016664.1	9940000	10	0.032	46	0.0359698
CM016664.1	9950000	36	0.083	41.4	0.0158728
CM016664.1	9960000	223	0.34	41.2	0.0119436
CM016664.1	9970000	382	0.592	41.5	0.0126912
CM016664.1	9980000	378	0.696	41.6	0.0126802
CM016664.1	9990000	364	0.764	41.5	0.0120828
CM016664.1	10000000	452	0.878	42.3	0.0130996
CM016664.1	10010000	495	0.864	42.5	0.0135558
CM016664.1	10020000	279	0.542	42.1	0.0137715
CM016664.1	10030000	163	0.298	40.5	0.0122496
CM016664.1	10040000	111	0.15	38.2	0.0120889
CM016664.1	10050000	153	0.304	40.4	0.0156152
CM016664.1	10060000	244	0.488	39.7	0.0155591
CM016664.1	10070000	235	0.457	40.6	0.0153666
CM016664.1	10080000	219	0.374	40.8	0.0140959
CM016664.1	10090000	80	0.112	37.6	0.0114794
CM016664.1	10100000	2	0.006	32.1	0.00652043
CM016664.1	10110000	0	0	0	0
CM016664.1	10120000	39	0.085	41.7	0.0143431
CM016664.1	10130000	300	0.522	40.5	0.015179
CM016664.1	10140000	393	0.681	41.2	0.0149609
CM016664.1	10150000	338	0.648	40.6	0.0146661
CM016664.1	10160000	401	0.783	40	0.0157652
CM016664.1	10170000	420	0.815	40.3	0.0171288
CM016664.1	10180000	417	0.894	40.6	0.0149675
CM016664.1	10190000	436	0.895	41.5	0.0129756
CM016664.1	10200000	314	0.61	41.6	0.0135049
CM016664.1	10210000	82	0.189	40.4	0.0159169
CM016664.1	10220000	19	0.027	36	0.0282985
CM016664.1	10230000	80	0.113	38.7	0.0137457
CM016664.1	10240000	327	0.446	45.5	0.0116484
CM016664.1	10250000	474	0.678	53.1	0.011235
CM016664.1	10260000	222	0.361	57	0.0109774
CM016664.1	10270000	10	0.039	31.9	0.0168555
CM016664.1	10280000	37	0.037	47.9	0.0129578
CM016664.1	10290000	161	0.441	41.7	0.0138261
CM016664.1	10300000	262	0.795	40.9	0.0149299
CM016664.1	10310000	251	0.673	39.6	0.0150366
CM016664.1	10320000	172	0.462	37.2	0.0149067
CM016664.1	10330000	145	0.43	39	0.0185979
CM016664.1	10340000	148	0.368	42.1	0.0206197
CM016664.1	10350000	136	0.299	43.5	0.0138265
CM016664.1	10360000	277	0.607	40.4	0.0131611
CM016664.1	10370000	430	0.804	39.5	0.0162231
CM016664.1	10380000	463	0.741	39.7	0.0154586
CM016664.1	10390000	403	0.731	41.6	0.0133834
CM016664.1	10400000	378	0.765	42.5	0.0125502
CM016664.1	10410000	385	0.69	41.3	0.0117898
CM016664.1	10420000	417	0.724	40.6	0.0133904
CM016664.1	10430000	463	0.791	40.8	0.0137919
CM016664.1	10440000	283	0.47	39.8	0.0128093
CM016664.1	10450000	221	0.445	41.2	0.0133792
CM016664.1	10460000	269	0.53	41.4	0.0139431
CM016664.1	10470000	345	0.6	39.5	0.0161438
CM016664.1	10480000	373	0.88	40.3	0.0146519
CM016664.1	10490000	174	0.636	41	0.0126236
CM016664.1	10500000	43	0.173	41	0.0193113
CM016664.1	10510000	0	0	0	0
CM016664.1	10520000	0	0	0	0
CM016664.1	10530000	0	0	0	0
CM016664.1	10540000	4	0.03	42.1	0.0139732
CM016664.1	10550000	99	0.252	41.3	0.0131111
CM016664.1	10560000	258	0.609	40.9	0.0175319
CM016664.1	10570000	200	0.468	40.8	0.0188178
CM016664.1	10580000	294	0.409	44.2	0.0125602
CM016664.1	10590000	505	0.764	42.7	0.013025
CM016664.1	10600000	614	0.887	42.5	0.0120539
CM016664.1	10610000	476	0.652	42.9	0.0130478
CM016664.1	10620000	141	0.248	39.6	0.0188275
CM016664.1	10630000	232	0.191	39.1	0.0126188
CM016664.1	10640000	254	0.285	40.8	0.0107305
CM016664.1	10650000	55	0.144	40.9	0.0102565
CM016664.1	10660000	4	0.012	33.4	0.0190591
CM016664.1	10670000	7	0.016	34	0.0277477
CM016664.1	10680000	6	0.022	34.1	0.0345636
CM016664.1	10690000	21	0.039	36.5	0.0111746
CM016664.1	10700000	207	0.482	41	0.0129069
CM016664.1	10710000	390	0.857	40.4	0.0115127
CM016664.1	10720000	421	0.728	40	0.0142263
CM016664.1	10730000	449	0.722	40.4	0.0165419
CM016664.1	10740000	388	0.643	39.3	0.0143456
CM016664.1	10750000	414	0.677	40.3	0.0130244
CM016664.1	10760000	411	0.675	40.7	0.0135776
CM016664.1	10770000	248	0.403	39.4	0.0171265
CM016664.1	10780000	94	0.157	40.3	0.0207196
CM016664.1	10790000	0	0	0	0
CM016664.1	10800000	24	0.046	37.9	0.0131349
CM016664.1	10810000	253	0.394	39	0.0138947
CM016664.1	10820000	425	0.645	40.4	0.0138335
CM016664.1	10830000	453	0.725	41.3	0.014536
CM016664.1	10840000	386	0.658	40.9	0.014398
CM016664.1	10850000	293	0.54	39.4	0.0156314
CM016664.1	10860000	318	0.69	40	0.0142528
CM016664.1	10870000	298	0.724	40.4	0.0127869
CM016664.1	10880000	298	0.559	39.3	0.0158747
CM016664.1	10890000	344	0.63	40.3	0.0141164
CM016664.1	10900000	398	0.85	40.1	0.0159374
CM016664.1	10910000	415	0.855	40.5	0.0171989
CM016664.1	10920000	356	0.815	42.2	0.0174412
CM016664.1	10930000	308	0.667	44.1	0.0194066
CM016664.1	10940000	159	0.273	46	0.0188786
CM016664.1	10950000	2	0.018	42.4	0.0167886
CM016664.1	10960000	126	0.353	41.7	0.014326
CM016664.1	10970000	261	0.697	40.3	0.0130184
CM016664.1	10980000	317	0.735	40.8	0.0125537
CM016664.1	10990000	425	0.804	41.7	0.0135917
CM016664.1	11000000	440	0.796	41.8	0.013129
CM016664.1	11010000	392	0.723	42.9	0.0127881
CM016664.1	11020000	267	0.438	48.4	0.0153576
CM016664.1	11030000	102	0.155	72.3	0.0159547
CM016664.1	11040000	264	0.419	58.4	0.00947626
CM016664.1	11050000	356	0.671	48.9	0.0122566
CM016664.1	11060000	124	0.328	42.1	0.0156487
CM016664.1	11070000	0	0	30	0
CM016664.1	11080000	43	0.072	43.5	0.0343427
CM016664.1	11090000	43	0.073	43.4	0.0343427
CM016664.1	11100000	115	0.206	38.4	0.0104604
CM016664.1	11110000	118	0.261	37.8	0.0109299
CM016664.1	11120000	253	0.321	38.1	0.0140457
CM016664.1	11130000	443	0.42	46.2	0.0125053
CM016664.1	11140000	300	0.262	54.3	0.0112906
CM016664.1	11150000	175	0.16	48.4	0.0131897
CM016664.1	11160000	87	0.064	48.4	0.0109735
CM016664.1	11170000	44	0.035	35.8	0.00960798
CM016664.1	11180000	130	0.065	56.6	0.0103383
CM016664.1	11190000	135	0.095	49.3	0.0100032
CM016664.1	11200000	305	0.361	41.3	0.0131119
CM016664.1	11210000	321	0.328	42.6	0.0130845
CM016664.1	11220000	48	0.021	42.1	0.0142223
CM016664.1	11230000	2	0.004	30.3	0.0344828
CM016664.1	11240000	117	0.184	39.8	0.0154809
CM016664.1	11250000	196	0.249	42.2	0.0119909
CM016664.1	11260000	86	0.074	47.1	0.00840474
CM016664.1	11270000	18	0.04	77.4	0.0117346
CM016664.1	11280000	293	0.338	59.9	0.0177917
CM016664.1	11290000	460	0.496	54.5	0.0209702
CM016664.1	11300000	208	0.274	47.3	0.0233649
CM016664.1	11310000	236	0.492	42.2	0.0150087
CM016664.1	11320000	344	0.855	42.1	0.0147695
CM016664.1	11330000	253	0.899	42.2	0.0146343
CM016664.1	11340000	219	0.842	43.4	0.0168412
CM016664.1	11350000	223	0.621	42.3	0.0159074
CM016664.1	11360000	236	0.49	40	0.0151589
CM016664.1	11370000	187	0.408	40.2	0.0161562
CM016664.1	11380000	336	0.541	44	0.0146103
CM016664.1	11390000	499	0.831	44.8	0.0143663
CM016664.1	11400000	357	0.677	42.6	0.0183178
CM016664.1	11410000	417	0.712	43.2	0.0154964
CM016664.1	11420000	498	0.88	43.3	0.011628
CM016664.1	11430000	353	0.722	42	0.0128277
CM016664.1	11440000	338	0.786	43	0.014434
CM016664.1	11450000	381	0.87	42.1	0.015888
CM016664.1	11460000	387	0.796	40.8	0.01528
CM016664.1	11470000	342	0.827	41.8	0.0154347
CM016664.1	11480000	334	0.793	41.7	0.0133346
CM016664.1	11490000	469	0.759	40	0.0126642
CM016664.1	11500000	485	0.811	39.7	0.0136561
CM016664.1	11510000	397	0.788	40.3	0.0129499
CM016664.1	11520000	377	0.741	40.5	0.0143141
CM016664.1	11530000	383	0.728	39.6	0.0168598
CM016664.1	11540000	311	0.513	39.7	0.0163097
CM016664.1	11550000	249	0.349	43	0.0116554
CM016664.1	11560000	272	0.475	41.9	0.0133598
CM016664.1	11570000	361	0.732	42.5	0.0149101
CM016664.1	11580000	396	0.822	42.8	0.0142941
CM016664.1	11590000	194	0.432	41	0.0130044
CM016664.1	11600000	76	0.289	41	0.0165433
CM016664.1	11610000	198	0.567	40.1	0.0224324
CM016664.1	11620000	307	0.718	40.2	0.0184435
CM016664.1	11630000	372	0.792	41	0.0176213
CM016664.1	11640000	399	0.873	41.2	0.0188885
CM016664.1	11650000	288	0.832	41.3	0.0164923
CM016664.1	11660000	236	0.679	40.7	0.0155469
CM016664.1	11670000	311	0.715	41.8	0.014706
CM016664.1	11680000	382	0.856	42.9	0.0156829
CM016664.1	11690000	379	0.919	43	0.0155867
CM016664.1	11700000	357	0.942	43.5	0.0145617
CM016664.1	11710000	362	0.911	43.1	0.014568
CM016664.1	11720000	388	0.846	41.7	0.0130339
CM016664.1	11730000	329	0.773	41.1	0.0163472
CM016664.1	11740000	211	0.553	41.1	0.0169278
CM016664.1	11750000	280	0.335	48.4	0.0101637
CM016664.1	11760000	391	0.27	49.7	0.0150671
CM016664.1	11770000	311	0.31	39.6	0.0163427
CM016664.1	11780000	400	0.461	52.6	0.0133928
CM016664.1	11790000	293	0.265	62.2	0.0127465
CM016664.1	11800000	65	0.063	50	0.0122751
CM016664.1	11810000	102	0.105	46.3	0.0137394
CM016664.1	11820000	86	0.161	42.4	0.0113823
CM016664.1	11830000	52	0.148	41.1	0.00823637
CM016664.1	11840000	246	0.427	43.4	0.011166
CM016664.1	11850000	447	0.7	43.3	0.0127123
CM016664.1	11860000	363	0.522	42.5	0.013995
CM016664.1	11870000	270	0.476	42.4	0.0150328
CM016664.1	11880000	289	0.628	42.3	0.0150755
CM016664.1	11890000	403	0.806	42.4	0.0134672
CM016664.1	11900000	398	0.908	42.3	0.0131349
CM016664.1	11910000	185	0.492	42.1	0.0132901
CM016664.1	11920000	83	0.206	40.8	0.0125632
CM016664.1	11930000	242	0.564	40.3	0.0124365
CM016664.1	11940000	258	0.529	39.9	0.0148855
CM016664.1	11950000	310	0.587	42.5	0.0136904
CM016664.1	11960000	466	0.848	42.9	0.0127911
CM016664.1	11970000	253	0.441	42.9	0.0138482
CM016664.1	11980000	287	0.441	44.4	0.0111581
CM016664.1	11990000	313	0.469	43.5	0.0137903
CM016664.1	12000000	53	0.094	37	0.0266989
CM016664.1	12010000	50	0.084	37.1	0.0131737
CM016664.1	12020000	249	0.496	42.9	0.0151575
CM016664.1	12030000	405	0.851	42.6	0.013798
CM016664.1	12040000	281	0.541	41.2	0.0126614
CM016664.1	12050000	234	0.188	42.1	0.0132696
CM016664.1	12060000	142	0.049	49.1	0.0121458
CM016664.1	12070000	0	0.001	31	0
CM016664.1	12080000	1	0.002	30.7	0.0304521
CM016664.1	12090000	79	0.149	37.9	0.0143162
CM016664.1	12100000	269	0.536	41	0.0161901
CM016664.1	12110000	311	0.604	41.7	0.0186563
CM016664.1	12120000	227	0.431	39.9	0.0183711
CM016664.1	12130000	207	0.408	40.5	0.0153498
CM016664.1	12140000	172	0.295	41.2	0.0161655
CM016664.1	12150000	216	0.418	39.5	0.0153333
CM016664.1	12160000	299	0.774	41.5	0.0137323
CM016664.1	12170000	327	0.917	43.2	0.0166697
CM016664.1	12180000	366	0.94	43.3	0.0159082
CM016664.1	12190000	325	0.813	41.6	0.0130164
CM016664.1	12200000	295	0.682	39.9	0.0130822
CM016664.1	12210000	364	0.736	41.1	0.0139049
CM016664.1	12220000	215	0.404	41.7	0.0143148
CM016664.1	12230000	15	0.018	37.5	0.0128167
CM016664.1	12240000	20	0.033	42.4	0.00830524
CM016664.1	12250000	249	0.412	41.4	0.0154197
CM016664.1	12260000	372	0.766	41	0.0160705
CM016664.1	12270000	158	0.434	40.2	0.0153435
CM016664.1	12280000	59	0.061	37.9	0.0112526
CM016664.1	12290000	44	0.014	43	0.011602
CM016664.1	12300000	184	0.294	42.1	0.0194164
CM016664.1	12310000	334	0.507	41.3	0.0168622
CM016664.1	12320000	188	0.302	41.8	0.013686
CM016664.1	12330000	39	0.09	45.3	0.0130558
CM016664.1	12340000	1	0	30.3	0.0198991
CM016664.1	12350000	28	0.04	42.1	0.00799829
CM016664.1	12360000	133	0.21	43.6	0.00976134
CM016664.1	12370000	164	0.275	42.9	0.010855
CM016664.1	12380000	178	0.218	42.9	0.0143995
CM016664.1	12390000	397	0.449	44	0.0121738
CM016664.1	12400000	283	0.369	44	0.0107661
CM016664.1	12410000	79	0.338	40.8	0.00891854
CM016664.1	12420000	313	0.489	42	0.0106508
CM016664.1	12430000	322	0.378	42.6	0.0120517
CM016664.1	12440000	233	0.561	39.7	0.01589
CM016664.1	12450000	439	0.796	41.4	0.014578
CM016664.1	12460000	454	0.897	42.3	0.013941
CM016664.1	12470000	265	0.749	40.9	0.0141965
CM016664.1	12480000	220	0.66	41.4	0.0139124
CM016664.1	12490000	339	0.774	42	0.014178
CM016664.1	12500000	369	0.729	41.7	0.0134092
CM016664.1	12510000	314	0.691	42.2	0.0129103
CM016664.1	12520000	328	0.668	42	0.0132587
CM016664.1	12530000	317	0.649	40	0.0131911
CM016664.1	12540000	308	0.742	40.6	0.0125168
CM016664.1	12550000	302	0.69	41.7	0.0149239
CM016664.1	12560000	337	0.638	41	0.0164403
CM016664.1	12570000	401	0.743	41.7	0.0158683
CM016664.1	12580000	308	0.683	41.2	0.0145096
CM016664.1	12590000	268	0.657	42.3	0.0139904
CM016664.1	12600000	397	0.832	43.4	0.0138985
CM016664.1	12610000	384	0.896	41.8	0.014797
CM016664.1	12620000	350	0.835	40.9	0.0145547
CM016664.1	12630000	355	0.756	40.5	0.0143072
CM016664.1	12640000	344	0.707	39.9	0.0150951
CM016664.1	12650000	392	0.8	40.5	0.0145433
CM016664.1	12660000	407	0.753	39.9	0.0153458
CM016664.1	12670000	371	0.6	40.3	0.0142555
CM016664.1	12680000	191	0.326	41.9	0.013187
CM016664.1	12690000	301	0.313	41.6	0.0145899
CM016664.1	12700000	441	0.625	41.2	0.0152626
CM016664.1	12710000	161	0.363	40.5	0.0160609
CM016664.1	12720000	31	0.084	64	0.0109302
CM016664.1	12730000	89	0.16	57.2	0.0119162
CM016664.1	12740000	63	0.092	47	0.0126407
CM016664.1	12750000	45	0.053	44.9	0.0159853
CM016664.1	12760000	54	0.071	42.7	0.0149306
CM016664.1	12770000	229	0.465	43.7	0.0137168
CM016664.1	12780000	458	0.859	42.7	0.0145033
CM016664.1	12790000	412	0.844	40.5	0.0159802
CM016664.1	12800000	233	0.537	40.1	0.016383
CM016664.1	12810000	331	0.462	41.5	0.0151303
CM016664.1	12820000	455	0.713	40.9	0.0143385
CM016664.1	12830000	261	0.554	40.8	0.0121514
CM016664.1	12840000	140	0.302	40.1	0.0189212
CM016664.1	12850000	96	0.166	38.1	0.0252054
CM016664.1	12860000	34	0.063	39.9	0.0156444
CM016664.1	12870000	112	0.138	46.6	0.0170378
CM016664.1	12880000	210	0.313	62.3	0.0177194
CM016664.1	12890000	104	0.184	73	0.0174145
CM016664.1	12900000	50	0.065	37.5	0.0156121
CM016664.1	12910000	200	0.338	38.9	0.0146239
CM016664.1	12920000	328	0.655	39.9	0.0135569
CM016664.1	12930000	324	0.705	40.7	0.0146958
CM016664.1	12940000	362	0.67	41.2	0.0148637
CM016664.1	12950000	290	0.559	39.1	0.0130568
CM016664.1	12960000	147	0.408	37.4	0.0140344
CM016664.1	12970000	100	0.232	38.6	0.0172642
CM016664.1	12980000	83	0.197	34.4	0.0134064
CM016664.1	12990000	103	0.405	34.8	0.0133098
CM016664.1	13000000	327	0.704	39.7	0.0129239
CM016664.1	13010000	562	0.845	42	0.0144678
CM016664.1	13020000	558	0.824	41.8	0.0163206
CM016664.1	13030000	489	0.838	41.4	0.0146328
CM016664.1	13040000	350	0.767	39.9	0.0135756
CM016664.1	13050000	382	0.84	41.4	0.0134456
CM016664.1	13060000	443	0.906	42.2	0.0124008
CM016664.1	13070000	364	0.866	40.8	0.0132186
CM016664.1	13080000	336	0.827	41	0.0152616
CM016664.1	13090000	556	0.808	45.8	0.0119032
CM016664.1	13100000	472	0.797	46	0.0103519
CM016664.1	13110000	240	0.653	41.6	0.0132955
CM016664.1	13120000	322	0.617	39.9	0.014145
CM016664.1	13130000	443	0.752	39.6	0.0145977
CM016664.1	13140000	461	0.694	39.9	0.0145138
CM016664.1	13150000	514	0.739	39.8	0.0170968
CM016664.1	13160000	563	0.849	39.7	0.0180541
CM016664.1	13170000	443	0.862	40.1	0.0165714
CM016664.1	13180000	416	0.855	40.8	0.0141134
CM016664.1	13190000	311	0.734	39.9	0.0129904
CM016664.1	13200000	177	0.573	38.3	0.0148142
CM016664.1	13210000	144	0.473	37	0.0188345
CM016664.1	13220000	197	0.534	37.1	0.0196446
CM016664.1	13230000	278	0.67	38.6	0.0159521
CM016664.1	13240000	305	0.74	40.2	0.0167661
CM016664.1	13250000	197	0.464	41.5	0.0167151
CM016664.1	13260000	145	0.339	44.3	0.013247
CM016664.1	13270000	314	0.668	42.6	0.0146267
CM016664.1	13280000	396	0.843	42.1	0.0154754
CM016664.1	13290000	352	0.812	41.8	0.0167545
CM016664.1	13300000	327	0.823	41.6	0.0160444
CM016664.1	13310000	155	0.422	41.9	0.016551
CM016664.1	13320000	15	0.025	35.9	0.021496
CM016664.1	13330000	24	0.039	37.6	0.0140197
CM016664.1	13340000	11	0.022	40.2	0.0112811
CM016664.1	13350000	35	0.066	43.6	0.0136482
CM016664.1	13360000	255	0.472	41.7	0.0170705
CM016664.1	13370000	446	0.805	40.3	0.0185963
CM016664.1	13380000	443	0.811	39.1	0.0175329
CM016664.1	13390000	433	0.812	38.8	0.0151546
CM016664.1	13400000	315	0.608	39.6	0.0167795
CM016664.1	13410000	114	0.216	41.3	0.0220962
CM016664.1	13420000	129	0.216	43.1	0.0195522
CM016664.1	13430000	141	0.256	42	0.0184278
CM016664.1	13440000	27	0.049	35.5	0.0239602
CM016664.1	13450000	51	0.076	38	0.0225024
CM016664.1	13460000	356	0.518	41.8	0.0172488
CM016664.1	13470000	493	0.687	40.9	0.015716
CM016664.1	13480000	456	0.575	39.1	0.015192
CM016664.1	13490000	578	0.733	41.7	0.0159226
CM016664.1	13500000	586	0.785	41.9	0.0143843
CM016664.1	13510000	526	0.715	40.8	0.0135195
CM016664.1	13520000	535	0.719	40.1	0.0140927
CM016664.1	13530000	538	0.711	40.6	0.012795
CM016664.1	13540000	336	0.466	41.7	0.0124124
CM016664.1	13550000	83	0.142	40.2	0.0136214
CM016664.1	13560000	1	0.005	34.7	0.00046916
CM016664.1	13570000	253	0.407	42.2	0.013442
CM016664.1	13580000	526	0.853	43.7	0.0132371
CM016664.1	13590000	570	0.864	42.8	0.0142186
CM016664.1	13600000	551	0.784	40.7	0.0154502
CM016664.1	13610000	534	0.713	40	0.0143988
CM016664.1	13620000	507	0.665	40.5	0.013854
CM016664.1	13630000	534	0.733	41.4	0.0164623
CM016664.1	13640000	462	0.671	40.6	0.0166113
CM016664.1	13650000	156	0.262	40.1	0.013864
CM016664.1	13660000	0	0	30	0
CM016664.1	13670000	152	0.308	42.7	0.0158517
CM016664.1	13680000	155	0.314	42.6	0.0157757
CM016664.1	13690000	104	0.261	41.8	0.0139162
CM016664.1	13700000	287	0.643	43	0.0126147
CM016664.1	13710000	247	0.449	43.1	0.0128187
CM016664.1	13720000	157	0.221	37.3	0.0148115
CM016664.1	13730000	309	0.538	39.7	0.0140647
CM016664.1	13740000	404	0.758	40.1	0.0172541
CM016664.1	13750000	381	0.806	40.5	0.0192797
CM016664.1	13760000	331	0.806	41.5	0.0170486
CM016664.1	13770000	162	0.437	41.2	0.0178015
CM016664.1	13780000	217	0.439	40.5	0.0164582
CM016664.1	13790000	420	0.757	40.2	0.0169285
CM016664.1	13800000	268	0.478	39.6	0.0177557
CM016664.1	13810000	151	0.42	38.8	0.0167262
CM016664.1	13820000	263	0.669	39.6	0.015412
CM016664.1	13830000	253	0.703	39.9	0.0157324
CM016664.1	13840000	260	0.747	40.7	0.0142437
CM016664.1	13850000	377	0.79	42.1	0.0161346
CM016664.1	13860000	325	0.571	42.3	0.0160645
CM016664.1	13870000	262	0.526	40.6	0.0160173
CM016664.1	13880000	411	0.816	42.9	0.0152365
CM016664.1	13890000	432	0.925	43.2	0.0125631
CM016664.1	13900000	406	0.87	40.9	0.0146492
CM016664.1	13910000	426	0.758	39.5	0.0155578
CM016664.1	13920000	413	0.69	39.4	0.0144101
CM016664.1	13930000	399	0.669	44.2	0.0127786
CM016664.1	13940000	452	0.811	45	0.0130658
CM016664.1	13950000	545	0.931	44	0.0131094
CM016664.1	13960000	421	0.718	43.4	0.0116076
CM016664.1	13970000	295	0.623	41.1	0.012491
CM016664.1	13980000	384	0.805	42.2	0.0144374
CM016664.1	13990000	296	0.625	42.1	0.0145484
CM016664.1	14000000	183	0.439	43.1	0.0174916
CM016664.1	14010000	320	0.665	44.3	0.0156908
CM016664.1	14020000	340	0.729	43.5	0.0143837
CM016664.1	14030000	317	0.624	42.9	0.0147986
CM016664.1	14040000	444	0.747	44.3	0.0134021
CM016664.1	14050000	390	0.758	44.3	0.0127283
CM016664.1	14060000	247	0.535	41.9	0.0108614
CM016664.1	14070000	316	0.52	90	0.00801749
CM016664.1	14080000	222	0.319	121.8	0.00870972
CM016664.1	14090000	41	0.041	43.1	0.0149152
CM016664.1	14100000	5	0.008	31.4	0.0437145
CM016664.1	14110000	0	0.004	30.9	0
CM016664.1	14120000	0	0.001	30	0
CM016664.1	14130000	0	0.004	30.4	0
CM016664.1	14140000	97	0.145	53.3	0.0138183
CM016664.1	14150000	231	0.569	44.6	0.0153352
CM016664.1	14160000	243	0.757	40.6	0.0154187
CM016664.1	14170000	202	0.618	40.6	0.0166812
CM016664.1	14180000	97	0.294	41.7	0.0188834
CM016664.1	14190000	17	0.057	41.8	0.0109414
CM016664.1	14200000	201	0.226	43.5	0.0105656
CM016664.1	14210000	278	0.477	41.1	0.0116019
CM016664.1	14220000	220	0.767	40.2	0.0138265
CM016664.1	14230000	249	0.699	40.1	0.0165737
CM016664.1	14240000	149	0.309	39.4	0.0198382
CM016664.1	14250000	143	0.141	41	0.0137109
CM016664.1	14260000	156	0.121	41.1	0.0195849
CM016664.1	14270000	129	0.146	37.6	0.0254203
CM016664.1	14280000	266	0.492	39.4	0.0145337
CM016664.1	14290000	216	0.539	40.4	0.0111195
CM016664.1	14300000	165	0.5	39.7	0.0127621
CM016664.1	14310000	282	0.724	39.7	0.0134047
CM016664.1	14320000	215	0.514	40	0.0126846
CM016664.1	14330000	251	0.458	39.8	0.0145049
CM016664.1	14340000	446	0.681	40.3	0.0159461
CM016664.1	14350000	512	0.777	41.3	0.0162646
CM016664.1	14360000	568	0.831	41.2	0.0151541
CM016664.1	14370000	497	0.742	40.9	0.0138794
CM016664.1	14380000	241	0.467	40.8	0.0138626
CM016664.1	14390000	295	0.498	41	0.0135425
CM016664.1	14400000	371	0.538	41	0.0142485
CM016664.1	14410000	162	0.235	39.1	0.0164902
CM016664.1	14420000	141	0.214	38.7	0.0158202
CM016664.1	14430000	220	0.301	38.7	0.0146829
CM016664.1	14440000	108	0.13	38.1	0.0124706
CM016664.1	14450000	179	0.231	38.3	0.0158489
CM016664.1	14460000	439	0.628	40	0.0181508
CM016664.1	14470000	486	0.756	41	0.0169129
CM016664.1	14480000	305	0.475	41.3	0.0157
CM016664.1	14490000	81	0.121	41.9	0.0207582
CM016664.1	14500000	2	0.005	30.9	0.00719396
CM016664.1	14510000	66	0.059	39.2	0.0181068
CM016664.1	14520000	232	0.283	41.8	0.0171247
CM016664.1	14530000	258	0.349	40.5	0.0157148
CM016664.1	14540000	254	0.34	38.9	0.0145617
CM016664.1	14550000	169	0.226	39.7	0.0142731
CM016664.1	14560000	65	0.088	41.1	0.00701457
CM016664.1	14570000	107	0.149	38.3	0.0147318
CM016664.1	14580000	163	0.243	35.8	0.0221809
CM016664.1	14590000	152	0.22	36.5	0.0186606
CM016664.1	14600000	38	0.049	36.1	0.0118954
CM016664.1	14610000	138	0.165	41.4	0.0154509
CM016664.1	14620000	166	0.304	38.2	0.0151077
CM016664.1	14630000	28	0.14	34.4	0.0137872
CM016664.1	14640000	51	0.074	34.7	0.0197617
CM016664.1	14650000	330	0.512	41.6	0.0162844
CM016664.1	14660000	584	0.845	42.5	0.0156214
CM016664.1	14670000	542	0.766	41.3	0.0151101
CM016664.1	14680000	438	0.704	41.6	0.0154645
CM016664.1	14690000	418	0.819	42.1	0.0142349
CM016664.1	14700000	355	0.904	42.3	0.0138771
CM016664.1	14710000	321	0.821	42	0.0168349
CM016664.1	14720000	183	0.393	40.6	0.0170661
CM016664.1	14730000	0	0	30	0
CM016664.1	14740000	60	0.118	40.1	0.0156841
CM016664.1	14750000	221	0.45	40.2	0.0172463
CM016664.1	14760000	426	0.726	39.7	0.0173559
CM016664.1	14770000	447	0.615	39.2	0.0158153
CM016664.1	14780000	410	0.587	40.5	0.0146509
CM016664.1	14790000	443	0.788	42.9	0.016002
CM016664.1	14800000	507	0.824	43.6	0.0130429
CM016664.1	14810000	636	0.814	41.9	0.013546
CM016664.1	14820000	580	0.829	41.5	0.0142289
CM016664.1	14830000	379	0.629	42.4	0.0115627
CM016664.1	14840000	410	0.573	51.4	0.0119347
CM016664.1	14850000	542	0.792	50.5	0.0133916
CM016664.1	14860000	499	0.711	46	0.0145568
CM016664.1	14870000	489	0.696	43.7	0.014048
CM016664.1	14880000	522	0.805	42.3	0.0122262
CM016664.1	14890000	500	0.755	42.4	0.0117764
CM016664.1	14900000	459	0.629	42.4	0.0122832
CM016664.1	14910000	439	0.357	44.9	0.0108003
CM016664.1	14920000	311	0.259	43.3	0.0119799
CM016664.1	14930000	315	0.566	41.6	0.0141629
CM016664.1	14940000	432	0.817	42.5	0.0135628
CM016664.1	14950000	432	0.84	43.4	0.0153177
CM016664.1	14960000	409	0.793	44	0.0166321
CM016664.1	14970000	397	0.758	42.3	0.0149114
CM016664.1	14980000	482	0.765	42.5	0.014202
CM016664.1	14990000	478	0.778	42.5	0.0133999
CM016664.1	15000000	478	0.863	41.8	0.0134791
CM016664.1	15010000	427	0.64	41.6	0.0162684
CM016664.1	15020000	160	0.177	39.7	0.0190497
CM016664.1	15030000	88	0.15	43.5	0.0149413
CM016664.1	15040000	302	0.55	43.3	0.0132294
CM016664.1	15050000	270	0.515	42.5	0.0127697
CM016664.1	15060000	252	0.487	41	0.0173589
CM016664.1	15070000	371	0.672	41.4	0.0172942
CM016664.1	15080000	361	0.681	42.8	0.0152661
CM016664.1	15090000	366	0.78	43.4	0.0145041
CM016664.1	15100000	305	0.685	40.6	0.0139241
CM016664.1	15110000	234	0.632	38.1	0.0167565
CM016664.1	15120000	235	0.585	39.3	0.0170468
CM016664.1	15130000	269	0.599	39.5	0.0147493
CM016664.1	15140000	331	0.611	41	0.0149025
CM016664.1	15150000	294	0.398	42.7	0.0188814
CM016664.1	15160000	283	0.49	41	0.0197069
CM016664.1	15170000	267	0.413	47.3	0.0136735
CM016664.1	15180000	207	0.204	65.1	0.0119486
CM016664.1	15190000	265	0.156	61.4	0.0122492
CM016664.1	15200000	320	0.311	44.1	0.0143018
CM016664.1	15210000	355	0.625	40.4	0.0153945
CM016664.1	15220000	415	0.718	39.1	0.0131718
CM016664.1	15230000	429	0.813	40.9	0.0124568
CM016664.1	15240000	398	0.832	42.2	0.0139937
CM016664.1	15250000	374	0.7	40.9	0.0176323
CM016664.1	15260000	332	0.663	41.2	0.0157198
CM016664.1	15270000	321	0.736	41.5	0.0109367
CM016664.1	15280000	427	0.78	40.6	0.0129414
CM016664.1	15290000	395	0.601	39.5	0.015064
CM016664.1	15300000	356	0.508	38.9	0.0158119
CM016664.1	15310000	544	0.748	40.5	0.0173325
CM016664.1	15320000	399	0.545	40.2	0.0175339
CM016664.1	15330000	358	0.477	39	0.0140403
CM016664.1	15340000	598	0.793	40.7	0.0150087
CM016664.1	15350000	579	0.821	40.8	0.0160456
CM016664.1	15360000	535	0.718	40.1	0.0158951
CM016664.1	15370000	316	0.361	40.3	0.0153667
CM016664.1	15380000	90	0.092	39.5	0.0123316
CM016664.1	15390000	51	0.057	38.8	0.0107355
CM016664.1	15400000	0	0	0	0
CM016664.1	15410000	66	0.085	37.3	0.0138137
CM016664.1	15420000	215	0.407	37.8	0.0142145
CM016664.1	15430000	394	0.708	38.8	0.0150856
CM016664.1	15440000	498	0.734	42.5	0.0158407
CM016664.1	15450000	474	0.704	43.4	0.0161016
CM016664.1	15460000	228	0.365	40.6	0.015903
CM016664.1	15470000	10	0.02	32.4	0.0169162
CM016664.1	15480000	29	0.05	36.4	0.0171056
CM016664.1	15490000	26	0.041	37.6	0.0163298
CM016664.1	15500000	0	0.001	30.8	0
CM016664.1	15510000	208	0.293	40.4	0.0130504
CM016664.1	15520000	493	0.671	40.9	0.0134286
CM016664.1	15530000	534	0.735	41.2	0.0149904
CM016664.1	15540000	471	0.743	41.4	0.0163111
CM016664.1	15550000	474	0.781	40.8	0.01554
CM016664.1	15560000	386	0.64	38.7	0.0165934
CM016664.1	15570000	141	0.252	37.1	0.0189568
CM016664.1	15580000	55	0.072	39.3	0.0148398
CM016664.1	15590000	115	0.181	39.7	0.0199758
CM016664.1	15600000	227	0.38	39.3	0.0153007
CM016664.1	15610000	393	0.647	38.3	0.0143949
CM016664.1	15620000	413	0.72	38.6	0.0158224
CM016664.1	15630000	197	0.364	39.1	0.0159337
CM016664.1	15640000	17	0.028	33	0.0185429
CM016664.1	15650000	0	0	0	0
CM016664.1	15660000	129	0.188	37.5	0.0132058
CM016664.1	15670000	410	0.579	39.8	0.013275
CM016664.1	15680000	327	0.462	40.8	0.0129244
CM016664.1	15690000	60	0.092	38.8	0.0119231
CM016664.1	15700000	119	0.189	40.8	0.0215402
CM016664.1	15710000	297	0.464	42.4	0.0196871
CM016664.1	15720000	455	0.704	43.6	0.0133262
CM016664.1	15730000	424	0.659	42.8	0.0108952
CM016664.1	15740000	170	0.258	42.1	0.0122743
CM016664.1	15750000	105	0.06	98.5	0.0115402
CM016664.1	15760000	277	0.259	52	0.0161583
CM016664.1	15770000	450	0.54	43.1	0.0151784
CM016664.1	15780000	489	0.774	44.4	0.0137664
CM016664.1	15790000	373	0.794	43	0.0148583
CM016664.1	15800000	174	0.396	41.2	0.0159389
CM016664.1	15810000	263	0.503	42.1	0.0122028
CM016664.1	15820000	457	0.901	43.3	0.0118793
CM016664.1	15830000	399	0.824	42.9	0.0142329
CM016664.1	15840000	184	0.385	41.9	0.0173651
CM016664.1	15850000	194	0.379	40.8	0.0120447
CM016664.1	15860000	420	0.805	42.4	0.0126697
CM016664.1	15870000	421	0.778	42.9	0.0135266
CM016664.1	15880000	486	0.771	42.6	0.0136445
CM016664.1	15890000	581	0.898	43.6	0.014142
CM016664.1	15900000	534	0.883	43	0.0135877
CM016664.1	15910000	477	0.824	42.1	0.0123526
CM016664.1	15920000	326	0.571	41.4	0.01412
CM016664.1	15930000	272	0.436	42.1	0.0153205
CM016664.1	15940000	189	0.295	43.3	0.0144624
CM016664.1	15950000	276	0.335	40.3	0.0182802
CM016664.1	15960000	484	0.67	41	0.0172975
CM016664.1	15970000	433	0.717	42.7	0.015144
CM016664.1	15980000	524	0.778	42.4	0.0143065
CM016664.1	15990000	563	0.842	41.1	0.0142511
CM016664.1	16000000	489	0.809	41	0.0133679
CM016664.1	16010000	293	0.489	40.4	0.0123474
CM016664.1	16020000	79	0.157	37.4	0.0142648
CM016664.1	16030000	33	0.052	35.5	0.021137
CM016664.1	16040000	12	0.01	37.8	0.0183572
CM016664.1	16050000	230	0.331	37.5	0.0122878
CM016664.1	16060000	517	0.694	39.7	0.0140763
CM016664.1	16070000	533	0.704	42.2	0.0146312
CM016664.1	16080000	454	0.682	41.7	0.015354
CM016664.1	16090000	483	0.672	40.6	0.0167143
CM016664.1	16100000	552	0.72	40	0.0158797
CM016664.1	16110000	569	0.847	40.5	0.0164702
CM016664.1	16120000	481	0.775	41.4	0.0146664
CM016664.1	16130000	198	0.347	42.1	0.010771
CM016664.1	16140000	162	0.393	41.2	0.0157883
CM016664.1	16150000	272	0.68	39.6	0.0177267
CM016664.1	16160000	341	0.729	41	0.0157466
CM016664.1	16170000	387	0.664	42.1	0.0134906
CM016664.1	16180000	498	0.72	41.4	0.0138126
CM016664.1	16190000	560	0.87	41.8	0.01407
CM016664.1	16200000	472	0.755	41.6	0.0150639
CM016664.1	16210000	267	0.399	41.5	0.0155483
CM016664.1	16220000	147	0.073	55.4	0.00791163
CM016664.1	16230000	367	0.45	43.8	0.0151367
CM016664.1	16240000	470	0.695	41	0.0150242
CM016664.1	16250000	264	0.306	39.2	0.0139993
CM016664.1	16260000	190	0.207	37	0.0149391
CM016664.1	16270000	214	0.254	37.2	0.0152472
CM016664.1	16280000	394	0.484	41.3	0.0142089
CM016664.1	16290000	617	0.831	40.8	0.0146339
CM016664.1	16300000	550	0.879	41	0.0158543
CM016664.1	16310000	538	0.871	42	0.0153184
CM016664.1	16320000	531	0.878	42.8	0.0137915
CM016664.1	16330000	425	0.77	42.7	0.0136055
CM016664.1	16340000	247	0.452	40.8	0.0148939
CM016664.1	16350000	279	0.568	43.1	0.0169944
CM016664.1	16360000	288	0.617	42.7	0.0165513
CM016664.1	16370000	157	0.273	41	0.0141432
CM016664.1	16380000	137	0.125	57.4	0.0119813
CM016664.1	16390000	71	0.044	83	0.00705323
CM016664.1	16420000	0	0	0	0
CM016664.1	16430000	0	0	0	0
CM016664.1	16440000	0	0	0	0
CM016664.1	16450000	0	0.003	31.7	0
CM016664.1	16460000	17	0.015	32.3	0.00503245
CM016664.1	16470000	208	0.292	40	0.0132537
CM016664.1	16480000	305	0.525	40.4	0.0161446
CM016664.1	16490000	228	0.409	40.1	0.0164879
CM016664.1	16500000	114	0.163	39.6	0.0129717
CM016664.1	16510000	6	0.003	34.4	0.0603391
CM016664.1	16520000	83	0.185	40.2	0.012455
CM016664.1	16530000	301	0.577	40.7	0.0138066
CM016664.1	16540000	398	0.804	41.5	0.0143695
CM016664.1	16550000	360	0.77	41.1	0.0172623
CM016664.1	16560000	272	0.527	39.8	0.0182652
CM016664.1	16570000	264	0.489	40.6	0.0122801
CM016664.1	16580000	323	0.615	40.9	0.0132098
CM016664.1	16590000	163	0.325	41	0.0137403
CM016664.1	16600000	119	0.276	43.1	0.0125273
CM016664.1	16610000	314	0.689	41.9	0.0151431
CM016664.1	16620000	306	0.633	40.3	0.0156068
CM016664.1	16630000	157	0.311	38.5	0.0142258
CM016664.1	16640000	231	0.526	40.2	0.0128785
CM016664.1	16650000	325	0.844	40.6	0.0133206
CM016664.1	16660000	299	0.685	39.6	0.016258
CM016664.1	16670000	197	0.4	37.9	0.0175998
CM016664.1	16680000	73	0.179	39.6	0.0160421
CM016664.1	16690000	17	0.023	43.7	0.0180974
CM016664.1	16700000	59	0.06	46.9	0.0140239
CM016664.1	16710000	189	0.252	41.8	0.0167913
CM016664.1	16720000	377	0.548	40.1	0.0155113
CM016664.1	16730000	452	0.793	41.1	0.0142672
CM016664.1	16740000	421	0.871	42	0.0144567
CM016664.1	16750000	390	0.783	41.7	0.0141335
CM016664.1	16760000	365	0.746	40.9	0.0164681
CM016664.1	16770000	380	0.805	41	0.0169868
CM016664.1	16780000	342	0.801	41.5	0.0154837
CM016664.1	16790000	300	0.697	40.4	0.0149381
CM016664.1	16800000	259	0.448	38.4	0.0145539
CM016664.1	16810000	334	0.47	40.3	0.0165752
CM016664.1	16820000	433	0.712	41.6	0.0153612
CM016664.1	16830000	302	0.572	41.4	0.0139267
CM016664.1	16840000	215	0.241	57.7	0.0124893
CM016664.1	16850000	126	0.057	113.1	0.00997151
CM016664.1	16860000	263	0.366	41.4	0.0130021
CM016664.1	16870000	561	0.809	42.3	0.0140596
CM016664.1	16880000	360	0.536	42.4	0.014427
CM016664.1	16890000	132	0.246	41	0.0133187
CM016664.1	16900000	241	0.368	42.2	0.0177816
CM016664.1	16910000	431	0.575	41	0.0158943
CM016664.1	16920000	523	0.631	58.2	0.0126129
CM016664.1	16930000	374	0.33	76.6	0.0140436
CM016664.1	16940000	113	0.06	51	0.0208699
CM016664.1	16950000	110	0.211	40.8	0.010265
CM016664.1	16960000	289	0.586	40.3	0.0126193
CM016664.1	16970000	369	0.676	41.1	0.0160362
CM016664.1	16980000	418	0.67	43.1	0.0146796
CM016664.1	16990000	436	0.759	43	0.0120177
CM016664.1	17000000	440	0.776	43	0.0134922
CM016664.1	17010000	466	0.807	42.5	0.0142415
CM016664.1	17020000	459	0.705	42.2	0.0125462
CM016664.1	17030000	445	0.657	42.6	0.0130108
CM016664.1	17040000	375	0.57	41.7	0.0153483
CM016664.1	17050000	155	0.198	40.7	0.0175743
CM016664.1	17060000	85	0.04	45.6	0.0218793
CM016664.1	17070000	205	0.271	44.1	0.0140985
CM016664.1	17080000	161	0.379	40.6	0.0198346
CM016664.1	17090000	171	0.381	38.8	0.0207261
CM016664.1	17100000	289	0.536	41.2	0.012956
CM016664.1	17110000	360	0.693	41.1	0.0136701
CM016664.1	17120000	334	0.638	41.3	0.0160189
CM016664.1	17130000	133	0.249	41.8	0.0189024
CM016664.1	17140000	0	0	0	0
CM016664.1	17150000	185	0.319	44	0.0144014
CM016664.1	17160000	492	0.736	42.9	0.0137184
CM016664.1	17170000	484	0.713	42.6	0.0136023
CM016664.1	17180000	421	0.688	43.2	0.0139508
CM016664.1	17190000	311	0.534	42.5	0.0136756
CM016664.1	17200000	78	0.16	40.9	0.0125093
CM016664.1	17210000	11	0.017	37.8	0.00895528
CM016664.1	17220000	4	0.01	35.6	0.0321042
CM016664.1	17230000	28	0.034	39.9	0.0115934
CM016664.1	17240000	24	0.024	41.7	0.00853793
CM016664.1	17250000	2	0.005	30.5	0.00654203
CM016664.1	17260000	2	0.005	30.5	0.00654203
CM016664.1	17270000	0	0	0	0
CM016664.1	17280000	72	0.145	43.6	0.0158436
CM016664.1	17290000	362	0.604	43.4	0.0141215
CM016664.1	17300000	561	0.874	43.6	0.0157447
CM016664.1	17310000	530	0.858	43.6	0.0158402
CM016664.1	17320000	530	0.858	43.8	0.0143673
CM016664.1	17330000	481	0.824	43.4	0.0149748
CM016664.1	17340000	455	0.828	41.9	0.0145634
CM016664.1	17350000	526	0.886	41.9	0.0143131
CM016664.1	17360000	414	0.694	42.5	0.013944
CM016664.1	17370000	303	0.527	44	0.0134173
CM016664.1	17380000	192	0.341	44.7	0.0134089
CM016664.1	17390000	339	0.492	43.7	0.0126947
CM016664.1	17400000	513	0.8	44.9	0.0134866
CM016664.1	17410000	375	0.646	44.7	0.0154006
CM016664.1	17420000	441	0.761	43.2	0.0145098
CM016664.1	17430000	411	0.703	43.1	0.0132432
CM016664.1	17440000	284	0.448	40.7	0.0132707
CM016664.1	17450000	304	0.648	41.6	0.0136023
CM016664.1	17460000	355	0.86	41.9	0.0151456
CM016664.1	17470000	327	0.627	41.4	0.0154537
CM016664.1	17480000	292	0.605	41.8	0.015622
CM016664.1	17490000	309	0.695	39.7	0.0157837
CM016664.1	17500000	243	0.597	39.6	0.0138881
CM016664.1	17510000	212	0.731	41.6	0.0136889
CM016664.1	17520000	223	0.77	40.9	0.0139269
CM016664.1	17530000	198	0.667	40.4	0.0137221
CM016664.1	17540000	104	0.344	40.3	0.0127883
CM016664.1	17550000	124	0.341	39.6	0.01741
CM016664.1	17560000	261	0.735	39.8	0.0154441
CM016664.1	17570000	275	0.641	40.2	0.0160443
CM016664.1	17580000	195	0.391	43.3	0.0164901
CM016664.1	17590000	238	0.64	42.8	0.0131206
CM016664.1	17600000	300	0.657	41.6	0.0121084
CM016664.1	17610000	200	0.36	41.8	0.0114087
CM016664.1	17620000	115	0.226	56.4	0.0112782
CM016664.1	17630000	106	0.157	61.2	0.0137391
CM016664.1	17640000	287	0.516	40.9	0.015031
CM016664.1	17650000	273	0.6	41.8	0.0143975
CM016664.1	17660000	235	0.543	42.7	0.016903
CM016664.1	17670000	424	0.542	61.4	0.0156623
CM016664.1	17680000	432	0.681	58.2	0.0115785
CM016664.1	17690000	321	0.921	43	0.0136636
CM016664.1	17700000	301	0.883	41.7	0.0179244
CM016664.1	17710000	375	0.925	41.2	0.0179223
CM016664.1	17720000	347	0.792	40.6	0.0163669
CM016664.1	17730000	338	0.728	39.8	0.0156774
CM016664.1	17740000	251	0.569	40.2	0.0153579
CM016664.1	17750000	232	0.602	41.2	0.0175951
CM016664.1	17760000	266	0.519	43	0.0206311
CM016664.1	17770000	543	0.22	58.3	0.0175362
CM016664.1	17780000	486	0.19	55.7	0.0152256
CM016664.1	17790000	29	0.04	36.2	0.0100533
CM016664.1	17800000	0	0	0	0
CM016664.1	17810000	125	0.133	44.7	0.0100819
CM016664.1	17820000	373	0.393	46.9	0.0130758
CM016664.1	17830000	334	0.439	44.7	0.0153146
CM016664.1	17840000	89	0.19	39.5	0.0159045
CM016664.1	17850000	89	0.076	36.6	0.0145882
CM016664.1	17860000	270	0.489	39.9	0.0156806
CM016664.1	17870000	401	0.845	40.2	0.0157309
CM016664.1	17880000	473	0.793	39.8	0.0159727
CM016664.1	17890000	478	0.796	39.2	0.0151133
CM016664.1	17900000	458	0.89	40.3	0.0141576
CM016664.1	17910000	507	0.852	39.7	0.0137413
CM016664.1	17920000	458	0.69	39	0.0144648
CM016664.1	17930000	412	0.756	41.1	0.0177107
CM016664.1	17940000	409	0.828	40.9	0.0165733
CM016664.1	17950000	361	0.759	40.4	0.0154232
CM016664.1	17960000	319	0.776	40.3	0.0169951
CM016664.1	17970000	273	0.558	39.5	0.0195054
CM016664.1	17980000	159	0.219	36.7	0.0211749
CM016664.1	17990000	133	0.293	41.3	0.0182999
CM016664.1	18000000	243	0.486	42	0.0156822
CM016664.1	18010000	188	0.367	39.9	0.0114377
CM016664.1	18020000	83	0.192	39.6	0.00854039
CM016664.1	18030000	74	0.223	44.3	0.00994549
CM016664.1	18040000	214	0.488	41.8	0.0160321
CM016664.1	18050000	396	0.678	40.4	0.0146949
CM016664.1	18060000	415	0.595	40.1	0.0128921
CM016664.1	18070000	192	0.255	40.1	0.0133436
CM016664.1	18080000	90	0.117	41.1	0.0203222
CM016664.1	18090000	314	0.548	40.7	0.0155164
CM016664.1	18100000	410	0.793	40.8	0.0150698
CM016664.1	18110000	372	0.731	41.9	0.0162336
CM016664.1	18120000	388	0.816	42.5	0.0180362
CM016664.1	18130000	435	0.883	40.9	0.0172421
CM016664.1	18140000	416	0.85	40.4	0.0150703
CM016664.1	18150000	374	0.843	41.9	0.0156139
CM016664.1	18160000	379	0.851	40.9	0.0153962
CM016664.1	18170000	296	0.612	39.6	0.0135569
CM016664.1	18180000	199	0.386	40	0.0108634
CM016664.1	18190000	288	0.555	39.8	0.013224
CM016664.1	18200000	355	0.609	38.6	0.0157485
CM016664.1	18210000	387	0.639	38.4	0.0136918
CM016664.1	18220000	479	0.786	40	0.0149077
CM016664.1	18230000	501	0.816	40.5	0.016381
CM016664.1	18240000	496	0.794	39.5	0.0141661
CM016664.1	18250000	406	0.812	39.9	0.0141952
CM016664.1	18260000	341	0.898	42.1	0.0152935
CM016664.1	18270000	344	0.906	42.5	0.0131371
CM016664.1	18280000	403	0.74	40.7	0.0126498
CM016664.1	18290000	469	0.617	40.3	0.0144257
CM016664.1	18300000	340	0.496	40.8	0.0154129
CM016664.1	18310000	291	0.519	40.1	0.0159475
CM016664.1	18320000	263	0.693	39.4	0.0151897
CM016664.1	18330000	345	0.824	41.5	0.0127256
CM016664.1	18340000	491	0.867	42.7	0.0127602
CM016664.1	18350000	467	0.777	41.7	0.0136912
CM016664.1	18360000	559	0.824	41.8	0.014963
CM016664.1	18370000	506	0.705	41.2	0.0155771
CM016664.1	18380000	450	0.618	41.3	0.0156333
CM016664.1	18390000	264	0.35	42.1	0.0161328
CM016664.1	18400000	51	0.133	42.1	0.0120955
CM016664.1	18410000	168	0.541	41.1	0.0118625
CM016664.1	18420000	263	0.865	41.4	0.0146072
CM016664.1	18430000	277	0.709	40.7	0.0151394
CM016664.1	18440000	174	0.37	39.6	0.0126233
CM016664.1	18450000	127	0.353	41.7	0.0117674
CM016664.1	18460000	205	0.535	41.3	0.0148101
CM016664.1	18470000	263	0.682	41.3	0.0174929
CM016664.1	18480000	144	0.384	41.5	0.0188184
CM016664.1	18490000	153	0.421	42.5	0.0135335
CM016664.1	18500000	339	0.733	41.1	0.0134171
CM016664.1	18510000	340	0.584	39	0.0138521
CM016664.1	18520000	223	0.363	37.7	0.0142158
CM016664.1	18530000	312	0.553	42.6	0.0141118
CM016664.1	18540000	503	0.867	43.2	0.014026
CM016664.1	18550000	418	0.657	41.6	0.0146735
CM016664.1	18560000	371	0.573	41.5	0.015378
CM016664.1	18570000	410	0.74	42.5	0.014745
CM016664.1	18580000	209	0.438	42.8	0.0144034
CM016664.1	18590000	128	0.188	40.2	0.0186303
CM016664.1	18600000	363	0.556	40.1	0.0208505
CM016664.1	18610000	497	0.73	40	0.0176009
CM016664.1	18620000	435	0.526	40.7	0.0139211
CM016664.1	18630000	322	0.397	40.5	0.0141933
CM016664.1	18640000	274	0.49	40.2	0.0192109
CM016664.1	18650000	293	0.496	40.5	0.0191478
CM016664.1	18660000	407	0.657	41.8	0.0136677
CM016664.1	18670000	431	0.743	42.2	0.0154526
CM016664.1	18680000	420	0.765	42.4	0.0179542
CM016664.1	18690000	481	0.863	42.9	0.0152944
CM016664.1	18700000	475	0.648	44.2	0.0143742
CM016664.1	18710000	449	0.452	45.8	0.0145598
CM016664.1	18720000	438	0.502	42.9	0.0177757
CM016664.1	18730000	229	0.326	41.6	0.0211931
CM016664.1	18740000	163	0.134	92.9	0.00705147
CM016664.1	18750000	166	0.131	93.4	0.044246
CM016664.1	18760000	62	0.069	40.1	0.0587045
CM016664.1	18770000	289	0.414	45.9	0.0127184
CM016664.1	18780000	315	0.516	44.7	0.0143647
CM016664.1	18790000	81	0.146	41	0.019458
CM016664.1	18800000	3	0.007	33	0.0341455
CM016664.1	18810000	135	0.204	43.3	0.0139061
CM016664.1	18820000	192	0.319	42.3	0.0134165
CM016664.1	18830000	60	0.122	39.9	0.0134459
CM016664.1	18840000	24	0.048	35.6	0.00887814
CM016664.1	18850000	24	0.048	35.7	0.00887814
CM016664.1	18860000	3	0.011	33.5	0.00665238
CM016664.1	18870000	3	0.011	33.5	0.00665238
CM016664.1	18880000	141	0.2	42	0.0125842
CM016664.1	18890000	312	0.619	42.8	0.0122713
CM016664.1	18900000	339	0.77	42.3	0.014699
CM016664.1	18910000	226	0.511	41.3	0.0161872
CM016664.1	18920000	210	0.432	39.3	0.0166173
CM016664.1	18930000	365	0.722	40.1	0.0146443
CM016664.1	18940000	605	0.771	54.6	0.0098712
CM016664.1	18950000	682	0.559	68.8	0.00867148
CM016664.1	18960000	464	0.519	51.2	0.0116277
CM016664.1	18970000	195	0.293	41.2	0.0152004
CM016664.1	18980000	151	0.232	41.4	0.0117329
CM016664.1	18990000	164	0.293	41.1	0.0142682
CM016664.1	19000000	34	0.073	39.4	0.0252285
CM016664.1	19010000	0	0	0	0
CM016664.1	19020000	115	0.279	41.6	0.0128377
CM016664.1	19030000	183	0.447	40.8	0.0122468
CM016664.1	19040000	252	0.575	40.6	0.0125932
CM016664.1	19050000	212	0.49	41.2	0.0127614
CM016664.1	19060000	29	0.089	41.3	0.0103092
CM016664.1	19070000	1	0.006	31	0.00907943
CM016664.1	19080000	144	0.337	38.6	0.0155651
CM016664.1	19090000	350	0.703	40.1	0.0177426
CM016664.1	19100000	363	0.711	39.7	0.0183008
CM016664.1	19110000	354	0.731	39.2	0.016194
CM016664.1	19120000	340	0.721	40	0.0151553
CM016664.1	19130000	319	0.608	41.8	0.0143841
CM016664.1	19140000	329	0.601	45.1	0.0147675
CM016664.1	19150000	295	0.653	42.7	0.0132011
CM016664.1	19160000	167	0.388	39.9	0.0135547
CM016664.1	19170000	138	0.282	38.3	0.016401
CM016664.1	19180000	253	0.567	40.8	0.013864
CM016664.1	19190000	378	0.807	42.3	0.0132672
CM016664.1	19200000	678	0.914	47.4	0.0133648
CM016664.1	19210000	669	0.799	49.5	0.0133589
CM016664.1	19220000	411	0.65	43.1	0.0135008
CM016664.1	19230000	315	0.645	42.1	0.0130742
CM016664.1	19240000	156	0.387	43.1	0.0122789
CM016664.1	19250000	153	0.453	39.2	0.0150812
CM016664.1	19260000	281	0.847	40.7	0.0155116
CM016664.1	19270000	243	0.739	42.3	0.0156033
CM016664.1	19280000	97	0.323	41.7	0.0173507
CM016664.1	19290000	5	0.024	34.8	0.0211387
CM016664.1	19300000	0	0	0	0
CM016664.1	19310000	93	0.346	39	0.0147313
CM016664.1	19320000	179	0.82	40.1	0.0183641
CM016664.1	19330000	165	0.968	41.6	0.0173503
CM016664.1	19340000	234	0.864	40.8	0.0139088
CM016664.1	19350000	341	0.647	39.3	0.014869
CM016664.1	19360000	333	0.489	39.6	0.0150781
CM016664.1	19370000	152	0.218	38.8	0.0141533
CM016664.1	19380000	87	0.056	46.4	0.0139985
CM016664.1	19390000	289	0.274	50	0.0117432
CM016664.1	19400000	315	0.452	44.6	0.0128696
CM016664.1	19410000	153	0.291	37.8	0.0168872
CM016664.1	19420000	86	0.084	34.1	0.0186174
CM016664.1	19430000	41	0.031	33.4	0.0162903
CM016664.1	19440000	25	0.107	42.2	0.00998922
CM016664.1	19450000	114	0.269	39.6	0.0137245
CM016664.1	19460000	89	0.17	37.6	0.0146453
CM016664.1	19470000	160	0.427	42.1	0.0156152
CM016664.1	19480000	375	0.841	41.3	0.0181692
CM016664.1	19490000	369	0.824	41.4	0.0166917
CM016664.1	19500000	334	0.816	43.5	0.0126852
CM016664.1	19510000	364	0.827	43.1	0.0125437
CM016664.1	19520000	375	0.853	42.6	0.0165676
CM016664.1	19530000	339	0.851	42.7	0.0171577
CM016664.1	19540000	291	0.781	41.9	0.0122429
CM016664.1	19550000	243	0.557	41.3	0.0153098
CM016664.1	19560000	130	0.248	39	0.0237668
CM016664.1	19570000	169	0.327	41.3	0.0176013
CM016664.1	19580000	290	0.465	42.2	0.0154164
CM016664.1	19590000	335	0.617	40.9	0.0136988
CM016664.1	19600000	394	0.856	40.1	0.0152542
CM016664.1	19610000	400	0.892	40.2	0.0182013
CM016664.1	19620000	326	0.865	41	0.0161924
CM016664.1	19630000	381	0.815	41.1	0.0126885
CM016664.1	19640000	370	0.65	40.2	0.014612
CM016664.1	19650000	371	0.633	41	0.0127441
CM016664.1	19660000	418	0.704	41.3	0.0152139
CM016664.1	19670000	250	0.45	39.6	0.0208837
CM016664.1	19680000	282	0.519	40.5	0.0141659
CM016664.1	19690000	373	0.844	40.8	0.0131664
CM016664.1	19700000	256	0.842	39.7	0.0153708
CM016664.1	19710000	228	0.78	40.4	0.0162214
CM016664.1	19720000	330	0.829	42.2	0.0139483
CM016664.1	19730000	267	0.585	42.7	0.0149219
CM016664.1	19740000	192	0.374	41.1	0.0148899
CM016664.1	19750000	344	0.638	39.5	0.0143328
CM016664.1	19760000	376	0.665	39.1	0.0147938
CM016664.1	19770000	304	0.607	39.6	0.016561
CM016664.1	19780000	360	0.856	41.4	0.0166066
CM016664.1	19790000	401	0.824	41.6	0.0189081
CM016664.1	19800000	333	0.566	40.5	0.0185135
CM016664.1	19810000	372	0.646	42.7	0.0140303
CM016664.1	19820000	499	0.88	43.8	0.0152388
CM016664.1	19830000	561	0.897	42.8	0.018129
CM016664.1	19840000	549	0.917	43.6	0.0168731
CM016664.1	19850000	360	0.613	44.5	0.0155076
CM016664.1	19860000	167	0.246	42.4	0.0248983
CM016664.1	19870000	74	0.134	42.1	0.027049
CM016664.1	19880000	23	0.022	39.5	0.0104122
CM016664.1	19890000	19	0.017	46.3	0.0195813
CM016664.1	19900000	19	0.02	40.2	0.0254288
CM016664.1	19910000	132	0.381	40.8	0.0215083
CM016664.1	19920000	355	0.85	41.8	0.0169311
CM016664.1	19930000	271	0.577	42.1	0.0143983
CM016664.1	19940000	128	0.128	45.3	0.0120305
CM016664.1	19950000	117	0.068	45.4	0.011857
CM016664.1	19960000	38	0.048	34	0.0134379
CM016664.1	19970000	112	0.265	39.3	0.0107922
CM016664.1	19980000	227	0.613	40.4	0.0120391
CM016664.1	19990000	250	0.802	41.9	0.0154768
CM016664.1	20000000	256	0.752	41.3	0.0145314
[truncated: 44,472 more rows]
