# Supplementary material for: A large genomic insertion containing a duplicated follistatin gene is linked to the pea aphid male wing dimorphism
Source: eLife. 2020 Mar 6;9:e50608. doi: 10.7554/eLife.50608 (PMC7060042; doi:10.7554/eLife.50608)
Supplement: Source data 3. [file elife-50608-data3.xlsx]

## Sheet: Sheet1
Source data 3 - Data from RT-qPCR analysis
as1=ACYPI25525			Replicate	Gene	Morph	Stage	delta_Ct	neg_delta_delta_Cts			Gene	Stage	t	df	p
sam50=ACYPI02281											ACYPI02281	Embryo	-1.0906	7.8914	0.3076
frs2=ACYPI25532			1	ACYPI02281	Winged	Embryo	5.86069	0.603207			ACYPI02281	First instar	0.38239	7.9452	0.7122
cdg=ACYPI25533											ACYPI25525	Embryo	3.2877	7.1846	0.01286
			1	ACYPI02281	Unwinged	Embryo	6.18697	0.276926			ACYPI25525	First instar	0.90861	7.8025	0.3908
											ACYPI25532	Embryo	0.35134	7.0711	0.7356
			1	ACYPI02281	Winged	First	7.17855	-0.714654			ACYPI25532	First instar	1.4316	6.5913	0.1979
											ACYPI25533	Embryo	-0.82636	6.6687	0.4372
			1	ACYPI02281	Unwinged	First	6.44771	0.016192			ACYPI25533	First instar	2.1675	7.9915	0.0621
			2	ACYPI02281	Winged	Embryo	6.96709	-0.503188
			2	ACYPI02281	Unwinged	Embryo	7.66731	-1.20341
			2	ACYPI02281	Winged	First	6.91296	-0.449057
			2	ACYPI02281	Unwinged	First	7.00976	-0.545864
			3	ACYPI02281	Winged	Embryo	7.05254	-0.588635
			3	ACYPI02281	Unwinged	Embryo	6.41215	0.0517531
			3	ACYPI02281	Winged	First	6.40998	0.0539234
			3	ACYPI02281	Unwinged	First	7.07934	-0.615442
			4	ACYPI02281	Winged	Embryo	7.3825	-0.918598
			4	ACYPI02281	Unwinged	Embryo	6.01816	0.44574
			4	ACYPI02281	Winged	First	6.50946	-0.0455582
			4	ACYPI02281	Unwinged	First	7.17849	-0.714593
			5	ACYPI02281	Winged	Embryo	7.31158	-0.847676
			5	ACYPI02281	Unwinged	Embryo	6.03515	0.428754
			5	ACYPI02281	Winged	First	4.89992	1.56398
			5	ACYPI02281	Unwinged	First	5.22338	1.24052
			1	ACYPI25525	Winged	Embryo	10.0274	0.786338
			1	ACYPI25525	Unwinged	Embryo	10.6031	0.210551
			1	ACYPI25525	Winged	First	10.6453	0.168393
			1	ACYPI25525	Unwinged	First	10.5332	0.280481
			2	ACYPI25525	Winged	Embryo	10.3191	0.494594
			2	ACYPI25525	Unwinged	Embryo	11.0554	-0.241744
			2	ACYPI25525	Winged	First	11.59	-0.776293
			2	ACYPI25525	Unwinged	First	8.45872	2.35498
			3	ACYPI25525	Winged	Embryo	9.32913	1.48457
			3	ACYPI25525	Unwinged	Embryo	11.6442	-0.830463
			3	ACYPI25525	Winged	First	9.53651	1.27719
			3	ACYPI25525	Unwinged	First	11.8758	-1.06205
			4	ACYPI25525	Winged	Embryo	9.52926	1.28444
			4	ACYPI25525	Unwinged	Embryo	10.1807	0.633014
			4	ACYPI25525	Winged	First	8.99606	1.81764
			4	ACYPI25525	Unwinged	First	11.1979	-0.384193
			5	ACYPI25525	Winged	Embryo	9.84599	0.967713
			5	ACYPI25525	Unwinged	Embryo	10.5849	0.228802
			5	ACYPI25525	Winged	First	9.0395	1.7742
			5	ACYPI25525	Unwinged	First	11.2737	-0.459954
			1	ACYPI25532	Winged	Embryo	7.18555	0.198954
			1	ACYPI25532	Unwinged	Embryo	6.45364	0.930861
			1	ACYPI25532	Winged	First	9.57593	-2.19143
			1	ACYPI25532	Unwinged	First	10.4936	-3.10908
			2	ACYPI25532	Winged	Embryo	6.6335	0.751005
			2	ACYPI25532	Unwinged	Embryo	8.59533	-1.21083
			2	ACYPI25532	Winged	First	10.0735	-2.68896
			2	ACYPI25532	Unwinged	First	10.1857	-2.80115
			3	ACYPI25532	Winged	Embryo	7.4568	-0.0722981
			3	ACYPI25532	Unwinged	Embryo	7.00356	0.38094
			3	ACYPI25532	Winged	First	10.6841	-3.29957
			3	ACYPI25532	Unwinged	First	12.4255	-5.04098
			4	ACYPI25532	Winged	Embryo	8.14638	-0.76188
			4	ACYPI25532	Unwinged	Embryo	6.73014	0.654364
			4	ACYPI25532	Winged	First	11.4913	-4.10685
			4	ACYPI25532	Unwinged	First	12.7537	-5.36921
			5	ACYPI25532	Winged	Embryo	6.61306	0.771436
			5	ACYPI25532	Unwinged	Embryo	8.14002	-0.755523
			5	ACYPI25532	Winged	First	10.3448	-2.96026
			5	ACYPI25532	Unwinged	First	10.7362	-3.35166
			1	ACYPI25533	Winged	Embryo	3.78802	-0.549416
			1	ACYPI25533	Unwinged	Embryo	3.11251	0.12609
			1	ACYPI25533	Winged	First	4.50563	-1.26703
			1	ACYPI25533	Unwinged	First	6.49199	-3.25339
			2	ACYPI25533	Winged	Embryo	3.61418	-0.375579
			2	ACYPI25533	Unwinged	Embryo	3.72822	-0.489616
			2	ACYPI25533	Winged	First	3.84841	-0.609815
			2	ACYPI25533	Unwinged	First	5.78666	-2.54806
			3	ACYPI25533	Winged	Embryo	3.82106	-0.582458
			3	ACYPI25533	Unwinged	Embryo	3.07922	0.159383
			3	ACYPI25533	Winged	First	5.29111	-2.05251
			3	ACYPI25533	Unwinged	First	8.07941	-4.84081
			4	ACYPI25533	Winged	Embryo	3.25091	-0.0123113
			4	ACYPI25533	Unwinged	Embryo	3.02886	0.209743
			4	ACYPI25533	Winged	First	6.96273	-3.72413
			4	ACYPI25533	Unwinged	First	7.98079	-4.74219
			5	ACYPI25533	Winged	Embryo	2.72048	0.518117
			5	ACYPI25533	Unwinged	Embryo	3.2443	-0.00569591
			5	ACYPI25533	Winged	First	5.14467	-1.90607
			5	ACYPI25533	Unwinged	First	5.52241	-2.28381
