# Supplementary material for: A large genomic insertion containing a duplicated follistatin gene is linked to the pea aphid male wing dimorphism
Source: eLife. 2020 Mar 6;9:e50608. doi: 10.7554/eLife.50608 (PMC7060042; doi:10.7554/eLife.50608)
Supplement: Source data 4. [file elife-50608-data4.xlsx]

## Sheet: Sheet1
Source data 4: Alignment of different biotype individuals outside of the api region.
>Mes1
TCACCTCCGTGAGCTTATTATAACGAGAATGCTGTACAATTTGTACGTAAAAGGTACCAAAATAAATTCAGTTAATTGATTTGGTATTATATTTAGATAAAATATAACCAACGCATCGAAATAAACGCTCGTAGTTCTAAATATTTTAAACTGTGTTGTAATACACAATAACTTTGATGTTGATTGAATATTAATGAGGACTGTAAACTGTATAACAAGAGGCGGGAATAATATTCCAAGAAATGAGTTTTGGGTTAGGTATTTGATAGTAATATTAAGTATATCGAGTTTGTGTAGCTTTTCCACWGTTACATCAATTATTTAAATTATTCCCAAATAGTGAAAATCAATTATTTTCTACGACATACAACAWATCGAAACGTAAACAAAAATAAGAAG…
>Mes2
TCACCTCCGTGAGCTTATTATAACGAGAATGCTGTACAATTTGTACGTAAAAGGTACCAAAATAAATTCAGTTAATTGATTTGGTATTATATTTAGATAAAATATAACCAACGCATCGAAATAAACGCTCGTAGTTCTAAATATTTTAAACTGTGTTGTAATACACAATAACTTTGATGTTGATTGAATATTAATGAGGACTGTAAACTGTATAACAAGAGGCGGGAATAATATTCCAAGAAATGAGTTTTGGGTTAGGTATTTGATAGTAATATTAAGTATATCGAGTTTGTGTAGCTTTTCCACTGTTACATCAATTATTTAAATTATTCCCAAATAGTGAAAATCAATTATTTTCTACGACATACAACAAATCGAAACGTAAACAAAAATAAGAAG…
>Mes3
TCACCTCCGTGAGCTTATTATAACGAGAATKCTGTACAATTTGTACGTAAAAGGTACCAAAATAAATTCAGTTAATTGATTTGGTATTATATTTAGATAAAATATAACCAACGCATCGAAATAAACGCTCGTAGTTCTAAATATTTTAAACTGTGTTGTAATACACAATAACTTTGATGTTGATTGAATATTAATGAGGACTGTAAACTGTATAACAASAGGCGGGAATAATATTCCAAGAAATGARTTTTGGGTTAGGTATTTGATAGTAATATTAAGTATATCGAGTTTGTGTAGCTTTTCCACWGTTACATCAATTATTTAAATTATTCCCAAATAGTGAAAATCAATTATTTTCTACGACATACAACAAATCGAAACGTAAACAAAAATAAGAAG…
>Mes4
TCACCTCCGTGAGCTTATTATAACGAGAATKCTGTACAATTTGTACGTAAAAGGTACCAAAATAAATTCAGTTAATTGATTTGGTATTATATTTAGATAAAATATAACCAACGCATCGAAATAAACGCTCGTAGTTCTAAATATTTTAAACTGTGTTGTAATACACAATAACTTTGATGTTGATTGAATATTAATGAGGACTGTAAACTGTATAACAASAGGCGGGAATAATATTCCAAGAAATGAGTTTTGGGTTAGGTATTTGATAGTAATATTAAGTATATCGAGTTTGTGTAGCTTTTCCACAGTTACATCAATTATTTAAATTATTCCCAAATAGTGAAAATCAATTATTTTCTACGACATACAACATATCGAAACGTAAACAAAAATAAGAAG…
>Tp1
TCACCTCCGTGAGCTTATTATAACGAGAATGCTGTACAATTTGTACGTAAAAGGTACCAAAATAAATTCAGTTAATTGATTTGGTATTATATTTAGATAAAATATAACCAACGCATCGAAATAAACGCTCGTAGTTCTAAATATTTTAAACYGTGTTGTAATACACAATAACTTTGATGTTGATTGAATATTAATGAGGACTGTAAACTGTATAACAAGAGGCGGGAATAATATTCCAAGAAATGAGTTTTGGGTTAGGTATTTGATAGTAATATTAAGTATATCGAGTTTGTGTAGCTTTTCCACAGTTACATCAATTATTTAAATTATTCCCAAATAGTGAAAATCAATTATTTTCTACGACATACAACATATCGAAACGTAAACAAAAATAAGAAG…
>Tp2
TCACCTCCGTGAGCTTATTATAACGAGAATKCTGTACAATTTGTACGTAAAAGGTACCAAAATAAATTCAGTTAATTGATTTGGTATTATATTTAGATAAAATATAACCAACGCATCGAAATAAACGCTCGTAGTTCTAAATATTTTAAACTGTGTTGTAATACACAATAACTTTGATGTTGATTGAATATTAATGAGGACTGTAAACTGTATAACAASAGGCGGGAATAATATTCCAAGAAATGAGTTTTGGSTTAGGTATTTGATAGTAATATTAAGTATATCGAGTTTGTGTAGCTTTTCCACMGTTACATCAATTATTTAAATTATTCCCAAATAGTGAAAATCAATTATTTTCTACGACATACAACATATCGAAACGTAAACAAAAATAAGAAG…
>Lap1
TCACCTCCGTGAGCTTATTATAACGAGAATGCTGTACAATTTGTACGTAAAAGGTACCAAAATAAATTCAGTTAATTGATTTGGTATTATATTTAGATAAAACATAACCAACGCATCGAAATAAACGCTCGTAGTTCTAAATATTTTAAACTGTGTTGTAATACACAATAACTTTGATGTTGATTGAATATTAATGAGGACTGTAAACTGTATAACAAGAGGCGGGAATAATATTCCAAGAAATGAGTTTTGGGTTAGGTATTTAATAATAATATTAAGTATATCGAGTTTGTGTAGCTTTTCCACAGTTACATCAATTATTTAAATTATTCTCAAATAGTGAAAATCAATTATTTTCTACGACATACAACATATCGAAACGTAAACAAAAATAAGAAG…
>Lap2
TCACCTCCGTGAGCTTATTATAACGAGAATGCTGTACAATTTGTACGTAAAAGGTACCAAAATAAATTCAGTTAATTGATTTGGTATTATATTTAGATAAAACATAACCAACGCATCGAAATAAACGCTCGTAGTTCTAAATATTTTAAACTGTGTTGTAATACACAATAACTTTGATGTTGATTGAATATTAATGAGGACTGTAAACTGTATAACAAGAGGCGGGAATAATATTCCAAGAAATGAGTTTTGGGTTAGGTATTTAATAATAATATTAAGTATATCGAGTTTGTRTAGCTTTTCCACAGTTACATCAATTATTTAAATTATTCTCAAATAGTGAAAATCAATTATTTTCTACGACATACAACATATCGAAACGTAAACAAAAATAAGAAG…
>Lap3
TCACCTCCGTGAGCTTATTATAACGAGAATGCTGTACAATTTGTACGTAAAAGGTACCAAAATAAATTCAGTTAATTGATTTGGTATTATATTTAGATAAAACATAACCAACGCATCGAAATAAACGCTCGTAGTTCTAAATATTTTAAACTGTGTTGTAATACACAATAACTTTGATGTTGATTGAATATTAATGAGGACTGTAAACTGTATAACAAGAGGCGGGAATAATATTCCAAGAAATGAGTTTTGGGTTAGGTATTTAATAATAATATTAAGTATATCGAGTTTGTRTAGCTTTTCCACAGTTACATCAATTATTTAAATTATTCTCAAATAGTGAAAATCAATTATTTTCTACGACATACAACATATCGAAACGTAAACAAAAATAAGAAG…
>Ps1
TCACCTCCGTGAGCTTATTATAACGAGAATKCTGTACAATTTGTACGTAAAAGGTACCAAAATAAATTCAGTTAATTGATTTGGTATTATATTTAGATAAAATATAACCAACGCATCGAAATAAACGCTCGTAGTTCTAAATATTTTAARCTGTGTTGTAATACACAATAACTTTGATGTTGATTGAATATTAATGAGGWYTGTAAACTGTATAACAACAGGCGGGAATAATATTCCAAGAAATGAGTTTTGGGTTAGGTATTTGATAGTAATATTAAGTWTATCGARTTTGTGTAGCTTTTCCACAGTTACATCAATTATTTAAATTATTCCCAAATAGTGAAAATCAATTATTTTCTACGACATACAACATATCGAAACGTAAACAAAAATWAGAAG…
>Ps2
TCACCTCCGTGAGCTTATTATAACGAGAATKCTGTACAATTTGTACGTAAAAGGTACCAAAATAAATTCAGTTRATTGATTTGGTATTATATTTAGATAAAATATAACCAACGCATCGAAATAAACGCTCGTAGTTCTAAATATTTTAARCTGTGTTGTAATACACAATAACTTTGATGTTGATTGAATATTAATGAGGWYTGTAAACTGTATAACAACAGGCGGGAATAATATTCCAAGAAATGAGTTTTGGGTTAGGTATTTGATAGTAATATTAAGTATATCGAGTTTGTGTRGCTTTTCCACAGTTACATCAATTATTTAAATTATTCCCAAATAGTGAAAATCAATTATTTTCTACGACATACAACATATCGAAACGTAAACAAAAATWAGAAG…
>Ps3
TCACCTCCGTGAGCTTATTATAACGAGAATKCTGTACAATTTGTACGTAAAAGGTACCAAAATAAATTCAGTTAATTGATTTGGTATTATATTTAGATAAAATATAACCAACGCATCGAAATAAACGCTCGTAGTTCTAAATATTTTAARCTGTGTTGTAATACACAATAACTTTGATGTTGATTGAATATTAATGAGGWYTGTAAACTGTATAACAACAGGCGGGAATAATATTCCAAGAAATGAGTTTTGGGTTAGGTATTTGATAGTAATATTAAGTWTATCGARTTTGTGTAGCTTTTCCACAGTTACATCAATTATTTAAATTATTCCCAAATAGTGAAAATCAATTATTTTCTACGACATACAACATATCGAAACGTAAACAAAAATWAGAAG…
>Ps4
TCACCTCCGTGAGCTTATTATAACGAGAATGCTGTACAATTTGTACGTAAAAGGTACCAAAATAAATTCAGTTGATTGATTTGGTATTATATTTAGATAAAATATAACCAACGCATCGAAATAAACGCTCGTAGTTCTAAATATTTTAAACTGTGTTGTAATACACAATAACTTTGATGTTGATTGAATATTAATGAGGACTGTAAACTGTATAACAACAGGCGGGAATAATATTCCAAGAAATGAGTTTTGGGTTAGGTATTTGATAGTAATATTAAGTATATCGAGTTTGTGTGGCTTTTCCACAGTTACATCAATTATTTAAATTATTCCCAAATAGTGAAAATCAATTATTTTCTACGACATACAACATATCGAAACGTAAACAAAAATAAGAAG…
>Ps5
TCACCTCCGTGAGCTTATTATAACGAGAATTCTGTACAATTTGTACGTAAAAGGTACCAAAATAAATTCAGTTAATTGATTTGGTATTATATTTAGATAAAATATAACCAACGCATCGAAATAAACGCTCGTAGTTCTAAATATTTTAAGCTGTGTTGTAATACACAATAACTTTGATGTTGATTGAATATTAATGAGGTTTGTAAACTGTATAACAACAGGCGGGAATAATATTCCAAGAAATGAGTTTTGGGTTAGGTATTTGATAGTAATATTAAGTATATCGAGTTTGTGTAGCTTTTCCACAGTTACATCAATTATTTAAATTATTCCCAAATAGTGAAAATCAATTATTTTCTACGACATACAACATATCGAAACGTAAACAAAAATTAGAAG…
>Os
TCACCTCCGTGAGCTTATTATAACGAGAATTCTGTACAATTTGTACGTAAAAGGTACCAAAATAAATTCAGTTAATTGATTTGGTATTATATTTAGATAAAATATAACCAACGCATCGAAATAAACGCTCGTAGTTCTAAATATTTTAAACTGTGTTGTAATACACAATAACTTTGATGTTGATTGAATATTAATGAGGACTGTAAACTGTATAACAACAGGCGGGAATAATATTCCAAGAAATGAGTTTTGGGTTAGGTATTTGATAGTAATATTAAGTATATCGAGTTTGTGTAGCTTTTCCACAGTTACATCAATTATTTAAATTATTCCCAAATAGTGAAAATCAATTATTTTCTACGACATACAACATATCGAAACGTAAACAAAAATTAGAAG…
>Cs
TCACCTCCGTGAGCTTATTATAACGAGAATTCTGTACAATTTGTACGTAAAAGGTACCAAAATAAATTCAGTTAATTGATTTGGTATTATATTTAGATAAAATATAACCAACGCATCGAAATAAACGCTCGTAGTTCTAAATATTTTAAGCTGTGTTGTAATACACAATAACTTTGATGTTGATTGAATATTAATGAGGTTTGTAAACTGTATAACAACAGGCGGGAATAATATTCCAAGAAATGAGTTTTGGGTTAGGTATTTGATAGTAATATTAAGTATATCGAGTTTGTGTAGCTTTTCCACAGTTACATCAATTATTTAAATTATTCCCAAATAGTGAAAATCAATTATTTTCTACGACATACAACATATCGAAACGTAAACAAAAATTAGAAG…
>Vc1
TCACCTCCGTGAGCTTATTATAACGAGAATGCTGTACAATTTGTACGTAAAAGGTACCAAAATAAATTCAGTTAGTTGATTTGGTATTATATTTAGATAAAATATAACCAACGCATCGAAATAAACGCTCGTAGTTCTAAATATTTTAAACTGTGTTGTAATACACAATAACTTTGATGTTGATTGAATATTAATGAGGACTGTAAACTGTATAACAAGAGGCGGGAATAATATTCCAAGAAATGAGTTTTGGGTTAGGTATTTGATAGTAATATTAAGTATATCGAGTTTGTGTAGCTTTTCCACAGTTACATCAATTATTTAGATTATTCCCAAATAGTGAAAATCAATTATTTTCTACGACATACAACATATCGAAACGTAAACAAAAATAAGAAG…
>Vc2
TCACCTCCGTGAGCTTATTATAACGAGAATGCTGTACAATTTGTACGTAAAAGGTACCAAAATAAATTCAGTTAGTTGATTTGGTATTATATTTAGATAAAATATAACCAACGCATCGAAATAAACGCTCGTAGTTCTAAATATTTTAAACTGTGTTGTAATACACAATAACTTTGATGTTGATTGAATATTAATGAGGACTGTAAACTGTATAACAAGAGGCGGGAATAATATTCCAAGAAATGAGTTTTGGGTTAGGTATTTGATAGTAATATTAAGTATATCGAGTTTGTGTAGCTTTTCCACAGTTACATCAATTATTTAGATTATTCCCAAATAGTGAAAATCAATTATTTTCTACGACATACAACATATCGAAACGTAAACAAAAATAAGAAG…
>Ms1
TCACCTCCGTGAGCTTATTATAACGAGAATGCTGTACAATTTGTACGTAAAAGGTACCAAAATAAATTCAGTTAATTGATTTGGTATTATATTTAGATAAAATATAACCAACGCATCGAAATAAACGCTCGTAGTTCTAAATATTTTAAACTGTGTTGTAATACACAATAACTTTGATGTTGATTGAATATTAATGAGGACTGTAAACTGTATAACAAGAGGCGGGAATAATATTCCAAGAAATGAGTTTTGGGTTAGGTATTTGATAGTAATATTAAGTATATCGAGTTTGTGTAGCTTTTCCACAGTTACATCAATTATTTAAATTATTCCCAAATAGTGAAAATCAATTATTTTCTACGACATACAACATATCGAAACGTAAACAAAAATAAGAAG…
>Ms2
TCACCTCCGTGAGCTTATTATAACGAGAATKCTGTACAATTTGTACGTAAAAGGTACCAAAATAAATTCAGTTAATTGATTTGGTATTATATTTAGATAAAATAKAACCAACGCATCGAAATAAACGCTCGTAGTTCTAAATATTTTAAACYGTGTTGTAATACACAATAACTTTGATGTTGATTGAATATTAATGAGGACTGTAAACTGTATAACAASAGGCGGGAATAATATTCCAAGAAATGAGTTTTGGGTTAGGTATTTGATAGTAATATTAAGTATATCGAGTTTGTGTAGCTTTTCCACAGTTACATCAATTATTTAAATTATTCCCAAATAGTGAAAATCAATTATTTTCTACGACATACAACATATCGAAACGTAAACAAAAATAAGAAG…
>Ms3
TCACCTCCGTGAGCTTATTATAACGAGAATTCTGTACAATTTGTACGTAAAAGGTACCAAAATAAATTCAGTTAATTGATTTGGTATTATATTTAGATAAAATATAACCAACGCATCGAAATAAACGCTCGTAGTTCTAAATTTTTTAAGCTGTGTTGTAATACACAATAACTTTGATGTTGATTGAATATTAATGAGGTTTGTAAACTGTATAACAACAGGCGGGAATAATATTCCAAGAAATGAGTTTTGGGTTAGGTATTTGATAGTAATATTAAGTATATCGAGTTTGTGTAGCTTTTCCACAGTTACATCAATTATTTAAATTATTCCCAAATAGTGAAAATCAATTATTTTCTACGACATACAACATATCGAAACGTAAACAAAAATTAGAAG…
>Ms4
TCACCTCCGTGAGCTTATTATAACGAGAATGCTGTACAATTTGTACGTAAAAGGTACCAAAATAAATTCAGTTAATTGATTTGGTATTATATTTAGATAAAATATAACCAACGCATCGAAATAAACGCTCGTAGTTCTAAATATTTTAAACCGTGTTGTAATACACAATAACTTTGATGTTGATTGAATATTAATGAGGACTGTAAACTGTATAACAAGAGGCGGGAATAATATTCCAAGAAATGAGTTTTGGGTTAGGTATTTGATAGTAATATTAAGTATATCGAGTTTGTGTAGCTTTTCCACAGTTACATCAATTATTTAAATTATTCCCAAATAGTGAAAATCAATTATTTTCTACGACATACAACATATCGAAACGTAAACAAAAATAAGAAG…
>Ms5
TCACCTCCGTGAGCTTATTATAACGAGAATGCTGTACAATTTGTACGTAAAAGGTACCAAAATAAATTCAGTTGATTGATTTGGTATTATATTTAGATAAAATATAACCAACGCATCGAAATAAACGCTCGTAGTTCTAAATATTTTAAACTGTGTTGTAATACACAATAACTTTGATGTTGATTGAATATTAATGAGGACTGTAAACTGTATAACAACAGGCGGGAATAATATTCCAAGAAATGAGTTTTGGGTTAGGTATTTGATAGTAATATTAAGTATATCGAGTTTGTGTAGCTTTTCCACAGTTACATCAATTATTTAAATTATTCCCAAATAGTGAAAATCAATTATTTTCTACGACATACAACATATCGAAACGTAAACAAAAATAAGAAG…
>Ms6
TCACCTCCGTGAGCTTATTATAACGAGAATGCTGTACAATTTGTACGTAAAAGGTACCAAAATAAATTCAGTTAATTGATTTGGTATTATATTTAGATAAAATATAACCAACGCATCGAAATAAACGCTCGTAGTTCTAAATATTTTAAACCGTGTTGTAATACACAATAACTTTGATGTTGATTGAATATTAATGAGGACTGTAAACTGTATAACAAGAGGCGGGAATAATATTCCAAGAAATGAGTTTTGGGTTAGGTATTTGATAGTAATATTAAGTATATCGAGTTTGTGTAGCTTTTCCACAGTTACATCAATTATTTAAATTATTCCCAAATAGTGAAAATCAATTATTTTCTACGACATACAACATATCGAAACGTAAACAAAAATTAGAAG…
