# Supplementary material for: A large genomic insertion containing a duplicated follistatin gene is linked to the pea aphid male wing dimorphism
Source: eLife. 2020 Mar 6;9:e50608. doi: 10.7554/eLife.50608 (PMC7060042; doi:10.7554/eLife.50608)
Supplement: Source data 5. [file elife-50608-data5.xlsx]

## Sheet: Sheet1
Source data 3: Alignment of different biotype individuals inside the api region
>Mes1
AAAAGAATCATGAACTAATAAAACCATTTATTTTATGAATTTACGCGTTAACATTTTTATTTTTTGTTGATTGGTTTTCGAGATACAGCTCAGATTATCAGAGAATATAATCAGACAAATGGTACAGCTCAATAGCTATCTGCCGTCTGTAAAAAACCGACGCATACATGAAATATTATTTTCCAAAAACACGTATTCT---GTTGTCTATTTCTACGCAAATGTATTATTTCTTTTGTTTAAAAGTTGTAAAATAAGTACGAGTTTGCAGATAACCGTTTGAACACAATATTTTTTACACCTTTTTTCTATCGTACCTACCTATATTCCTTAAAATGTCTACTTTTTGACATACAAAAATTTAAAAATTATATATACATGATGATTTAGACCATTATA…
>Mes2
AAAAGAATCATGAACTAATAAAACCATTTATTTTATGAATTTACGCGTTAACATTTTTATTTTTTGTTGATTGGTTTTCGAGATACAGCTCAGATTATCAGAGAATATAATCAGACAAATGGTACAGCTCAATAGCTATCTGCCGTCTGTAAAAAACCGACGCATACATGAAATATTATTTTCCAAAAACACGTATTCT---GTTGTCTATTTCTACGCAAATGTATTATTTCTTTTGTTTAAAAGTTGTAAAATAAGTACGAGTTTGCAGATAACCGTTTGAACACAATATTTTTTACACCTTTTTTCTATCGTACCTACCTATATTCCTTAAAATGTCTACTTTTTGACATACAAAAATTTAAAAATTATATATACATGATGATTTAGACCATTATA…
>Mes3
AAAAGAATCATGAACTAATAAAACCATTTATTTTATGAATTTACGCGTTAACATTTTTATTTTTTGTTGATTGGTTTTCGAGATACAGCTCAGATTATCAGAGAATATAATCAGACAAATGGTACAGCTCAATAGCTATCTGCCGTCTGTAAAAAACCGACGCATACATGAAATATTATTTTCCAAAAACACGTATTCT---GTTGTCTATTTCTACGCAAATGTATTATTTCTTTTGTTTAAAAGTTGTAAAATAAGTACGAGTTTGCAGATAACCGTTTGAACACAATATTTTTTACACCTTTTTTCTATCGTACCTACCTATATTCCTTAAAATGTCTACTTTTTGACATACAAAAATTTAAAAATTATATATACATGATGATTTAGACCATTATA…
>Mes4
AAAAGTATCATGAACTAATAAAAGCATTTATTTTATGAATTTACGCGTTAACATTTTTATTTTTTGTTGATTGGTTTGCGAGATACAGCTCAGATTATCAGAGAATGCA--------AATGGTACAGCTCAATAGCTATCTACCGTCTGTAAAAAACGGACGCATACACGAAATATTATTTTCCAAAAACACGTATTCCGTAGTTGTCTATTTCTAAGCAAATGTATTATTTCTTTTGTTTAAAAGTTGTAAAATAAATGCGAGTTTGCAAATAACCATTTGAACACAATTTTTACACTTTTTTCTATCGTATCTACCTAGGTATATTCTTTAAAATATCTACTTTTTTGACATACAAAAATTTAAAA-------------------------------…
>Tp1
AAAAGAATCATGAACTAATAAAACCATTTATTTTATGAATTTACGCGTTAACATTTTTATTTTTTGTTGATTGGTTTTCGAGATACAGCTCAGATTATCAGAGAATATAATCAGACAAATGGTACAGCTCAATAGCTATCTGCCGTCTGTAAAAAACCGACGCATACATGAAATATTATTTTCCAAAAACACGTATTCT---GTTGTCTATTTCTACGCAAATGTATTATTTCTTTTGTTTAAAAGTTGTAAAATAAGTACGAGTTTGCAGATAACCGTTTGAACACAATATTTTTTACACCTTTTTTCTATCGTACCTACCTATATTCCTTAAAATGTCTACTTTTTGACATACAAAAATTTAAAAATTATATATACATGATGATTTAGACCATTATA…
>Tp2
AAAAGAATCATGAACTAATAAAACCATTTATTTTATGAATTTACGCGTTAACATTTTTATTTTTTGTTGATTGGTTTTCGAGATACAGCTCAGATTATCAGAGAATATAATCAGACAAATGGTACAGCTCAATAGCTATCTGCCGTCTGTAAAAAACCGACGCATACATGAAATATTATTTTCCAAAAACACGTATTCT---GTTGTCTATTTCTACGCAAATGTATTATTTCTTTTGTTTAAAAGTTGTAAAATAAGTACGAGTTTGCAGATAACCGTTTGAACACAATATTTTTTACACCTTTTTTCTATCGTACCTACCTATATTCCTTAAAATGTCTACTTTTTGACATACAAAAATTTAAAAATTATATATACATGATGATTTAGACCATTATA…
>Lap1
NNNNNNNNNATGAACTAATAAAACCATTTATTTTATGAATTTACGCGTTAACATTTTTATTTTTTGTTGATTGGTTTTCGAGATACAGCTCAGATTATCAGAGAATATANNNNNNNNNNNNNNNNNNNNNNNNNNNNNNNNNNNNNNNNNNNNNNNNNNNNNNNNNNNNNNNNNNNNNNNNNNNNNNNNNNNNNNNNNN---NNNNNNNNNNNNNNNNNNNNNNNNNNNNNNNNNNNNNNNNNNNNNNNNNNNNNNNNNNNNNNNNNNNNNNNNNNNNNNNNNNNNNNNNNNNNNNNNNNNNNNNNNNNNNNNNNNNNNNNNNNNNNNNNNNNNNNNNNNNNNNNNNNNNNNNNNNNNNNNNNNNNNNNNNNNNNNNNNNNNNNNNNNNNNNNNNNNNN…
>Lap2
NNNNNNNNNNNNNNNNNNNNNNNNNNNNNNNNNNNNNNNNNNNNNNNNNNNNNNNNNNNNNNNNNNNNNNNNNNNNNNNNNNNNNNNNNNNNNNNNNNNNNNNNNNNNNNNNNNNNNNNNNNNNNNNNNNNNNNNNNNNNNNNNNNNNNNNNNNNNNNNNNNNNNNNNNNNNNNNNNNNNNNNNNNNNNNNNNNNNNNN---NNNNNNNNNNNNNNNNNNNNNNNNNNNNNNNNNNNNNNNNNNNNNNNNNNNNNNNNNNNNNNNNNNNNNNNNNNNNNNNNNNNNNNNNNNNNNNNNNNNNNNNNNNNNNNNNNNNNNNNNNNNNNNNNNNNNNNNNNNNNNNNNNNNNNNNNNNNNNNNNNNNNNNNNNNNNNNNNNNNNNNNNNNNNNNNNNNNNN…
>Lap3
NNNNNNNNNNNNNNNNNNNNNNNNNNNNNNNNNNNNNNNNNNNNNNNNNNNNNNNNNNNNNNNNNNNNNNNNNNNNNNNNNNNNNNNNNNNNNNNNNNNNNNNNNNNNNNNNNNNNNNNNNNNNNNNNNNNNNNNNNNNNNNNNNNNNNNNNNNNNNNNNNNNNNNNNNNNNNNNNNNNNNNNNNNNNNNNNNNNNNNN---NNNNNNNNNNNNNNNNNNNNNNNNNNNNNNNNNNNNNNNNNNNNNNNNNNNNNNNNNNNNNNNNNNNNNNNNNNNNNNNNNNNNNNNNNNNNNNNNNNNNNNNNNNNNNNNNNNNNNNNNNNNNNNNNNNNNNNNNNNNNNNNNNNNNNNNNNNNNNNNNNNNNNNNNNNNNNNNNNNNNNNNNNNNNNNNNNNNNN…
>Ps1
AAAAGGATCATGAACTAATAAAAGCATTTATTTTATGAATTTACGCGTTAACATTTTTATTTTTTGTTGATTGGTTTGCGAGATACAGCTCAGATTATCAGAGAATGCA--------AATGGTACAGCTCAATAGCTATCTACCGTCTGTAAAAAACGGACGCATACACGAAACATTATTTTCCAAAAACACGTATTCCGTAGTTATCTATTTCTAAGCAAATGTATTATTTCTTTTGTTTAAAAGTTGTAAAATAAATGCGAGTTTGCAAATAACCGTTTGAACACAATTTTTACACTTTTTTCTATCGTACCTACCTAGGTATATTCTTTAAAATATCTACTTTTTTGACATACAAAAATTTAAAA-------------------------------…
>Ps2
WAAAGGATCATGAACTAATAAAAGCATTTATTTTATGAATTTACGCGTTAACATTTTTATTTTTTGTTGATTGGTTTGCGAGATACAGCTCAGATTATCAGAGAATGCA--------AATGGTACAGCTCAATAGCTATCTACCRTCTGTAAAAAACGGACGCATACACGAAATATTATTTTCCAAAAACACGTATTCCGTAGTTGTCTATTTCTAAGCAAATGTATTATTTCTTTTGTTTAAAAGTTGTAAAATAAATGCGAGTTTGCAAATAACCRYTTGAACACAATTTTTACACTTTTTTCTATCGTATCTACCTAGGTATATTCTTTAAAATATCTACTTTTTTGACATACAAAAATTTAAAA-------------------------------…
>Ps3
AAAAGGATCATGAACTAATAAAAGCATTTATTTTATGAATTTACGCGTTAACATTTTTATTTTTTGTTGATTGGTTTGCGAGATACAGCTCAGATTATCAGAGAATGCA--------AATGGTACAGCTCAATAGCTATCTACCRTCTGTAAAAAACGGACGCATACACGAAATATTATTTTCCAAAAACACGTATTCCRTAGTTGTCTATTTCTAAGCAAATGTATTATTTCTTTTGTTTAAAAGTTGTAAAATAAATGCGAGTTTGCAAATAACCATTTGAACACAATTTTTACACTTTTTTCTATCGTATCTACCTAGGTATATTCTTTAAAATATCTACTTTTTTGACATACAAAAATTTAAAA-------------------------------…
>Ps4
AAAAGAATCATGAACTAATAAAACCATTTATTTTATGAATTTACGCGTTAACATTTTTATTTTTTGTTGATTGGTTTTCGAGATACAGCTCAGATTATCAGAGAATATAATCAGACAAATGGTACAGCTCAATAGCTATCTGCCGTCTGTAAAAAACCGACGCATACATGAAATATTATTTTCCAAAAACACGTATTCT---GTTGTCTATTTCTACGCAAATGTATTATTTCTTTTGTTTAAAAGTTGTAAAATAAGTACGAGTTTGCAGATAACCGTTTGAACACAATATTTTTTACACCTTTTTTCTATCGTACCTACCTATATTCCTTAAAATGTCTACTTTTTGACATACAAAAATTTAAAAATTATATATACATGATGATTTAGACCATTATA…
>Ps5
AAAAGGATCATGAACTAATAAAAGCATTTATTTTATGAATTTACGCGTTAACATTTTTATTTTTTGTTGATTGGTTTGCGAGATACAGCTCAGATTATCAGAGAATGCA--------AATGGTACAGCTCAATAGCTATCTACCATCTGTAAAAAACGGACGCATACACGAAATATTATTTTCCAAAAACACGTATTCCGTAGTTGTCTATTTCTAAGCAAATGTATTATTTCTTTTGTTTAAAAGTTGTAAAATAAATGCGAGTTTGCAAATAACCATTTGAACACAATTTTTACACTTTTTTCTATCGTATCTACCTAGGTATATTCTTTAAAATATCTACTTTTTTGACATACAAAAATTTAAAA-------------------------------…
>Os
AAAAGAATCATGAACTAATAAAACCATTTATTTTATGAATTTACGCGTTAACATTTTTATTTTTTGTTGATTGGTTTTCGAGATACAGCTCAGATTATCAGAGAATATAATCAGACAAATGGTACAGCTCAATAGCTATCTGCCGTCTGTAAAAAACCGACGCATACATGAAATATTATTTTCCAAAAACACGTATTCT---GTTGTCTATTTCTACGCAAATGAATTATTTCTTTTGTTTAAAAGTTGTAAAATAAGTACGAGTTTGCAGATAACCGTTTGAACACAATATTTTTTACACCTTTTTTCTATCGTACCTACCTATATTCCTTAAAATGTCTACTTTTTGACATACAAAAATTTAAAAATTATATATACATGATGATTTAGACCATTATA…
>Cs
TAAAGGATCATGAACTAATAAAAGCATTTATTTTATGAATTTACGCGTTAACATTTTTATTTTTTGTTGATTGGTTTGCGAGATACAGCTCAGATTATCAGAGAATGCA--------AATGGTACAGCTCAATAGCTATCTACCGTCTGTAAAAAACGGACGCACACACGAAATATTATTTTCCAAAAACACGTATTCCATAGTTGTCTATTTCTAAGCAAATGTATTATTTCTTTTGTTTAAAAGTTGTAAAATAAATGCGAGTTTGCAAATAACCGCTTGAACACAATTTTTACACTTTTTTCTATCGTATCTACCTAGGTATATTCTTTAAAATATCTACTTTTTTGACATACAAAAATTTAAAA-------------------------------…
>Vc1
AAAAGGATCATGAACTAATAAAAGCATTTATTTTATGAATTTACGCGTTAACATTTTTATTTTTTGTTGATTGGTTTGCGAGATACAGCTCAGATTATCAGAGAATGCA--------AATGGTACAGCTCAATAGCTATCTACCGTCTGTAAAAAACGGACGCATACACGAAATATTATTTTCCAAAAACACGTATTCCGTAGTTGTCTTTTTCTAAGCAAATTTATTATTTCTTTTGTTTAAAAGTTGTAAAATAAATGCGAGTTTGCAAATAACCGTTTGAACACAATTTTTACACTTTTTTCTATCGTACCTACCTAGGTATAGTCTTTAAAATATCTACTTTTTTGACATACAAAAATTTAAAA-------------------------------…
>Vc2
AAAAGGATCATGAACTAATAAAAGCATTTATTTTATGAATTTACGCGTTAACATTTTTATTTTTTGTTGATTGGTTTGCGAGATACAGCTCAGATTATCAGAGAATGCA--------AATGGTACAGCTCAATAGCTATCTACCGTCTGTAAAAAACGGACGCATACACGAAATATTATTTTCCAAAAACACGTATTCCGTAGTTGTCTTTTTCTAAGCAAATTTATTATTTCTTTTGTTTAAAAGTTGTAAAATAAATGCGAGTTTGCAAATAACCGTTTGAACACAATTTTTACACTTTTTTCTATCGTACCTACCTAGGTATAGTCTTTAAAATATCTACTTTTTTGACATACAAAAATTTAAAA-------------------------------…
>Ms1
AAAAGAATCATGAACTAATAAAACCATTTATTTTATGAATTTACGCGTTAACATTTTTATTTTTTGTTGATTGGTTTTCGAGATACAGCTCAGATTATCAGAGAATATAATCAGACAAATGGTACAGCTCAATAGCTATCTGCCGTCTGTAAAAAACCGACGCATACATGAAATATTATTTTCCAAAAACACGTATTCT---GTTGTCTATTTCTACGCAAATGTATTATTTCTTTTGTTTAAAAGTTGTAAAATAAGTACGAGTTTGCAGATAACCGTTTGAACACAATATTTTTTACACCTTTTTTCTATCGTACCTACCTATATTCCTTAAAATGTCTACTTTTTGACATACAAAAATTTAAAAATTATATATACATGATGATTTAGACCATTATA…
>Ms2
AAAAGAATCATGAACTAATAAAACCATTTATTTTATGAATTTACGCGTTAACATTTTTATTTTTTGTTGATTGGTTTTCGAGATACAGCTCAGATTATCAGAGAATATAATCAGACAAATGGTACAGCTCAATAGCTATCTGCCGTCTGTAAAAAACCGACGCATACATGAAATATTATTTTCCAAAAACACGTATTCT---GTTGTCTATTTCTACGCAAATGTATTATTTCTTTTGTTTAAAAGTTGTAAAATAAGTACGAGTTTGCAGATAACCGTTTGAACACAATATTTTTTACACCTTTTTTCTATCGTACCTACCTATATTCCTTAAAATGTCTACTTTTTGACATACAAAAATTTAAAAATTATATATACATGATGATTTAGACCATTATA…
>Ms3
AAAAGAATCATGAACTAATAAAACCATTTATTTTATGAATTTACGCGTTAACATTTTTATTTTTTGTTGATTGGTTTTCGAGATACAGCTCAGATTATCAGAGAATATAATCAGACAAATGGTACAGCTCAATAGCTATCTGCCGTCTGTAAAAAACCGACGCATACATGAAATATTATTTTCCAAAAACACGTATTCT---GTTGTCTATTTCTACGCAAATGTATTATTTCTTTTGTTTAAAAGTTGTAAAATAAGTACGAGTTTGCAGATAACCGTTTGAACACAATNNNNNNNNNNNNNNNNNNNNNNNNNNNNNNNNNNNNTTCCTTAAAATGTCTACTTTTTGACATACAAAAATTTAAAAATTATATATACATGATGATTTAGACCATTATA…
>Ms4
AAAAGGATCATGAACTAATAAAAGCATTTATTTTATGAATTTACGCGTTAACATTTTTATTTTTTGTTGATTGGTTTGCGAGATACAGCTCAGATTATCAGAGAATGCA--------AATGGTACAGCTCAATAGCTATCTACCGTCTGTAAAAAACGGACGCATACACGAAATATTATTTTCCAAAAACACGTATTCCATAGTTGTCTATTTCTAAGCAAATGTATTATTTCTTTTGTTTAAAAGTTGTAAAATAAATGCGAGTTTGCAAATAACCATTTGAACACAATTTTTACACTTTTTTCTATCGTATCTACCTAGGTATATTCTTTAAAATATCTACTTTTTTGACATACAAAAATTTAAAA-------------------------------…
>Ms5
AAAAGAATCATGAACTAATAAAACCATTTATTTTATGAATTTACGCGTTAACATTTTTATTTTTTGTTGATTGGTTTTCGAGATACAGCTCAGATTATCAGAGAATATAATCAGACAAATGGTACAGCTCAATAGCTATCTGCCGTCTGTAAAAAACCGACGCATACATGAAATATTATTTTCCAAAAACACGTATTCT---GTTGTCTATTTCTACGCAAATGTATTATTTCTTTTGTTTAAAAGTTGTAAAATAAGTACGAGTTTGCAGATAACCGTTTGAACACAATATTTTTTACACCTTTTTTCTATCGTACCTACCTATATTCCTTAAAATGTCTACTTTTTGACATACAAAAATTTAAAAATTATATATACATGATGATTTAGACCATTATA…
>Ms6
AAAAGGATCATGAACTAATAAAAGCATTTATTTTATGAATTTACGCGTTAACATTTTTATTTTTTGTTGATTGGTTTGCGAGATACAGCTCAGATTATCAGAGAATGCA--------AATGGTACAGCTCAATAGCTATCTACCGTCTGTAAAAAACGGACGCATACACGAAATATTATTTTCCAAAAACACGTATTCCATAGTTGTCTATTTCTAAGCAAATGTATTATTTCTTTTGTTTAAAAGTTGTAAAATAAATGCGAGTTTGCAAATAACCATTTGAACACAATTTTTACACTTTTTTCTATCGTATCTACCTAGGTATATTCTTTAAAATATCTACTTTTTTGACATACAAAAATTTAAAA-------------------------------…
