# Supplementary material for: A large genomic insertion containing a duplicated follistatin gene is linked to the pea aphid male wing dimorphism
Source: eLife. 2020 Mar 6;9:e50608. doi: 10.7554/eLife.50608 (PMC7060042; doi:10.7554/eLife.50608)
Supplement: Source data 6. [file elife-50608-data6.xlsx]

## Sheet: Sheet1
Source data 6: between biotype dS comparisons
Gene	ds	Length-N
ACYPI000233-RA	0	300
ACYPI001708-RA	0	300
ACYPI007535-RA	0	300
ACYPI060139-RA	0	300
ACYPI061561-RA	0	300
ACYPI062504-RA	0	300
ACYPI063203-RA	0	300
ACYPI064983-RA	0	300
ACYPI066619-RA	0	300
ACYPI067618-RA	0	300
ACYPI068659-RA	0	300
ACYPI073186-RA	0	300
ACYPI073752-RA	0	300
ACYPI080336-RA	0	300
ACYPI081037-RA	0	300
ACYPI081862-RA	0	300
ACYPI082200-RA	0	300
ACYPI083804-RA	0	300
ACYPI084990-RA	0	300
ACYPI085080-RA	0	300
ACYPI087176-RA	0	300
ACYPI087290-RA	0	300
ACYPI087394-RA	0	300
ACYPI088255-RA	0	300
ACYPI088483-RA	0	300
ACYPI088586-RA	0	300
ACYPI088887-RA	0	300
ACYPI20389-RA	0	300
ACYPI28429-RA	0	300
ACYPI30374-RA	0	300
ACYPI36324-RA	0	300
ACYPI47317-RA	0	300
ACYPI47628-RA	0	300
ACYPI48306-RA	0	300
ACYPI49881-RA	0	300
ACYPI55487-RA	0	300
ACYPI55936-RA	0	300
ACYPI56369-RA	0	300
ACYPI082709-RA	0.013	300
ACYPI071685-RA	0.0134	300
ACYPI082394-RA	0.014	300
ACYPI45004-RA	0.0145	300
ACYPI085725-RA	0.0158	300
ACYPI082022-RA	0.0162	300
ACYPI061679-RA	0.0166	300
ACYPI26172-RA	0.0169	300
ACYPI41459-RA	0.0169	300
ACYPI006429-RA	0.0206	300
ACYPI081510-RA	0.0308	300
ACYPI084699-RA	0.0404	300
ACYPI36082-RA	0.0479	300
ACYPI062018-RA	0.05	300
ACYPI061646-RA	0	301
ACYPI000043-RA	0	303
ACYPI004033-RA	0	303
ACYPI005109-RA	0	303
ACYPI005317-RA	0	303
ACYPI005624-RA	0	303
ACYPI060741-RA	0	303
ACYPI064232-RA	0	303
ACYPI066740-RA	0	303
ACYPI069073-RA	0	303
ACYPI069611-RA	0	303
ACYPI070350-RA	0	303
ACYPI072012-RA	0	303
ACYPI080120-RA	0	303
ACYPI080214-RA	0	303
ACYPI080229-RA	0	303
ACYPI080888-RA	0	303
ACYPI081518-RA	0	303
ACYPI082233-RA	0	303
ACYPI082474-RA	0	303
ACYPI082730-RA	0	303
ACYPI082925-RA	0	303
ACYPI084061-RA	0	303
ACYPI084279-RA	0	303
ACYPI084331-RA	0	303
ACYPI084877-RA	0	303
ACYPI085148-RA	0	303
ACYPI085574-RA	0	303
ACYPI086710-RA	0	303
ACYPI086828-RA	0	303
ACYPI087284-RA	0	303
ACYPI087803-RA	0	303
ACYPI087906-RA	0	303
ACYPI088998-RA	0	303
ACYPI089299-RA	0	303
ACYPI089317-RA	0	303
ACYPI23466-RA	0	303
ACYPI39795-RA	0	303
ACYPI40705-RA	0	303
ACYPI41175-RA	0	303
ACYPI48962-RA	0	303
ACYPI54606-RA	0	303
ACYPI080338-RA	0.0124	303
ACYPI082559-RA	0.013	303
ACYPI072187-RA	0.0148	303
ACYPI082708-RA	0.0151	303
ACYPI085655-RA	0.0153	303
ACYPI54131-RA	0.0159	303
ACYPI005159-RA	0.016	303
ACYPI086888-RA	0.0163	303
ACYPI067025-RA	0.0463	303
ACYPI070295-RA	0	304
ACYPI24359-RA	0	304
ACYPI082567-RA	0.0142	305
ACYPI001169-RA	0	306
ACYPI003952-RA	0	306
ACYPI063021-RA	0	306
ACYPI063371-RA	0	306
ACYPI063440-RA	0	306
ACYPI064616-RA	0	306
ACYPI067883-RA	0	306
ACYPI068997-RA	0	306
ACYPI071449-RA	0	306
ACYPI081121-RA	0	306
ACYPI082274-RA	0	306
ACYPI082478-RA	0	306
ACYPI083751-RA	0	306
ACYPI084446-RA	0	306
ACYPI085538-RA	0	306
ACYPI085546-RA	0	306
ACYPI086345-RA	0	306
ACYPI086417-RA	0	306
ACYPI087477-RA	0	306
ACYPI087768-RA	0	306
ACYPI088962-RA	0	306
ACYPI089148-RA	0	306
ACYPI35069-RA	0	306
ACYPI36668-RA	0	306
ACYPI40782-RA	0	306
ACYPI42006-RA	0	306
ACYPI42326-RA	0	306
ACYPI44070-RA	0	306
ACYPI45216-RA	0	306
ACYPI46839-RA	0	306
ACYPI49985-RA	0	306
ACYPI53717-RA	0	306
ACYPI54963-RA	0	306
ACYPI000693-RA	0.0142	306
ACYPI21030-RA	0.0143	306
ACYPI004603-RA	0.0145	306
ACYPI49409-RA	0.0158	306
ACYPI45792-RA	0.0183	306
ACYPI081453-RA	0.0184	306
ACYPI082651-RA	0.0188	306
ACYPI083112-RA	0.0284	306
ACYPI086016-RA	0.0302	306
ACYPI080686-RA	0	307
ACYPI52447-RA	0.0123	307
ACYPI068036-RA	0	308
ACYPI083970-RA	0	308
ACYPI088945-RA	0	308
ACYPI003366-RA	0	309
ACYPI063692-RA	0	309
ACYPI064320-RA	0	309
ACYPI065043-RA	0	309
ACYPI065639-RA	0	309
ACYPI065936-RA	0	309
ACYPI070675-RA	0	309
ACYPI071218-RA	0	309
ACYPI073493-RA	0	309
ACYPI073884-RA	0	309
ACYPI080773-RA	0	309
ACYPI081517-RA	0	309
ACYPI082736-RA	0	309
ACYPI083652-RA	0	309
ACYPI083810-RA	0	309
ACYPI084858-RA	0	309
ACYPI085620-RA	0	309
ACYPI085785-RA	0	309
ACYPI085840-RA	0	309
ACYPI086443-RA	0	309
ACYPI086972-RA	0	309
ACYPI087043-RA	0	309
ACYPI087681-RA	0	309
ACYPI088017-RA	0	309
ACYPI23774-RA	0	309
ACYPI29867-RA	0	309
ACYPI37926-RA	0	309
ACYPI38390-RA	0	309
ACYPI45233-RA	0	309
ACYPI51925-RA	0	309
ACYPI52812-RA	0	309
ACYPI53971-RA	0	309
ACYPI54766-RA	0	309
ACYPI55488-RA	0	309
ACYPI56016-RA	0	309
ACYPI56054-RA	0	309
ACYPI088094-RA	0.0128	309
ACYPI084473-RA	0.0135	309
ACYPI21979-RA	0.0138	309
ACYPI006742-RA	0.0144	309
ACYPI061186-RA	0.015	309
ACYPI002903-RA	0.0153	309
ACYPI000351-RA	0.0168	309
ACYPI083149-RA	0.0251	309
ACYPI42427-RA	0	310
ACYPI48186-RA	0.0505	310
ACYPI080414-RA	0	311
ACYPI088597-RA	0	311
ACYPI000042-RA	0	312
ACYPI002113-RA	0	312
ACYPI005818-RA	0	312
ACYPI008610-RA	0	312
ACYPI061609-RA	0	312
ACYPI062987-RA	0	312
ACYPI064270-RA	0	312
ACYPI068813-RA	0	312
ACYPI069051-RA	0	312
ACYPI070118-RA	0	312
ACYPI080260-RA	0	312
ACYPI081671-RA	0	312
ACYPI082965-RA	0	312
ACYPI083030-RA	0	312
ACYPI084599-RA	0	312
ACYPI084953-RA	0	312
ACYPI085045-RA	0	312
ACYPI085105-RA	0	312
ACYPI085455-RA	0	312
ACYPI085594-RA	0	312
ACYPI086160-RA	0	312
ACYPI086639-RA	0	312
ACYPI087298-RA	0	312
ACYPI088008-RA	0	312
ACYPI088978-RA	0	312
ACYPI29854-RA	0	312
ACYPI31681-RA	0	312
ACYPI32085-RA	0	312
ACYPI50171-RA	0	312
ACYPI51289-RA	0	312
ACYPI55739-RA	0	312
ACYPI060039-RA	0.012	312
ACYPI085026-RA	0.0128	312
ACYPI080893-RA	0.013	312
ACYPI29768-RA	0.0135	312
ACYPI080709-RA	0.0147	312
ACYPI45322-RA	0.015	312
ACYPI083340-RA	0.0152	312
ACYPI42738-RA	0.0316	312
ACYPI001038-RA	0.0385	312
ACYPI072124-RA	0.0484	312
ACYPI066667-RA	0.0523	312
ACYPI086857-RA	0	313
ACYPI47959-RA	0	313
ACYPI52864-RA	0	313
ACYPI086564-RA	0.0291	313
ACYPI000041-RA	0	315
ACYPI000896-RA	0	315
ACYPI006526-RA	0	315
ACYPI007413-RA	0	315
ACYPI060664-RA	0	315
ACYPI061451-RA	0	315
ACYPI061628-RA	0	315
ACYPI064901-RA	0	315
ACYPI066153-RA	0	315
ACYPI066676-RA	0	315
ACYPI068505-RA	0	315
ACYPI069514-RA	0	315
ACYPI080369-RA	0	315
ACYPI081470-RA	0	315
ACYPI084957-RA	0	315
ACYPI086120-RA	0	315
ACYPI087744-RA	0	315
ACYPI088369-RA	0	315
ACYPI088696-RA	0	315
ACYPI089107-RA	0	315
ACYPI089374-RA	0	315
ACYPI20617-RA	0	315
ACYPI30967-RA	0	315
ACYPI32264-RA	0	315
ACYPI39380-RA	0	315
ACYPI40207-RA	0	315
ACYPI40795-RA	0	315
ACYPI46037-RA	0	315
ACYPI52972-RA	0	315
ACYPI55440-RA	0	315
ACYPI070020-RA	0.0126	315
ACYPI087649-RA	0.0128	315
ACYPI086597-RA	0.0143	315
ACYPI46241-RA	0.0146	315
ACYPI27704-RA	0.0159	315
ACYPI088149-RA	0.016	315
ACYPI080508-RA	0.0164	315
ACYPI002924-RA	0.0168	315
ACYPI062416-RA	0.0168	315
ACYPI071763-RA	0.0173	315
ACYPI084623-RA	0.0178	315
ACYPI20897-RA	0.0297	315
ACYPI065909-RA	0.0312	315
ACYPI071382-RA	0.0495	315
ACYPI087545-RA	0	317
ACYPI000835-RA	0	318
ACYPI001101-RA	0	318
ACYPI001781-RA	0	318
ACYPI009665-RA	0	318
ACYPI060162-RA	0	318
ACYPI060223-RA	0	318
ACYPI065024-RA	0	318
ACYPI066348-RA	0	318
ACYPI066881-RA	0	318
ACYPI069396-RA	0	318
ACYPI073716-RA	0	318
ACYPI073749-RA	0	318
ACYPI080195-RA	0	318
ACYPI080320-RA	0	318
ACYPI080343-RA	0	318
ACYPI080567-RA	0	318
ACYPI081031-RA	0	318
ACYPI081400-RA	0	318
ACYPI081608-RA	0	318
ACYPI081661-RA	0	318
ACYPI082360-RA	0	318
ACYPI083296-RA	0	318
ACYPI083949-RA	0	318
ACYPI084907-RA	0	318
ACYPI085385-RA	0	318
ACYPI087218-RA	0	318
ACYPI087568-RA	0	318
ACYPI087692-RA	0	318
ACYPI088179-RA	0	318
ACYPI23123-RA	0	318
ACYPI31334-RA	0	318
ACYPI34559-RA	0	318
ACYPI40570-RA	0	318
ACYPI47092-RA	0	318
ACYPI48371-RA	0	318
ACYPI52862-RA	0	318
ACYPI54049-RA	0	318
ACYPI54637-RA	0	318
ACYPI56726-RA	0	318
ACYPI32389-RA	0.0134	318
ACYPI065017-RA	0.0144	318
ACYPI49155-RA	0.0144	318
ACYPI005630-RA	0.0155	318
ACYPI087849-RA	0.0164	318
ACYPI43951-RA	0.0172	318
ACYPI066138-RA	0.0302	318
ACYPI20398-RA	0.0314	318
ACYPI080031-RA	0.0341	318
ACYPI065239-RA	0	319
ACYPI38216-RA	0.0144	319
ACYPI060695-RA	0.0155	319
ACYPI003212-RA	0	321
ACYPI004493-RA	0	321
ACYPI008615-RA	0	321
ACYPI060081-RA	0	321
ACYPI062818-RA	0	321
ACYPI064255-RA	0	321
ACYPI065943-RA	0	321
ACYPI066266-RA	0	321
ACYPI068616-RA	0	321
ACYPI072274-RA	0	321
ACYPI073398-RA	0	321
ACYPI081035-RA	0	321
ACYPI081363-RA	0	321
ACYPI081431-RA	0	321
ACYPI082589-RA	0	321
ACYPI082716-RA	0	321
ACYPI083849-RA	0	321
ACYPI084100-RA	0	321
ACYPI084220-RA	0	321
ACYPI084580-RA	0	321
ACYPI085190-RA	0	321
ACYPI085604-RA	0	321
ACYPI086767-RA	0	321
ACYPI087136-RA	0	321
ACYPI087273-RA	0	321
ACYPI087652-RA	0	321
ACYPI089096-RA	0	321
ACYPI28295-RA	0	321
ACYPI32480-RA	0	321
ACYPI34540-RA	0	321
ACYPI43707-RA	0	321
ACYPI088878-RA	0.0137	321
ACYPI20669-RA	0.0141	321
ACYPI073209-RA	0.0144	321
ACYPI30902-RA	0.0149	321
ACYPI43114-RA	0.0149	321
ACYPI43962-RA	0.0151	321
ACYPI082577-RA	0.0152	321
ACYPI084537-RA	0.0157	321
ACYPI086556-RA	0.0157	321
ACYPI073177-RA	0.027	321
ACYPI069359-RA	0.0476	321
ACYPI008667-RA	0.0646	321
ACYPI068115-RA	0	322
ACYPI49358-RA	0.0133	322
ACYPI066457-RA	0	323
ACYPI000075-RA	0	324
ACYPI008033-RA	0	324
ACYPI063132-RA	0	324
ACYPI071096-RA	0	324
ACYPI072425-RA	0	324
ACYPI080075-RA	0	324
ACYPI081345-RA	0	324
ACYPI082418-RA	0	324
ACYPI083894-RA	0	324
ACYPI084099-RA	0	324
ACYPI085645-RA	0	324
ACYPI085744-RA	0	324
ACYPI086746-RA	0	324
ACYPI089154-RA	0	324
ACYPI22938-RA	0	324
ACYPI23473-RA	0	324
ACYPI35623-RA	0	324
ACYPI37304-RA	0	324
ACYPI41227-RA	0	324
ACYPI45333-RA	0	324
ACYPI46539-RA	0	324
ACYPI49114-RA	0	324
ACYPI49489-RA	0	324
ACYPI49532-RA	0	324
ACYPI50118-RA	0	324
ACYPI51900-RA	0	324
ACYPI55228-RA	0	324
ACYPI071679-RA	0.0074	324
ACYPI24605-RA	0.0128	324
ACYPI087532-RA	0.0134	324
ACYPI085428-RA	0.0145	324
ACYPI065118-RA	0.0146	324
ACYPI087552-RA	0.0149	324
ACYPI084463-RA	0.0151	324
ACYPI000775-RA	0.0152	324
ACYPI085587-RA	0.0157	324
ACYPI000712-RA	0.0163	324
ACYPI44866-RA	0.0286	324
ACYPI061891-RA	0.0302	324
ACYPI089389-RA	0.0305	324
ACYPI44768-RA	0.038	324
ACYPI008389-RA	0	325
ACYPI009532-RA	0	325
ACYPI004856-RA	0	327
ACYPI005571-RA	0	327
ACYPI006902-RA	0	327
ACYPI007494-RA	0	327
ACYPI008616-RA	0	327
ACYPI060079-RA	0	327
ACYPI061760-RA	0	327
ACYPI068752-RA	0	327
ACYPI069100-RA	0	327
ACYPI069112-RA	0	327
ACYPI080091-RA	0	327
ACYPI081547-RA	0	327
ACYPI082904-RA	0	327
ACYPI086592-RA	0	327
ACYPI087763-RA	0	327
ACYPI088098-RA	0	327
ACYPI088999-RA	0	327
ACYPI089592-RA	0	327
ACYPI32864-RA	0	327
ACYPI35620-RA	0	327
ACYPI38022-RA	0	327
ACYPI39151-RA	0	327
ACYPI39900-RA	0	327
ACYPI50355-RA	0	327
ACYPI51805-RA	0	327
ACYPI52845-RA	0	327
ACYPI55687-RA	0	327
ACYPI081378-RA	0.0137	327
ACYPI39221-RA	0.0138	327
ACYPI080406-RA	0.014	327
ACYPI005843-RA	0.0141	327
ACYPI065403-RA	0.0149	327
ACYPI27822-RA	0.015	327
ACYPI005987-RA	0.0157	327
ACYPI010115-RA	0.0157	327
ACYPI066719-RA	0.027	327
ACYPI006920-RA	0.0476	327
ACYPI003526-RA	0	328
ACYPI43639-RA	0	329
ACYPI000205-RA	0	330
ACYPI001346-RA	0	330
ACYPI002704-RA	0	330
ACYPI003216-RA	0	330
ACYPI004195-RA	0	330
ACYPI060710-RA	0	330
ACYPI064108-RA	0	330
ACYPI067536-RA	0	330
ACYPI071066-RA	0	330
ACYPI073877-RA	0	330
ACYPI080264-RA	0	330
ACYPI080433-RA	0	330
ACYPI081643-RA	0	330
ACYPI082191-RA	0	330
ACYPI082198-RA	0	330
ACYPI084027-RA	0	330
ACYPI085281-RA	0	330
ACYPI087518-RA	0	330
ACYPI087983-RA	0	330
ACYPI089198-RA	0	330
ACYPI089289-RA	0	330
ACYPI32827-RA	0	330
ACYPI38269-RA	0	330
ACYPI49174-RA	0	330
ACYPI55558-RA	0	330
ACYPI082767-RA	0.0123	330
ACYPI29370-RA	0.0125	330
ACYPI005671-RA	0.0155	330
ACYPI089066-RA	0.0157	330
ACYPI003274-RA	0.0158	330
ACYPI087668-RA	0.016	330
ACYPI20859-RA	0.0162	330
ACYPI087831-RA	0.0163	330
ACYPI009894-RA	0.045	330
ACYPI062549-RA	0.0587	330
ACYPI24054-RA	0	331
ACYPI28115-RA	0	331
ACYPI005425-RA	0	333
ACYPI007993-RA	0	333
ACYPI009041-RA	0	333
ACYPI060387-RA	0	333
ACYPI060765-RA	0	333
ACYPI063799-RA	0	333
ACYPI069322-RA	0	333
ACYPI071597-RA	0	333
ACYPI072920-RA	0	333
ACYPI080768-RA	0	333
ACYPI080801-RA	0	333
ACYPI084152-RA	0	333
ACYPI085181-RA	0	333
ACYPI086176-RA	0	333
ACYPI086705-RA	0	333
ACYPI088588-RA	0	333
ACYPI089071-RA	0	333
ACYPI21874-RA	0	333
ACYPI25621-RA	0	333
ACYPI30531-RA	0	333
ACYPI31404-RA	0	333
ACYPI38045-RA	0	333
ACYPI41695-RA	0	333
ACYPI50715-RA	0	333
ACYPI52079-RA	0	333
ACYPI087048-RA	0.0119	333
ACYPI46790-RA	0.013	333
ACYPI070982-RA	0.0138	333
ACYPI009324-RA	0.0144	333
ACYPI081548-RA	0.0147	333
ACYPI082091-RA	0.0148	333
ACYPI080902-RA	0.0152	333
ACYPI081668-RA	0.0158	333
ACYPI082037-RA	0.0231	333
ACYPI36661-RA	0.0245	333
ACYPI003647-RA	0.0326	334
ACYPI000206-RA	0	336
ACYPI003788-RA	0	336
ACYPI007308-RA	0	336
ACYPI009205-RA	0	336
ACYPI009597-RA	0	336
ACYPI060417-RA	0	336
ACYPI065791-RA	0	336
ACYPI066313-RA	0	336
ACYPI068361-RA	0	336
ACYPI070957-RA	0	336
ACYPI080441-RA	0	336
ACYPI081492-RA	0	336
ACYPI081835-RA	0	336
ACYPI082357-RA	0	336
ACYPI082745-RA	0	336
ACYPI082919-RA	0	336
ACYPI083116-RA	0	336
ACYPI083942-RA	0	336
ACYPI083963-RA	0	336
ACYPI085969-RA	0	336
ACYPI087245-RA	0	336
ACYPI087369-RA	0	336
ACYPI088770-RA	0	336
ACYPI21192-RA	0	336
ACYPI29068-RA	0	336
ACYPI30335-RA	0	336
ACYPI31027-RA	0	336
ACYPI49979-RA	0	336
ACYPI51321-RA	0	336
ACYPI53871-RA	0	336
ACYPI54405-RA	0	336
ACYPI070484-RA	0.0123	336
ACYPI081167-RA	0.0133	336
ACYPI002961-RA	0.0136	336
ACYPI44554-RA	0.0137	336
ACYPI086818-RA	0.014	336
ACYPI23749-RA	0.014	336
ACYPI39463-RA	0.0149	336
ACYPI082323-RA	0.0152	336
ACYPI31697-RA	0.0152	336
ACYPI071331-RA	0.016	336
ACYPI083460-RA	0.0273	336
ACYPI30670-RA	0.0349	336
ACYPI29591-RA	0.0415	336
ACYPI063385-RA	0	337
ACYPI087464-RA	0	337
ACYPI30630-RA	0	337
ACYPI085458-RA	0.0132	337
ACYPI39690-RA	0.0157	337
ACYPI41453-RA	0.0437	337
ACYPI000222-RA	0	339
ACYPI001754-RA	0	339
ACYPI005466-RA	0	339
ACYPI007022-RA	0	339
ACYPI008296-RA	0	339
ACYPI008818-RA	0	339
ACYPI009603-RA	0	339
ACYPI061974-RA	0	339
ACYPI063619-RA	0	339
ACYPI064157-RA	0	339
ACYPI066061-RA	0	339
ACYPI067564-RA	0	339
ACYPI068670-RA	0	339
ACYPI070390-RA	0	339
ACYPI071210-RA	0	339
ACYPI071246-RA	0	339
ACYPI072970-RA	0	339
ACYPI080317-RA	0	339
ACYPI081193-RA	0	339
ACYPI082300-RA	0	339
ACYPI082828-RA	0	339
ACYPI083404-RA	0	339
ACYPI087601-RA	0	339
ACYPI088664-RA	0	339
ACYPI24881-RA	0	339
ACYPI25548-RA	0	339
ACYPI33424-RA	0	339
ACYPI54517-RA	0	339
ACYPI088496-RA	0.0105	339
ACYPI085104-RA	0.0121	339
ACYPI080898-RA	0.0139	339
ACYPI085378-RA	0.0144	339
ACYPI55757-RA	0.0144	339
ACYPI007048-RA	0.015	339
ACYPI55671-RA	0.0155	339
ACYPI20031-RA	0.0157	339
ACYPI32842-RA	0.0228	339
ACYPI081021-RA	0.0307	339
ACYPI083596-RA	0.0525	339
ACYPI080296-RA	0	340
ACYPI080444-RA	0	340
ACYPI44476-RA	0.0127	340
ACYPI27908-RA	0.0128	340
ACYPI064283-RA	0	341
ACYPI083651-RA	0	341
ACYPI006776-RA	0	342
ACYPI060880-RA	0	342
ACYPI062345-RA	0	342
ACYPI063179-RA	0	342
ACYPI064995-RA	0	342
ACYPI065808-RA	0	342
ACYPI070625-RA	0	342
ACYPI073847-RA	0	342
ACYPI080346-RA	0	342
ACYPI081019-RA	0	342
ACYPI081364-RA	0	342
ACYPI081478-RA	0	342
ACYPI081772-RA	0	342
ACYPI081939-RA	0	342
ACYPI083065-RA	0	342
ACYPI084372-RA	0	342
ACYPI084954-RA	0	342
ACYPI085042-RA	0	342
ACYPI085185-RA	0	342
ACYPI087553-RA	0	342
ACYPI087608-RA	0	342
ACYPI20393-RA	0	342
ACYPI46260-RA	0	342
ACYPI082098-RA	0.0124	342
ACYPI080252-RA	0.0127	342
ACYPI007008-RA	0.013	342
ACYPI087087-RA	0.0133	342
ACYPI067529-RA	0.0142	342
ACYPI35813-RA	0.0142	342
ACYPI36431-RA	0.0143	342
ACYPI004208-RA	0.0147	342
ACYPI24964-RA	0.0151	342
ACYPI085517-RA	0.0157	342
ACYPI22671-RA	0.016	342
ACYPI087183-RA	0.0274	342
ACYPI24130-RA	0.0303	342
ACYPI087231-RA	0.0386	342
ACYPI37540-RA	0.0406	342
ACYPI087887-RA	0.0425	342
ACYPI38875-RA	0.0133	343
ACYPI087333-RA	0	343
ACYPI31804-RA	0	343
ACYPI008014-RA	0	345
ACYPI009014-RA	0	345
ACYPI061586-RA	0	345
ACYPI061837-RA	0	345
ACYPI064549-RA	0	345
ACYPI066111-RA	0	345
ACYPI066116-RA	0	345
ACYPI066365-RA	0	345
ACYPI068633-RA	0	345
ACYPI073403-RA	0	345
ACYPI082888-RA	0	345
ACYPI084217-RA	0	345
ACYPI084860-RA	0	345
ACYPI085325-RA	0	345
ACYPI085424-RA	0	345
ACYPI086520-RA	0	345
ACYPI086579-RA	0	345
ACYPI087453-RA	0	345
ACYPI088806-RA	0	345
ACYPI089414-RA	0	345
ACYPI20258-RA	0	345
ACYPI25643-RA	0	345
ACYPI28733-RA	0	345
ACYPI30749-RA	0	345
ACYPI31228-RA	0	345
ACYPI32142-RA	0	345
ACYPI35161-RA	0	345
ACYPI36926-RA	0	345
ACYPI44794-RA	0	345
ACYPI46398-RA	0	345
ACYPI49745-RA	0.013	345
ACYPI28276-RA	0.0135	345
ACYPI085308-RA	0.0137	345
ACYPI073846-RA	0.014	345
ACYPI004994-RA	0.0142	345
ACYPI082083-RA	0.0145	345
ACYPI28318-RA	0.0145	345
ACYPI51127-RA	0.0146	345
ACYPI001714-RA	0.0158	345
ACYPI001828-RA	0.0293	345
ACYPI20948-RA	0	346
ACYPI007001-RA	0.0393	346
ACYPI000039-RA	0	348
ACYPI001787-RA	0	348
ACYPI003547-RA	0	348
ACYPI003686-RA	0	348
ACYPI005784-RA	0	348
ACYPI005968-RA	0	348
ACYPI008768-RA	0	348
ACYPI010044-RA	0	348
ACYPI061502-RA	0	348
ACYPI061659-RA	0	348
ACYPI062537-RA	0	348
ACYPI062988-RA	0	348
ACYPI071319-RA	0	348
ACYPI080862-RA	0	348
ACYPI081276-RA	0	348
ACYPI081484-RA	0	348
ACYPI082089-RA	0	348
ACYPI082571-RA	0	348
ACYPI083156-RA	0	348
ACYPI083179-RA	0	348
ACYPI084441-RA	0	348
ACYPI084624-RA	0	348
ACYPI086040-RA	0	348
ACYPI088141-RA	0	348
ACYPI089044-RA	0	348
ACYPI23083-RA	0	348
ACYPI30970-RA	0	348
ACYPI34998-RA	0	348
ACYPI37877-RA	0	348
ACYPI39155-RA	0	348
ACYPI44014-RA	0	348
ACYPI086014-RA	0.0117	348
ACYPI085373-RA	0.0118	348
ACYPI43956-RA	0.0121	348
ACYPI087704-RA	0.0134	348
ACYPI49456-RA	0.0137	348
ACYPI005723-RA	0.0144	348
ACYPI087761-RA	0.0147	348
ACYPI000245-RA	0.026	348
ACYPI29473-RA	0	349
ACYPI000038-RA	0	351
ACYPI000859-RA	0	351
ACYPI001147-RA	0	351
ACYPI001681-RA	0	351
ACYPI001868-RA	0	351
ACYPI005197-RA	0	351
ACYPI006158-RA	0	351
ACYPI008208-RA	0	351
ACYPI008513-RA	0	351
ACYPI062678-RA	0	351
ACYPI064193-RA	0	351
ACYPI065992-RA	0	351
ACYPI066567-RA	0	351
ACYPI067972-RA	0	351
ACYPI068646-RA	0	351
ACYPI069482-RA	0	351
ACYPI073546-RA	0	351
ACYPI081036-RA	0	351
ACYPI081119-RA	0	351
ACYPI083231-RA	0	351
ACYPI083624-RA	0	351
ACYPI083900-RA	0	351
ACYPI086482-RA	0	351
ACYPI086703-RA	0	351
ACYPI087410-RA	0	351
ACYPI088137-RA	0	351
ACYPI088735-RA	0	351
ACYPI088896-RA	0	351
ACYPI089152-RA	0	351
ACYPI22971-RA	0	351
ACYPI24428-RA	0	351
ACYPI27513-RA	0	351
ACYPI29076-RA	0	351
ACYPI30284-RA	0	351
ACYPI37185-RA	0	351
ACYPI44311-RA	0	351
ACYPI061655-RA	0.0072	351
ACYPI086111-RA	0.0106	351
ACYPI004281-RA	0.0117	351
ACYPI005612-RA	0.0128	351
ACYPI080598-RA	0.0128	351
ACYPI069952-RA	0.0129	351
ACYPI009119-RA	0.0143	351
ACYPI23556-RA	0.0143	351
ACYPI071309-RA	0.0153	351
ACYPI38569-RA	0.0156	351
ACYPI087588-RA	0.0201	351
ACYPI082442-RA	0.0229	351
ACYPI009327-RA	0.026	351
ACYPI000037-RA	0.0268	351
ACYPI081190-RA	0.0367	351
ACYPI072638-RA	0.0405	351
ACYPI070496-RA	0.0667	351
ACYPI071952-RA	0	352
ACYPI088813-RA	0	352
ACYPI28522-RA	0	352
ACYPI007508-RA	0.0116	352
ACYPI081888-RA	0.0435	352
ACYPI086605-RA	0	352
ACYPI002601-RA	0	354
ACYPI003910-RA	0	354
ACYPI060405-RA	0	354
ACYPI064147-RA	0	354
ACYPI064566-RA	0	354
ACYPI065641-RA	0	354
ACYPI066557-RA	0	354
ACYPI067434-RA	0	354
ACYPI069474-RA	0	354
ACYPI069805-RA	0	354
ACYPI072027-RA	0	354
ACYPI072338-RA	0	354
ACYPI072697-RA	0	354
ACYPI073224-RA	0	354
ACYPI082363-RA	0	354
ACYPI082440-RA	0	354
ACYPI082469-RA	0	354
ACYPI082867-RA	0	354
ACYPI084998-RA	0	354
ACYPI086222-RA	0	354
ACYPI087549-RA	0	354
ACYPI088494-RA	0	354
ACYPI25553-RA	0	354
ACYPI33056-RA	0	354
ACYPI34441-RA	0	354
ACYPI37292-RA	0	354
ACYPI44173-RA	0	354
ACYPI45593-RA	0	354
ACYPI47023-RA	0	354
ACYPI49794-RA	0	354
ACYPI50173-RA	0	354
ACYPI084260-RA	0.01	354
ACYPI009287-RA	0.0122	354
ACYPI54672-RA	0.0126	354
ACYPI083855-RA	0.0134	354
ACYPI47875-RA	0.0135	354
ACYPI20125-RA	0.014	354
ACYPI38255-RA	0.0143	354
ACYPI086795-RA	0.0144	354
ACYPI072190-RA	0.0149	354
ACYPI082860-RA	0.0224	354
ACYPI086295-RA	0.0249	354
ACYPI43396-RA	0.028	354
ACYPI070005-RA	0.0409	354
ACYPI24488-RA	0.0149	355
ACYPI062494-RA	0	356
ACYPI000397-RA	0	357
ACYPI002219-RA	0	357
ACYPI002403-RA	0	357
ACYPI005781-RA	0	357
ACYPI007733-RA	0	357
ACYPI008924-RA	0	357
ACYPI066800-RA	0	357
ACYPI068905-RA	0	357
ACYPI071618-RA	0	357
ACYPI072309-RA	0	357
ACYPI072409-RA	0	357
ACYPI081285-RA	0	357
ACYPI083031-RA	0	357
ACYPI083036-RA	0	357
ACYPI084508-RA	0	357
ACYPI084695-RA	0	357
ACYPI086312-RA	0	357
ACYPI086397-RA	0	357
ACYPI40610-RA	0	357
ACYPI43466-RA	0	357
ACYPI54896-RA	0	357
ACYPI088636-RA	0.0114	357
ACYPI086004-RA	0.0115	357
ACYPI065542-RA	0.0123	357
ACYPI33840-RA	0.0123	357
ACYPI55249-RA	0.0125	357
ACYPI006756-RA	0.0129	357
ACYPI41963-RA	0.0134	357
ACYPI066755-RA	0.0135	357
ACYPI007808-RA	0.0137	357
ACYPI37533-RA	0.0139	357
ACYPI085341-RA	0.014	357
ACYPI083456-RA	0.0142	357
ACYPI009236-RA	0.0147	357
ACYPI063145-RA	0.0246	357
ACYPI000091-RA	0.0247	357
ACYPI088068-RA	0.0289	357
ACYPI23643-RA	0.0388	357
ACYPI44435-RA	0.0128	358
ACYPI008219-RA	0.0134	358
ACYPI080217-RA	0.0266	359
ACYPI006161-RA	0	360
ACYPI008449-RA	0	360
ACYPI009940-RA	0	360
ACYPI061223-RA	0	360
ACYPI061356-RA	0	360
ACYPI061597-RA	0	360
ACYPI062256-RA	0	360
ACYPI062488-RA	0	360
ACYPI063815-RA	0	360
ACYPI068392-RA	0	360
ACYPI069604-RA	0	360
ACYPI069846-RA	0	360
ACYPI071836-RA	0	360
ACYPI073223-RA	0	360
ACYPI073575-RA	0	360
ACYPI080530-RA	0	360
ACYPI084913-RA	0	360
ACYPI085258-RA	0	360
ACYPI086022-RA	0	360
ACYPI086087-RA	0	360
ACYPI088276-RA	0	360
ACYPI088752-RA	0	360
ACYPI089046-RA	0	360
ACYPI20524-RA	0	360
ACYPI25341-RA	0	360
ACYPI27211-RA	0	360
ACYPI34210-RA	0	360
ACYPI36708-RA	0	360
ACYPI41125-RA	0	360
ACYPI46564-RA	0	360
ACYPI46674-RA	0	360
ACYPI069221-RA	0.0109	360
ACYPI42007-RA	0.011	360
ACYPI000036-RA	0.0131	360
ACYPI009132-RA	0.0139	360
ACYPI082244-RA	0.0155	360
ACYPI52366-RA	0.0256	360
ACYPI002465-RA	0.0372	360
ACYPI26709-RA	0	361
ACYPI45293-RA	0	361
ACYPI54630-RA	0	361
ACYPI067827-RA	0	362
ACYPI000240-RA	0	363
ACYPI004132-RA	0	363
ACYPI007971-RA	0	363
ACYPI008016-RA	0	363
ACYPI062890-RA	0	363
ACYPI063405-RA	0	363
ACYPI067734-RA	0	363
ACYPI071885-RA	0	363
ACYPI073839-RA	0	363
ACYPI080491-RA	0	363
ACYPI081086-RA	0	363
ACYPI082258-RA	0	363
ACYPI082530-RA	0	363
ACYPI083016-RA	0	363
ACYPI084685-RA	0	363
ACYPI085572-RA	0	363
ACYPI085651-RA	0	363
ACYPI086320-RA	0	363
ACYPI086846-RA	0	363
ACYPI086996-RA	0	363
ACYPI32440-RA	0	363
ACYPI32897-RA	0	363
ACYPI37875-RA	0	363
ACYPI38698-RA	0	363
ACYPI43583-RA	0	363
ACYPI50608-RA	0	363
ACYPI071851-RA	0.012	363
ACYPI082931-RA	0.012	363
ACYPI069292-RA	0.0127	363
ACYPI49485-RA	0.0127	363
ACYPI001098-RA	0.0137	363
ACYPI082750-RA	0.0138	363
ACYPI32273-RA	0.0139	363
ACYPI32223-RA	0.014	363
ACYPI086212-RA	0.0148	363
ACYPI084553-RA	0.016	363
ACYPI088381-RA	0.0205	363
ACYPI003695-RA	0.0223	363
ACYPI071126-RA	0.0252	363
ACYPI000035-RA	0.0255	363
ACYPI003003-RA	0.0386	363
ACYPI010104-RA	0	364
ACYPI082047-RA	0	364
ACYPI086063-RA	0	364
ACYPI000160-RA	0	366
ACYPI003026-RA	0	366
ACYPI003899-RA	0	366
ACYPI007715-RA	0	366
ACYPI061146-RA	0	366
ACYPI061498-RA	0	366
ACYPI061670-RA	0	366
ACYPI064251-RA	0	366
ACYPI066750-RA	0	366
ACYPI068841-RA	0	366
ACYPI068931-RA	0	366
ACYPI070175-RA	0	366
ACYPI072184-RA	0	366
ACYPI082105-RA	0	366
ACYPI084189-RA	0	366
ACYPI084255-RA	0	366
ACYPI085164-RA	0	366
ACYPI086021-RA	0	366
ACYPI089164-RA	0	366
ACYPI089239-RA	0	366
ACYPI21107-RA	0	366
ACYPI30523-RA	0	366
ACYPI32356-RA	0	366
ACYPI40925-RA	0	366
ACYPI42083-RA	0	366
ACYPI43310-RA	0	366
ACYPI50527-RA	0	366
ACYPI37864-RA	0.0122	366
ACYPI085165-RA	0.0124	366
ACYPI081063-RA	0.0129	366
ACYPI000072-RA	0.0136	366
ACYPI000034-RA	0.0138	366
ACYPI086533-RA	0.0138	366
ACYPI21579-RA	0.0225	366
ACYPI060199-RA	0.0388	366
ACYPI008891-RA	0	367
ACYPI20778-RA	0	367
ACYPI000082-RA	0	369
ACYPI000747-RA	0	369
ACYPI006030-RA	0	369
ACYPI008627-RA	0	369
ACYPI009429-RA	0	369
ACYPI061921-RA	0	369
ACYPI064335-RA	0	369
ACYPI065169-RA	0	369
ACYPI066040-RA	0	369
ACYPI067594-RA	0	369
ACYPI071368-RA	0	369
ACYPI071515-RA	0	369
ACYPI081892-RA	0	369
ACYPI082019-RA	0	369
ACYPI082804-RA	0	369
ACYPI083715-RA	0	369
ACYPI085553-RA	0	369
ACYPI087443-RA	0	369
ACYPI22102-RA	0	369
ACYPI36535-RA	0	369
ACYPI45823-RA	0	369
ACYPI50466-RA	0	369
ACYPI080708-RA	0.0102	369
ACYPI009512-RA	0.0127	369
ACYPI072456-RA	0.0129	369
ACYPI085550-RA	0.0142	369
ACYPI41107-RA	0.0143	369
ACYPI007152-RA	0.0242	369
ACYPI003941-RA	0.0261	369
ACYPI53158-RA	0.0268	369
ACYPI080270-RA	0.0286	369
ACYPI081420-RA	0	370
ACYPI001295-RA	0	372
ACYPI004745-RA	0	372
ACYPI006417-RA	0	372
ACYPI006618-RA	0	372
ACYPI008799-RA	0	372
ACYPI008956-RA	0	372
ACYPI009995-RA	0	372
ACYPI060132-RA	0	372
ACYPI062813-RA	0	372
ACYPI070050-RA	0	372
ACYPI070264-RA	0	372
ACYPI071814-RA	0	372
ACYPI080025-RA	0	372
ACYPI080064-RA	0	372
ACYPI080575-RA	0	372
ACYPI081002-RA	0	372
ACYPI081792-RA	0	372
ACYPI083996-RA	0	372
ACYPI086530-RA	0	372
ACYPI086889-RA	0	372
ACYPI087474-RA	0	372
ACYPI087587-RA	0	372
ACYPI087912-RA	0	372
ACYPI088120-RA	0	372
ACYPI088242-RA	0	372
ACYPI089059-RA	0	372
ACYPI24604-RA	0	372
ACYPI26623-RA	0	372
ACYPI27279-RA	0	372
ACYPI36092-RA	0	372
ACYPI37493-RA	0	372
ACYPI39610-RA	0	372
ACYPI47958-RA	0	372
ACYPI54347-RA	0	372
ACYPI082949-RA	0.011	372
ACYPI44286-RA	0.0114	372
ACYPI081044-RA	0.0119	372
ACYPI007207-RA	0.012	372
ACYPI063507-RA	0.0122	372
ACYPI072680-RA	0.0124	372
ACYPI004958-RA	0.0128	372
ACYPI089322-RA	0.0128	372
ACYPI082635-RA	0.0129	372
ACYPI000095-RA	0.0136	372
ACYPI31100-RA	0.0148	372
ACYPI087457-RA	0	373
ACYPI35334-RA	0	373
ACYPI000033-RA	0	375
ACYPI000293-RA	0	375
ACYPI002920-RA	0	375
ACYPI003451-RA	0	375
ACYPI006297-RA	0	375
ACYPI008918-RA	0	375
ACYPI009899-RA	0	375
ACYPI064110-RA	0	375
ACYPI064223-RA	0	375
ACYPI064929-RA	0	375
ACYPI065355-RA	0	375
ACYPI065713-RA	0	375
ACYPI066561-RA	0	375
ACYPI072367-RA	0	375
ACYPI072598-RA	0	375
ACYPI080396-RA	0	375
ACYPI081658-RA	0	375
ACYPI082503-RA	0	375
ACYPI083398-RA	0	375
ACYPI084461-RA	0	375
ACYPI085345-RA	0	375
ACYPI085359-RA	0	375
ACYPI087898-RA	0	375
ACYPI22027-RA	0	375
ACYPI22506-RA	0	375
ACYPI26400-RA	0	375
ACYPI28598-RA	0	375
ACYPI30341-RA	0	375
ACYPI31152-RA	0	375
ACYPI34739-RA	0	375
ACYPI41289-RA	0	375
ACYPI53903-RA	0	375
ACYPI068268-RA	0.0098	375
ACYPI072660-RA	0.0116	375
ACYPI37602-RA	0.012	375
ACYPI52415-RA	0.0123	375
ACYPI002549-RA	0.0124	375
ACYPI004831-RA	0.0129	375
ACYPI080145-RA	0.0136	375
ACYPI009400-RA	0.0141	375
ACYPI004139-RA	0.0248	375
ACYPI088541-RA	0.0323	375
ACYPI21885-RA	0.042	375
ACYPI062904-RA	0.0431	375
ACYPI001201-RA	0	376
ACYPI003315-RA	0	376
ACYPI067875-RA	0	376
ACYPI080995-RA	0	376
ACYPI082211-RA	0	376
ACYPI063117-RA	0.013	376
ACYPI088582-RA	0	377
ACYPI004069-RA	0	378
ACYPI004974-RA	0	378
ACYPI009734-RA	0	378
ACYPI062151-RA	0	378
ACYPI066286-RA	0	378
ACYPI066778-RA	0	378
ACYPI070448-RA	0	378
ACYPI072851-RA	0	378
ACYPI080715-RA	0	378
ACYPI080866-RA	0	378
ACYPI080926-RA	0	378
ACYPI082612-RA	0	378
ACYPI083462-RA	0	378
ACYPI086628-RA	0	378
ACYPI087623-RA	0	378
ACYPI089106-RA	0	378
ACYPI45335-RA	0	378
ACYPI49287-RA	0	378
ACYPI49841-RA	0	378
ACYPI53178-RA	0	378
ACYPI52600-RA	0.0117	378
ACYPI007440-RA	0.012	378
ACYPI002727-RA	0.0122	378
ACYPI061402-RA	0.0123	378
ACYPI54557-RA	0.0123	378
ACYPI36345-RA	0.0124	378
ACYPI065960-RA	0.0142	378
ACYPI080946-RA	0.0239	378
ACYPI25987-RA	0.0258	378
ACYPI46913-RA	0.0258	378
ACYPI20610-RA	0.0263	378
ACYPI088942-RA	0.0562	378
ACYPI005820-RA	0	379
ACYPI089031-RA	0	379
ACYPI072955-RA	0.0132	379
ACYPI000283-RA	0	381
ACYPI001655-RA	0	381
ACYPI001800-RA	0	381
ACYPI002150-RA	0	381
ACYPI006120-RA	0	381
ACYPI009516-RA	0	381
ACYPI009700-RA	0	381
ACYPI069917-RA	0	381
ACYPI070479-RA	0	381
ACYPI071417-RA	0	381
ACYPI072312-RA	0	381
ACYPI081219-RA	0	381
ACYPI082587-RA	0	381
ACYPI083236-RA	0	381
ACYPI084077-RA	0	381
ACYPI085533-RA	0	381
ACYPI085544-RA	0	381
ACYPI086973-RA	0	381
ACYPI087791-RA	0	381
ACYPI22347-RA	0	381
ACYPI25091-RA	0	381
ACYPI27238-RA	0	381
ACYPI29450-RA	0	381
ACYPI32062-RA	0	381
ACYPI34035-RA	0	381
ACYPI41039-RA	0	381
ACYPI46728-RA	0	381
ACYPI55695-RA	0	381
ACYPI087629-RA	0.0095	381
ACYPI072444-RA	0.0107	381
ACYPI065989-RA	0.0109	381
ACYPI061159-RA	0.011	381
ACYPI068501-RA	0.0115	381
ACYPI006088-RA	0.0116	381
ACYPI005082-RA	0.0119	381
ACYPI086730-RA	0.012	381
ACYPI35881-RA	0.0122	381
ACYPI008778-RA	0.0124	381
ACYPI41545-RA	0.0225	381
ACYPI071930-RA	0.0323	381
ACYPI55537-RA	0.0407	381
ACYPI089514-RA	0.0521	381
ACYPI072571-RA	0	382
ACYPI002963-RA	0	382
ACYPI005269-RA	0	382
ACYPI005677-RA	0	383
ACYPI004138-RA	0	384
ACYPI004999-RA	0	384
ACYPI005090-RA	0	384
ACYPI006859-RA	0	384
ACYPI009176-RA	0	384
ACYPI062388-RA	0	384
ACYPI063386-RA	0	384
ACYPI064046-RA	0	384
ACYPI064084-RA	0	384
ACYPI068511-RA	0	384
ACYPI071903-RA	0	384
ACYPI072068-RA	0	384
ACYPI073711-RA	0	384
ACYPI081593-RA	0	384
ACYPI082152-RA	0	384
ACYPI082665-RA	0	384
ACYPI082682-RA	0	384
ACYPI082948-RA	0	384
ACYPI085095-RA	0	384
ACYPI085384-RA	0	384
ACYPI086250-RA	0	384
ACYPI088703-RA	0	384
ACYPI43381-RA	0	384
ACYPI45716-RA	0	384
ACYPI56502-RA	0	384
ACYPI080517-RA	0.0093	384
ACYPI081356-RA	0.0096	384
ACYPI082430-RA	0.0099	384
ACYPI008397-RA	0.011	384
ACYPI37007-RA	0.0118	384
ACYPI006832-RA	0.0126	384
ACYPI52132-RA	0.0128	384
ACYPI062459-RA	0.0131	384
ACYPI44316-RA	0.0255	384
ACYPI082353-RA	0.0304	384
ACYPI069535-RA	0.0435	384
ACYPI061446-RA	0	385
ACYPI27931-RA	0	385
ACYPI48120-RA	0	385
ACYPI087664-RA	0.0124	386
ACYPI000426-RA	0	387
ACYPI001324-RA	0	387
ACYPI001466-RA	0	387
ACYPI005340-RA	0	387
ACYPI006095-RA	0	387
ACYPI006534-RA	0	387
ACYPI009354-RA	0	387
ACYPI009585-RA	0	387
ACYPI066932-RA	0	387
ACYPI068076-RA	0	387
ACYPI069117-RA	0	387
ACYPI080109-RA	0	387
ACYPI082228-RA	0	387
ACYPI084307-RA	0	387
ACYPI47156-RA	0	387
ACYPI50934-RA	0	387
ACYPI52562-RA	0	387
ACYPI53288-RA	0	387
ACYPI086517-RA	0.0106	387
ACYPI073126-RA	0.0112	387
ACYPI56566-RA	0.0115	387
ACYPI010196-RA	0.0118	387
ACYPI56564-RA	0.0119	387
ACYPI006841-RA	0.0135	387
ACYPI068044-RA	0.0269	387
ACYPI002182-RA	0.0354	387
ACYPI21038-RA	0.0136	388
ACYPI004802-RA	0	389
ACYPI064637-RA	0.0131	389
ACYPI000300-RA	0	390
ACYPI001499-RA	0	390
ACYPI001520-RA	0	390
ACYPI002767-RA	0	390
ACYPI009829-RA	0	390
ACYPI060606-RA	0	390
ACYPI060743-RA	0	390
ACYPI062265-RA	0	390
ACYPI065360-RA	0	390
ACYPI070598-RA	0	390
ACYPI071351-RA	0	390
ACYPI072798-RA	0	390
ACYPI080907-RA	0	390
ACYPI083408-RA	0	390
ACYPI084430-RA	0	390
ACYPI088117-RA	0	390
ACYPI088623-RA	0	390
ACYPI089076-RA	0	390
ACYPI40655-RA	0	390
ACYPI43397-RA	0	390
ACYPI44058-RA	0	390
ACYPI47374-RA	0	390
ACYPI53843-RA	0	390
ACYPI55078-RA	0	390
ACYPI064507-RA	0.0105	390
ACYPI080736-RA	0.0109	390
ACYPI080382-RA	0.0117	390
ACYPI089557-RA	0.0119	390
ACYPI082117-RA	0.0129	390
ACYPI23349-RA	0.035	390
ACYPI32323-RA	0.0392	390
ACYPI002637-RA	0.0705	390
ACYPI005362-RA	0	391
ACYPI31202-RA	0	391
ACYPI56460-RA	0.01	391
ACYPI001452-RA	0.0121	391
ACYPI080865-RA	0	392
ACYPI081164-RA	0	392
ACYPI000073-RA	0	393
ACYPI005312-RA	0	393
ACYPI005992-RA	0	393
ACYPI006036-RA	0	393
ACYPI006559-RA	0	393
ACYPI008873-RA	0	393
ACYPI009116-RA	0	393
ACYPI062585-RA	0	393
ACYPI071089-RA	0	393
ACYPI080543-RA	0	393
ACYPI080583-RA	0	393
ACYPI082065-RA	0	393
ACYPI083800-RA	0	393
ACYPI084614-RA	0	393
ACYPI086204-RA	0	393
ACYPI087157-RA	0	393
ACYPI20661-RA	0	393
ACYPI20803-RA	0	393
ACYPI43505-RA	0	393
ACYPI47395-RA	0	393
ACYPI080282-RA	0.0095	393
ACYPI089499-RA	0.0104	393
ACYPI005907-RA	0.0111	393
ACYPI072130-RA	0.0117	393
ACYPI28785-RA	0.0117	393
ACYPI000930-RA	0.0118	393
ACYPI073025-RA	0.0121	393
ACYPI000847-RA	0.0126	393
ACYPI000096-RA	0.0128	393
ACYPI061226-RA	0.0165	393
ACYPI50337-RA	0.0194	393
ACYPI55112-RA	0.02	393
ACYPI45210-RA	0.0226	393
ACYPI088326-RA	0.0228	393
ACYPI42068-RA	0.0313	393
ACYPI54906-RA	0.0377	393
ACYPI085175-RA	0	394
ACYPI35178-RA	0	394
ACYPI002435-RA	0	396
ACYPI003494-RA	0	396
ACYPI005308-RA	0	396
ACYPI064727-RA	0	396
ACYPI069314-RA	0	396
ACYPI080492-RA	0	396
ACYPI080511-RA	0	396
ACYPI081320-RA	0	396
ACYPI081483-RA	0	396
ACYPI082598-RA	0	396
ACYPI082865-RA	0	396
ACYPI083725-RA	0	396
ACYPI084964-RA	0	396
ACYPI085053-RA	0	396
ACYPI085071-RA	0	396
ACYPI085696-RA	0	396
ACYPI085771-RA	0	396
ACYPI087173-RA	0	396
ACYPI089313-RA	0	396
ACYPI21843-RA	0	396
ACYPI27259-RA	0	396
ACYPI27697-RA	0	396
ACYPI33497-RA	0	396
ACYPI35918-RA	0	396
ACYPI38042-RA	0	396
ACYPI084145-RA	0.0094	396
ACYPI005328-RA	0.0104	396
ACYPI081727-RA	0.0117	396
ACYPI006769-RA	0.0118	396
ACYPI062573-RA	0.012	396
ACYPI083967-RA	0.012	396
ACYPI29568-RA	0.0125	396
ACYPI51807-RA	0.0128	396
ACYPI072181-RA	0.0134	396
ACYPI52815-RA	0.0138	396
ACYPI085875-RA	0.022	396
ACYPI004227-RA	0.0222	396
ACYPI080681-RA	0.0223	396
ACYPI002629-RA	0.0239	396
ACYPI083452-RA	0.0241	396
ACYPI081373-RA	0.0247	396
ACYPI32658-RA	0.0277	396
ACYPI004798-RA	0	397
ACYPI22187-RA	0	397
ACYPI39145-RA	0	397
ACYPI45001-RA	0.0064	397
ACYPI080648-RA	0	397
ACYPI000372-RA	0	399
ACYPI000630-RA	0	399
ACYPI002634-RA	0	399
ACYPI003229-RA	0	399
ACYPI006481-RA	0	399
ACYPI008299-RA	0	399
ACYPI009643-RA	0	399
ACYPI060735-RA	0	399
ACYPI065067-RA	0	399
ACYPI067506-RA	0	399
ACYPI068650-RA	0	399
ACYPI071033-RA	0	399
ACYPI080841-RA	0	399
ACYPI085278-RA	0	399
ACYPI086513-RA	0	399
ACYPI22532-RA	0	399
ACYPI25932-RA	0	399
ACYPI29703-RA	0	399
ACYPI39568-RA	0	399
ACYPI43320-RA	0	399
ACYPI51921-RA	0	399
ACYPI55520-RA	0	399
ACYPI005270-RA	0.0116	399
ACYPI28073-RA	0.0128	399
ACYPI006245-RA	0.0132	399
ACYPI009869-RA	0.0261	399
ACYPI52436-RA	0.0332	399
ACYPI088869-RA	0.0393	399
ACYPI29907-RA	0.0423	399
ACYPI008795-RA	0	400
ACYPI003438-RA	0	402
ACYPI010222-RA	0	402
ACYPI060960-RA	0	402
ACYPI061417-RA	0	402
ACYPI067992-RA	0	402
ACYPI069339-RA	0	402
ACYPI072701-RA	0	402
ACYPI081160-RA	0	402
ACYPI081853-RA	0	402
ACYPI082641-RA	0	402
ACYPI083177-RA	0	402
ACYPI084246-RA	0	402
ACYPI084826-RA	0	402
ACYPI085994-RA	0	402
ACYPI087481-RA	0	402
ACYPI23143-RA	0	402
ACYPI25611-RA	0	402
ACYPI33250-RA	0	402
ACYPI37313-RA	0	402
ACYPI44516-RA	0	402
ACYPI44617-RA	0	402
ACYPI51520-RA	0	402
ACYPI009803-RA	0.0118	402
ACYPI065009-RA	0.0119	402
ACYPI000074-RA	0.012	402
ACYPI081736-RA	0.0226	402
ACYPI45148-RA	0.0254	402
ACYPI008105-RA	0.0121	403
ACYPI000032-RA	0	405
ACYPI000470-RA	0	405
ACYPI004788-RA	0	405
ACYPI005707-RA	0	405
ACYPI009454-RA	0	405
ACYPI060069-RA	0	405
ACYPI060546-RA	0	405
ACYPI061441-RA	0	405
ACYPI061629-RA	0	405
ACYPI061650-RA	0	405
ACYPI065131-RA	0	405
ACYPI067116-RA	0	405
ACYPI067410-RA	0	405
ACYPI068262-RA	0	405
ACYPI070718-RA	0	405
ACYPI071884-RA	0	405
ACYPI071922-RA	0	405
ACYPI080933-RA	0	405
ACYPI085952-RA	0	405
ACYPI086383-RA	0	405
ACYPI20668-RA	0	405
ACYPI22855-RA	0	405
ACYPI36529-RA	0	405
ACYPI38761-RA	0	405
ACYPI41640-RA	0	405
ACYPI44518-RA	0	405
ACYPI45779-RA	0	405
ACYPI45910-RA	0	405
ACYPI51795-RA	0	405
ACYPI55067-RA	0	405
ACYPI082079-RA	0.0102	405
ACYPI005126-RA	0.0117	405
ACYPI086018-RA	0.0117	405
ACYPI002879-RA	0.0118	405
ACYPI25197-RA	0.0118	405
ACYPI004221-RA	0.0132	405
ACYPI43360-RA	0.0136	405
ACYPI080569-RA	0.0192	405
ACYPI002809-RA	0.0212	405
ACYPI060526-RA	0.0216	405
ACYPI21157-RA	0.0332	405
ACYPI24467-RA	0.0339	405
ACYPI067579-RA	0.0346	405
ACYPI009011-RA	0	406
ACYPI009248-RA	0	406
ACYPI39042-RA	0	406
ACYPI000085-RA	0	408
ACYPI000772-RA	0	408
ACYPI002436-RA	0	408
ACYPI007411-RA	0	408
ACYPI008309-RA	0	408
ACYPI008400-RA	0	408
ACYPI009006-RA	0	408
ACYPI061058-RA	0	408
ACYPI061862-RA	0	408
ACYPI065660-RA	0	408
ACYPI067629-RA	0	408
ACYPI072126-RA	0	408
ACYPI080676-RA	0	408
ACYPI082897-RA	0	408
ACYPI083271-RA	0	408
ACYPI084483-RA	0	408
ACYPI085236-RA	0	408
ACYPI085787-RA	0	408
ACYPI085878-RA	0	408
ACYPI087752-RA	0	408
ACYPI089484-RA	0	408
ACYPI089537-RA	0	408
ACYPI32838-RA	0	408
ACYPI32849-RA	0	408
ACYPI36669-RA	0	408
ACYPI44695-RA	0	408
ACYPI46739-RA	0	408
ACYPI47829-RA	0	408
ACYPI53856-RA	0	408
ACYPI54660-RA	0	408
ACYPI56309-RA	0	408
ACYPI56704-RA	0	408
ACYPI28188-RA	0.006	408
ACYPI33953-RA	0.0095	408
ACYPI55868-RA	0.0097	408
ACYPI40895-RA	0.011	408
ACYPI087603-RA	0.0127	408
ACYPI062598-RA	0.023	408
ACYPI067194-RA	0.0246	408
ACYPI085730-RA	0.026	408
ACYPI39278-RA	0.0339	408
ACYPI071629-RA	0.0374	408
ACYPI007927-RA	0.0473	408
ACYPI008743-RA	0	409
ACYPI35283-RA	0	409
ACYPI39599-RA	0	409
ACYPI42095-RA	0	409
ACYPI006909-RA	0.0106	409
ACYPI080385-RA	0.0117	409
ACYPI001093-RA	0.0124	409
ACYPI001350-RA	0	411
ACYPI001774-RA	0	411
ACYPI002998-RA	0	411
ACYPI003151-RA	0	411
ACYPI007105-RA	0	411
ACYPI007219-RA	0	411
ACYPI008742-RA	0	411
ACYPI061821-RA	0	411
ACYPI062398-RA	0	411
ACYPI063280-RA	0	411
ACYPI064037-RA	0	411
ACYPI064087-RA	0	411
ACYPI067001-RA	0	411
ACYPI069178-RA	0	411
ACYPI073066-RA	0	411
ACYPI080647-RA	0	411
ACYPI080856-RA	0	411
ACYPI081028-RA	0	411
ACYPI082259-RA	0	411
ACYPI082725-RA	0	411
ACYPI082909-RA	0	411
ACYPI083645-RA	0	411
ACYPI085174-RA	0	411
ACYPI085239-RA	0	411
ACYPI085804-RA	0	411
ACYPI085816-RA	0	411
ACYPI086682-RA	0	411
ACYPI22504-RA	0	411
ACYPI33702-RA	0	411
ACYPI41100-RA	0	411
ACYPI088389-RA	0.0094	411
ACYPI084082-RA	0.0102	411
ACYPI29337-RA	0.0112	411
ACYPI40990-RA	0.0112	411
ACYPI000031-RA	0.012	411
ACYPI063305-RA	0.012	411
ACYPI009073-RA	0.0132	411
ACYPI000417-RA	0.0136	411
ACYPI003503-RA	0.0193	411
ACYPI008871-RA	0.0358	411
ACYPI000946-RA	0	414
ACYPI003660-RA	0	414
ACYPI004764-RA	0	414
ACYPI060573-RA	0	414
ACYPI065157-RA	0	414
ACYPI066891-RA	0	414
ACYPI072024-RA	0	414
ACYPI073502-RA	0	414
ACYPI080649-RA	0	414
ACYPI082413-RA	0	414
ACYPI082475-RA	0	414
ACYPI082921-RA	0	414
ACYPI084120-RA	0	414
ACYPI084368-RA	0	414
ACYPI086743-RA	0	414
ACYPI087606-RA	0	414
ACYPI088783-RA	0	414
ACYPI24491-RA	0	414
ACYPI26700-RA	0	414
ACYPI32561-RA	0	414
ACYPI33389-RA	0	414
ACYPI33772-RA	0	414
ACYPI34342-RA	0	414
ACYPI48537-RA	0	414
ACYPI56584-RA	0	414
ACYPI088852-RA	0.0039	414
ACYPI007334-RA	0.0104	414
ACYPI000682-RA	0.0112	414
ACYPI37982-RA	0.0117	414
ACYPI56307-RA	0.0117	414
ACYPI28507-RA	0.0123	414
ACYPI005265-RA	0.0221	414
ACYPI081246-RA	0.0239	414
ACYPI34988-RA	0.0248	414
ACYPI42531-RA	0.0251	414
ACYPI005874-RA	0	415
ACYPI084234-RA	0	415
ACYPI087104-RA	0.0119	415
ACYPI088553-RA	0.0136	415
ACYPI063000-RA	0	415
ACYPI002385-RA	0	417
ACYPI005373-RA	0	417
ACYPI006244-RA	0	417
ACYPI006651-RA	0	417
ACYPI062468-RA	0	417
ACYPI065105-RA	0	417
ACYPI071161-RA	0	417
ACYPI072169-RA	0	417
ACYPI073243-RA	0	417
ACYPI073555-RA	0	417
ACYPI082900-RA	0	417
ACYPI084207-RA	0	417
ACYPI085678-RA	0	417
ACYPI085827-RA	0	417
ACYPI087155-RA	0	417
ACYPI088843-RA	0	417
ACYPI21274-RA	0	417
ACYPI32518-RA	0	417
ACYPI37183-RA	0	417
ACYPI41442-RA	0	417
ACYPI54956-RA	0	417
ACYPI23885-RA	0.0096	417
ACYPI086253-RA	0.0104	417
ACYPI33832-RA	0.0106	417
ACYPI080486-RA	0.011	417
ACYPI48582-RA	0.0112	417
ACYPI007165-RA	0.0117	417
ACYPI43138-RA	0.0117	417
ACYPI066704-RA	0.0121	417
ACYPI007432-RA	0.0122	417
ACYPI005696-RA	0.0215	417
ACYPI072071-RA	0.0223	417
ACYPI009559-RA	0.0229	417
ACYPI007090-RA	0.0259	417
ACYPI005037-RA	0.0293	417
ACYPI001610-RA	0.0309	417
ACYPI001055-RA	0	418
ACYPI085375-RA	0	418
ACYPI30506-RA	0.0361	418
ACYPI33816-RA	0	419
ACYPI005516-RA	0	420
ACYPI065261-RA	0	420
ACYPI065576-RA	0	420
ACYPI066949-RA	0	420
ACYPI072245-RA	0	420
ACYPI072637-RA	0	420
ACYPI073831-RA	0	420
ACYPI082255-RA	0	420
ACYPI083368-RA	0	420
ACYPI084225-RA	0	420
ACYPI084230-RA	0	420
ACYPI085010-RA	0	420
ACYPI085334-RA	0	420
ACYPI085401-RA	0	420
ACYPI086410-RA	0	420
ACYPI087177-RA	0	420
ACYPI087577-RA	0	420
ACYPI088941-RA	0	420
ACYPI20130-RA	0	420
ACYPI24880-RA	0	420
ACYPI41781-RA	0	420
ACYPI47310-RA	0	420
ACYPI51139-RA	0	420
ACYPI51636-RA	0	420
ACYPI52441-RA	0	420
ACYPI54992-RA	0	420
ACYPI009639-RA	0.0099	420
ACYPI44989-RA	0.0111	420
ACYPI25388-RA	0.0115	420
ACYPI001115-RA	0.0117	420
ACYPI42811-RA	0.0117	420
ACYPI085030-RA	0.0129	420
ACYPI009308-RA	0.013	420
ACYPI087365-RA	0.0181	420
ACYPI067519-RA	0.0215	420
ACYPI060755-RA	0.022	420
ACYPI31698-RA	0.022	420
ACYPI069388-RA	0.0236	420
ACYPI081481-RA	0.0631	420
ACYPI005587-RA	0	421
ACYPI54458-RA	0.0112	421
ACYPI000482-RA	0	423
ACYPI001134-RA	0	423
ACYPI004636-RA	0	423
ACYPI005387-RA	0	423
ACYPI007078-RA	0	423
ACYPI061461-RA	0	423
ACYPI063584-RA	0	423
ACYPI064865-RA	0	423
ACYPI066859-RA	0	423
ACYPI070582-RA	0	423
ACYPI071143-RA	0	423
ACYPI071493-RA	0	423
ACYPI080971-RA	0	423
ACYPI085641-RA	0	423
ACYPI086802-RA	0	423
ACYPI087442-RA	0	423
ACYPI087679-RA	0	423
ACYPI25997-RA	0	423
ACYPI26193-RA	0	423
ACYPI26465-RA	0	423
ACYPI34532-RA	0	423
ACYPI28503-RA	0.0084	423
ACYPI000455-RA	0.01	423
ACYPI069348-RA	0.0102	423
ACYPI24281-RA	0.0103	423
ACYPI54307-RA	0.0112	423
ACYPI008012-RA	0.0116	423
ACYPI071325-RA	0.0117	423
ACYPI24161-RA	0.0117	423
ACYPI40638-RA	0.0118	423
ACYPI34474-RA	0.0178	423
ACYPI009416-RA	0.0229	423
ACYPI010178-RA	0.0245	423
ACYPI082543-RA	0	424
ACYPI006346-RA	0.0116	424
ACYPI35638-RA	0.0218	424
ACYPI080450-RA	0	425
ACYPI000030-RA	0	426
ACYPI002945-RA	0	426
ACYPI003048-RA	0	426
ACYPI005523-RA	0	426
ACYPI005933-RA	0	426
ACYPI007094-RA	0	426
ACYPI064010-RA	0	426
ACYPI064098-RA	0	426
ACYPI064285-RA	0	426
ACYPI065033-RA	0	426
ACYPI067602-RA	0	426
ACYPI068944-RA	0	426
ACYPI069948-RA	0	426
ACYPI080284-RA	0	426
ACYPI081212-RA	0	426
ACYPI081402-RA	0	426
ACYPI082712-RA	0	426
ACYPI085917-RA	0	426
ACYPI086902-RA	0	426
ACYPI087042-RA	0	426
ACYPI087449-RA	0	426
ACYPI088044-RA	0	426
ACYPI088183-RA	0	426
ACYPI22953-RA	0	426
ACYPI30018-RA	0	426
ACYPI31880-RA	0	426
ACYPI35197-RA	0	426
ACYPI41981-RA	0	426
ACYPI006342-RA	0.011	426
ACYPI37729-RA	0.0111	426
ACYPI068447-RA	0.0113	426
ACYPI20451-RA	0.0114	426
ACYPI088328-RA	0.0116	426
ACYPI088750-RA	0.0119	426
ACYPI54733-RA	0.0122	426
ACYPI007810-RA	0.0253	426
ACYPI20519-RA	0.0267	426
ACYPI072134-RA	0.045	426
ACYPI082876-RA	0	427
ACYPI33577-RA	0	427
ACYPI002848-RA	0	429
ACYPI007521-RA	0	429
ACYPI008572-RA	0	429
ACYPI009921-RA	0	429
ACYPI061686-RA	0	429
ACYPI062697-RA	0	429
ACYPI065305-RA	0	429
ACYPI066636-RA	0	429
ACYPI067331-RA	0	429
ACYPI067457-RA	0	429
ACYPI068534-RA	0	429
ACYPI068896-RA	0	429
ACYPI083095-RA	0	429
ACYPI084918-RA	0	429
ACYPI085178-RA	0	429
ACYPI085955-RA	0	429
ACYPI087352-RA	0	429
ACYPI23849-RA	0	429
ACYPI29744-RA	0	429
ACYPI38746-RA	0	429
ACYPI38984-RA	0	429
ACYPI56745-RA	0	429
ACYPI39441-RA	0.0094	429
ACYPI080405-RA	0.0096	429
ACYPI085297-RA	0.0096	429
ACYPI23364-RA	0.0097	429
ACYPI068415-RA	0.0101	429
ACYPI003461-RA	0.0102	429
ACYPI003752-RA	0.0102	429
ACYPI20496-RA	0.0107	429
ACYPI003254-RA	0.0113	429
ACYPI38758-RA	0.0118	429
ACYPI20033-RA	0.0119	429
ACYPI006109-RA	0.0122	429
ACYPI28084-RA	0.013	429
ACYPI071444-RA	0.0207	429
ACYPI38827-RA	0.0216	429
ACYPI072808-RA	0.024	429
ACYPI063374-RA	0.0245	429
ACYPI51484-RA	0	430
ACYPI23964-RA	0.0182	430
ACYPI29474-RA	0.0217	430
ACYPI000183-RA	0	432
ACYPI000819-RA	0	432
ACYPI002245-RA	0	432
ACYPI003023-RA	0	432
ACYPI004223-RA	0	432
ACYPI006539-RA	0	432
ACYPI007795-RA	0	432
ACYPI009919-RA	0	432
ACYPI063228-RA	0	432
ACYPI063390-RA	0	432
ACYPI067236-RA	0	432
ACYPI067650-RA	0	432
ACYPI067777-RA	0	432
ACYPI071834-RA	0	432
ACYPI080949-RA	0	432
ACYPI081169-RA	0	432
ACYPI083037-RA	0	432
ACYPI083044-RA	0	432
ACYPI088680-RA	0	432
ACYPI089033-RA	0	432
ACYPI22195-RA	0	432
ACYPI26489-RA	0	432
ACYPI26776-RA	0	432
ACYPI28552-RA	0	432
ACYPI31683-RA	0	432
ACYPI32700-RA	0	432
ACYPI39026-RA	0	432
ACYPI39154-RA	0	432
ACYPI39346-RA	0	432
ACYPI42759-RA	0	432
ACYPI50552-RA	0	432
ACYPI51936-RA	0	432
ACYPI067090-RA	0.0087	432
ACYPI070322-RA	0.0101	432
ACYPI007680-RA	0.0104	432
ACYPI086010-RA	0.0104	432
ACYPI008629-RA	0.0106	432
ACYPI062544-RA	0.0106	432
ACYPI086127-RA	0.0112	432
ACYPI54901-RA	0.0113	432
ACYPI089032-RA	0.0114	432
ACYPI55892-RA	0.0115	432
ACYPI26318-RA	0.0118	432
ACYPI004892-RA	0.0132	432
ACYPI060632-RA	0.0198	432
ACYPI086913-RA	0.02	432
ACYPI21817-RA	0.0232	432
ACYPI29043-RA	0.0313	432
ACYPI48492-RA	0.032	432
ACYPI006652-RA	0	433
ACYPI38332-RA	0	433
ACYPI50555-RA	0	433
ACYPI004552-RA	0	435
ACYPI005101-RA	0	435
ACYPI006206-RA	0	435
ACYPI006208-RA	0	435
ACYPI006947-RA	0	435
ACYPI010032-RA	0	435
ACYPI060775-RA	0	435
ACYPI060973-RA	0	435
ACYPI062273-RA	0	435
ACYPI072862-RA	0	435
ACYPI081830-RA	0	435
ACYPI082056-RA	0	435
ACYPI084668-RA	0	435
ACYPI084854-RA	0	435
ACYPI085436-RA	0	435
ACYPI087272-RA	0	435
ACYPI087882-RA	0	435
ACYPI088038-RA	0	435
ACYPI23183-RA	0	435
ACYPI23903-RA	0	435
ACYPI29368-RA	0	435
ACYPI33978-RA	0	435
ACYPI40817-RA	0	435
ACYPI48082-RA	0	435
ACYPI080371-RA	0.0087	435
ACYPI38630-RA	0.0087	435
ACYPI062343-RA	0.0094	435
ACYPI068553-RA	0.0094	435
ACYPI086694-RA	0.0106	435
ACYPI009540-RA	0.0108	435
ACYPI49273-RA	0.0108	435
ACYPI009876-RA	0.011	435
ACYPI46684-RA	0.0112	435
ACYPI001632-RA	0.0115	435
ACYPI073864-RA	0.0115	435
ACYPI008398-RA	0.0119	435
ACYPI083329-RA	0.0191	435
ACYPI002493-RA	0.0197	435
ACYPI38480-RA	0.0207	435
ACYPI089475-RA	0.0318	435
ACYPI071244-RA	0.0367	435
ACYPI44180-RA	0.0582	435
ACYPI070413-RA	0	436
ACYPI001924-RA	0.0098	436
ACYPI060217-RA	0	437
ACYPI001262-RA	0	438
ACYPI001455-RA	0	438
ACYPI005995-RA	0	438
ACYPI007329-RA	0	438
ACYPI061325-RA	0	438
ACYPI063710-RA	0	438
ACYPI064012-RA	0	438
ACYPI065011-RA	0	438
ACYPI072213-RA	0	438
ACYPI081861-RA	0	438
ACYPI082330-RA	0	438
ACYPI089266-RA	0	438
ACYPI24720-RA	0	438
ACYPI26035-RA	0	438
ACYPI29993-RA	0	438
ACYPI40679-RA	0	438
ACYPI43223-RA	0	438
ACYPI52944-RA	0	438
ACYPI56506-RA	0	438
ACYPI086231-RA	0.0099	438
ACYPI081823-RA	0.0104	438
ACYPI003652-RA	0.0109	438
ACYPI067622-RA	0.0109	438
ACYPI003005-RA	0.0111	438
ACYPI064052-RA	0.0115	438
ACYPI31538-RA	0.0199	438
ACYPI35229-RA	0.0211	438
ACYPI069962-RA	0.0214	438
ACYPI000097-RA	0.0219	438
ACYPI008117-RA	0.0238	438
ACYPI46340-RA	0	439
ACYPI20477-RA	0.0107	439
[truncated: 14,369 more rows]
