# Supplementary material for: A large genomic insertion containing a duplicated follistatin gene is linked to the pea aphid male wing dimorphism
Source: eLife. 2020 Mar 6;9:e50608. doi: 10.7554/eLife.50608 (PMC7060042; doi:10.7554/eLife.50608)
Supplement: Supplementary file 1. [file elife-50608-supp1.xlsx]

## Sheet: Sheet1
Supplementary file 1: ORFs inside and directly outside of the api region.
ORFs inside or partially inside of the genetically defined api region:
GeneID (Fig. 2a)	ACYPI ID; Genbank ID (if available)	Inside or outside insertion	Top conserved domain (top evalue) by blastx	TE* blastn (top evalue)	Summary description
g1	ACYPI26739; none	Inside	THAP domain (1.08e-11)	Other TE repeat (3e-119)	Repetitive in pea aphid genome; contains TE domain
g2	ACYPI083249; none	Inside	-	LTRuncomp (5e-111)	Repetitive in pea aphid genome, LTR like TE
g3	g3	Inside	Reverse transcriptase in retrotransposons (RT_pepA17)	Polinton (2e-111)	Repetitive in pea aphid genome, contains transposon domain
g4	g4	Inside	Integrase core domain (5.10e-07)	Polinton (0.0)	Repetitive in pea aphid genome, contains transposon domain
g5	g5	Inside	GT1 superfamily (6.12e-03)	Other TE repeat (6e-23)	Repetitive in pea aphid genome, uncharacterized TE
g6	g6	Inside	DDE_Tnp4 superfamily domain (7.15e-03)	-	Repetitive amino acid sequence in the pea aphid genome, possible uncharacterized TE
g7	g7	Inside	DDE_Tnp4 superfamily domain (3.02e-07)	Other TE repeat (2e-68)	Repetitive in pea aphid genome, uncharacterized TE
g8	g8	Inside	-	Other TE repeat (1e-94)	Repetitive in pea aphid genome, uncharacterized TE
fs-3	ACYPI065759; none	Inside	Kazal type serine protease inhibitors and follistatin-like domains (9.17e-08)	-	Follistatin paralog
g9	g9	Inside	Non-LTR retrotransposon and non-LTR retrovirus reverse transcriptase (1.22e-07)	Other TE repeat (0.0)	Repetitive in pea aphid genome, non-LTR like element
g10	ACYPI25528; none	Inside	Mitochondrial ribosomal protein (1.37e-05)	TIRuncomp (0.0)	Repetitive in pea aphid genome, TE with terminal inverted repeats (TIRs)
g11	ACYPI088860; XM_029485650	Inside	Prefoldin subunit (7.01e-03)	Other TE repeat (0.0)	Repetitive in pea aphid genome, uncharacterized TE
as1	ACYPI25525; XM_008182694	Outside	-	-	Unique gene in pea aphid genome, unknown function
sam50	ACYPI002281; XM_001948567	Outside	Outer membrane protein assembly factor BamA (3.35e-18)	-	Unique gene in pea aphid genome, possible mitochondrial sorting and assembly gene
as2	ACYPI25530; XM_016802697	Outside	-	-	Unique gene in pea aphid genome, unknown function
frs2	ACYPI25532; XM_003243063	Outside	Fibroblast growth factor receptor substrate 2 phosphotyrosine-binding domain (4.23e-20)	-	Unique gene in pea aphid genome, fibroblast growth factor receptor substrate gene
cdg	ACYPI25533; XM_008182703	Outside	Chromo barrel domain of human male-specific lethal complex subunit 3 (9.63e-07)	-	Unique gene in pea aphid genome, possible chromodomain-encoding gene
ORFs outside of the genetically defined api region, but shown on Figure 2:
GeneID (Fig. 2a)	ACYPI ID; Genbank ID (if available)	Inside or outside insertion	Top conserved domain (top evalue) by blastx	TE* blastn (top evalue)
g15	ACYPI25536; XM_016802688	Outside of api	-	-	Unique gene in pea aphid genome, unknown function
g16	ACYPI084543; XM_016802684	Outside of api	hAT family C-terminal dimerization region (2.03e-03)	TIRuncomp (1e-148)	Repetitive in pea aphid genome, TE with terminal inverted repeats (TIRs)
g17	ACYPI008587; XM_008182703	Outside of api	Catalytic domain of the Serine/Threonine kinase, Checkpoint kinase 1 (9.39e-102)	-	Unique gene in pea aphid genome, possible serine threonine kinase gene
*Transposable element database of 13,911 pea aphid TE consensus sequences (21); some of the TEs in the database are curated into families, and others are not categorized (here called "Other TE repeat")
