# Supplementary material for: A large genomic insertion containing a duplicated follistatin gene is linked to the pea aphid male wing dimorphism
Source: eLife. 2020 Mar 6;9:e50608. doi: 10.7554/eLife.50608 (PMC7060042; doi:10.7554/eLife.50608)
Supplement: Supplementary file 2. [file elife-50608-supp2.xlsx]

## Sheet: Sheet1
Supplementary file 2: Synonymous and non-synonymous substitution rates based on codon-aligned nucleotide sequences.
sequence 1	sequence 2	Sd	Sn	S	N	ps	pn	ds	dn	dn/ds
fs-3 (pea aphid)	fs-2 (pea aphid)	14	11	217	770	0.0645	0.0143	0.0675	0.0144	0.213333
fs-3 (pea aphid)	fs (soybean aphid)	82.8333	70.1667	216	765	0.3835	0.0917	0.537	0.0978	0.182123
fs-3 (pea aphid)	fs (bird cherry-oat aphid)	72.6667	50.3333	218.667	768.333	0.3323	0.0655	0.439	0.0685	0.156036
fs-3 (pea aphid)	fs (peach-potato aphid)	61	44	220.333	766.667	0.2769	0.0574	0.3455	0.0597	0.172793
fs-3 (pea aphid)	fs-1 (pea aphid)	52.6667	45.3333	220.5	766.5	0.2389	0.0591	0.2876	0.0616	0.214186
fs-3 (pea aphid)	fs (Carolinaia spp)	58	42	221.5	765.5	0.2619	0.0549	0.3221	0.057	0.176964
fs-3 (pea aphid)	fs (rose aphid)	53.5	41.5	221.667	765.333	0.2414	0.0542	0.2912	0.0563	0.193338
fs-2 (pea aphid)	fs (soybean aphid)	84.3333	69.6667	215	766	0.3922	0.0909	0.5552	0.097	0.174712
fs-2 (pea aphid)	fs (bird cherry-oat aphid)	74.1667	48.8333	217.667	769.333	0.3407	0.0635	0.4543	0.0663	0.145939
fs-2 (pea aphid)	fs (peach-potato aphid)	56	42	219.333	767.667	0.2553	0.0547	0.3121	0.0568	0.181993
fs-2 (pea aphid)	fs-1 (pea aphid)	51.6667	43.3333	219.5	767.5	0.2354	0.0565	0.2825	0.0587	0.207788
fs-2 (pea aphid)	fs (Carolinaia spp)	57	40	220.5	766.5	0.2585	0.0522	0.317	0.0541	0.170662
fs-2 (pea aphid)	fs (rose aphid)	52.5	39.5	220.667	766.333	0.2379	0.0515	0.2862	0.0534	0.186583
fs (soybean aphid)	fs (bird cherry-oat aphid)	64.5	36.5	216.333	764.667	0.2982	0.0477	0.38	0.0493	0.129737
fs (soybean aphid)	fs (peach-potato aphid)	92	39	218.167	762.833	0.4217	0.0511	0.6196	0.053	0.0855391
fs (soybean aphid)	fs-1 (pea aphid)	89	39	218.167	762.833	0.4079	0.0511	0.5888	0.053	0.0900136
fs (soybean aphid)	fs (Carolinaia spp)	88	40	219.167	761.833	0.4015	0.0525	0.5749	0.0544	0.0946252
fs (soybean aphid)	fs (rose aphid)	84.5	40.5	219.333	761.667	0.3853	0.0532	0.5407	0.0552	0.10209
fs (bird cherry-oat aphid)	fs (peach-potato aphid)	81	16	221	766	0.3665	0.0209	0.5031	0.0212	0.0421387
fs (bird cherry-oat aphid)	fs-1 (pea aphid)	75	18	221.167	765.833	0.3391	0.0235	0.4513	0.0239	0.0529581
fs (bird cherry-oat aphid)	fs (Carolinaia spp)	75.5	17.5	222.167	764.833	0.3398	0.0229	0.4526	0.0232	0.0512594
fs (bird cherry-oat aphid)	fs (rose aphid)	76	16	222.333	764.667	0.3418	0.0209	0.4563	0.0212	0.0464607
fs (peach-potato aphid)	fs-1 (pea aphid)	53	11	222.833	764.167	0.2378	0.0144	0.2861	0.0145	0.0506816
fs (peach-potato aphid)	10xgenomi	59	10	223.833	763.167	0.2636	0.0131	0.3248	0.0132	0.0406404
fs (peach-potato aphid)	fs (rose aphid)	50	7	224	763	0.2232	0.0092	0.265	0.0092	0.034717
fs-1 (pea aphid)	fs (Carolinaia spp)	51.5	9.5	225	765	0.2289	0.0124	0.2731	0.0125	0.0457708
fs-1 (pea aphid)	fs (rose aphid)	32	7	225.167	764.833	0.1421	0.0092	0.1576	0.0092	0.0583756
fs (Carolinaia spp)	fs (rose aphid)	42	6	226.167	763.833	0.1857	0.0079	0.2134	0.0079	0.0370197
