# Supplementary material for: A large genomic insertion containing a duplicated follistatin gene is linked to the pea aphid male wing dimorphism
Source: eLife. 2020 Mar 6;9:e50608. doi: 10.7554/eLife.50608 (PMC7060042; doi:10.7554/eLife.50608)
Supplement: Supplementary file 3. [file elife-50608-supp3.xlsx]

## Sheet: Sheet1
Supplementary file 3: Collection locations for winged and wingless males used in the pool-seq study.
Location	Number of winged males	Number of wingless males
Rochester, NY	8	8
Martell, NE	9	9
Lincoln, NE	23	23
Berkley, MA	1	1
Davis, CA	3	3
Total	44	44
